# Supplementary material for: Theoretical kinetic studies on intramolecular H-migration reactions of peroxy radicals of diethoxymethane
Source: Royal Society of Chemistry journal article supplement (doi:10.1039/d4cp02302a), 2024-01-01
Supplement: d4cp02302a1.pdf [file d4cp02302a1.pdf]

## Supplemental Materials

### Theoretical Kinetic Studies on Intramolecular H-migration reactions of Peroxy Radicals of Diethoxymethane

#### Contents:

- (1) Rate constants of R3 and R4 with different configurations of transition states.
- (2) MS-T, MS-LH and SS-HO partition functions of R1, R2, P1, P2, P3 and P4.
- (3) The computed thermodynamic properties including enthalpy, heat capacity at constant pressure and entropy of R1, R2, P1, P2, P3 and P4 using MS-T, MS-LH and SS-HO.
- (4) Variational transmission coefficients, imaginary frequencies of transition states along with their corresponding crossover temperatures and SCT tunneling transmission coefficients for every pathway of R1-R4.
- (5) The multi-structure torsional anharmonicity factors and generalized transmission coefficients for R1-R4.
- (6) The high-pressure limit rate constants of every pathway of R1-R4 calculated by using TST.
- (7) The high-pressure limit rate constants of R1-R4 using MS-TST/ZCT.
- (8) The pressure dependent rate constants of R1-R4.
- (9) Cartesian coordinates of the reactant, products and transition states at M06-2X/6-311++g(d,p).
- (10) T1 diagnostic values for reactants, products, and transition states.

**(1) Rate constants of R3 and R4 with different configurations of transition states.**

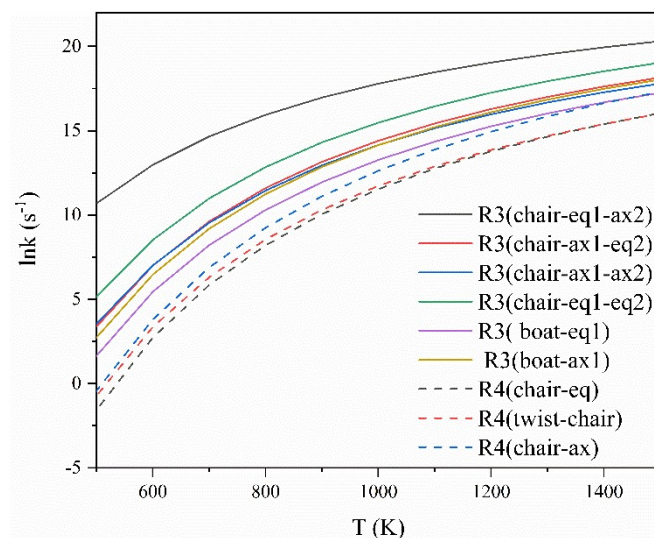

**Figure S1.** MS-TST/ZCT rate constants of R3 and R4 with different configurations of transition states.

**(2) MS-T, MS-LH and SS-HO partition functions of R1, R2, P1, P2, P3 and P4.**

**Table S1.** Conformational-rotational-vibrational partition functions of reactants and products using MS-T and MS-LH, and the harmonic rotational-vibrational partition function (SS-QH) of the lowest energy structure at different temperatures.

| T/K  | Reactant 1 |          |          | P1       |          |          | P2       |          |          |
|------|------------|----------|----------|----------|----------|----------|----------|----------|----------|
|      | MS-T       | MS-LH    | SS-HO    | MS-T     | MS-LH    | SS-HO    | MS-T     | MS-LH    | SS-HO    |
| 300  | 1.63E-64   | 1.00E-64 | 2.63E-66 | 1.94E-64 | 1.10E-64 | 2.34E-65 | 1.49E-65 | 7.33E-65 | 1.09E-65 |
| 400  | 2.75E-44   | 1.67E-44 | 2.96E-46 | 3.04E-44 | 1.44E-44 | 2.09E-45 | 1.98E-45 | 9.37E-45 | 9.30E-46 |
| 500  | 1.22E-31   | 7.45E-32 | 9.66E-34 | 1.48E-31 | 6.25E-32 | 6.16E-33 | 8.96E-33 | 4.11E-32 | 2.69E-33 |
| 600  | 8.33E-23   | 5.15E-23 | 5.18E-25 | 1.16E-22 | 4.57E-23 | 3.16E-24 | 6.95E-24 | 3.11E-23 | 1.36E-24 |
| 700  | 3.59E-16   | 2.25E-16 | 1.84E-18 | 5.80E-16 | 2.19E-16 | 1.10E-17 | 3.54E-17 | 1.56E-16 | 4.75E-18 |
| 800  | 6.27E-11   | 4.02E-11 | 2.75E-13 | 1.16E-10 | 4.29E-11 | 1.64E-12 | 7.36E-12 | 3.20E-11 | 7.06E-13 |
| 900  | 1.25E-06   | 8.19E-07 | 4.84E-09 | 2.63E-06 | 9.61E-07 | 2.90E-08 | 1.73E-07 | 7.44E-07 | 1.24E-08 |
| 1000 | 5.32E-03   | 3.56E-03 | 1.85E-05 | 1.25E-02 | 4.56E-03 | 1.11E-04 | 8.57E-04 | 3.65E-03 | 4.77E-05 |
| 1100 | 7.17E+00   | 4.92E+00 | 2.29E-02 | 1.87E+01 | 6.83E+00 | 1.39E-01 | 1.33E+00 | 5.63E+00 | 5.94E-02 |
| 1200 | 4.01E+03   | 2.82E+03 | 1.19E+01 | 1.14E+04 | 4.21E+03 | 7.26E+01 | 8.42E+02 | 3.55E+03 | 3.11E+01 |
| 1300 | 1.12E+06   | 8.10E+05 | 3.14E+03 | 3.47E+06 | 1.29E+06 | 1.92E+04 | 2.64E+05 | 1.11E+06 | 8.23E+03 |
| 1400 | 1.80E+08   | 1.33E+08 | 4.78E+05 | 5.97E+08 | 2.24E+08 | 2.94E+06 | 4.68E+07 | 1.97E+08 | 1.26E+06 |
| 1500 | 1.82E+10   | 1.38E+10 | 4.63E+07 | 6.44E+10 | 2.45E+10 | 2.86E+08 | 5.19E+09 | 2.19E+10 | 1.23E+08 |

  

| T/K  | Reactant 2 |          |          | P3       |          |          | P4       |          |          |
|------|------------|----------|----------|----------|----------|----------|----------|----------|----------|
|      | MS-T       | MS-LH    | SS-HO    | MS-T     | MS-LH    | SS-HO    | MS-T     | MS-LH    | SS-HO    |
| 300  | 1.23E-64   | 1.63E-64 | 1.73E-65 | 1.15E-63 | 1.33E-63 | 7.70E-65 | 7.88E-61 | 8.44E-61 | 9.95E-63 |
| 400  | 1.91E-44   | 2.70E-44 | 1.87E-45 | 1.33E-43 | 1.72E-43 | 6.13E-45 | 2.70E-41 | 3.29E-41 | 2.33E-43 |
| 500  | 8.10E-32   | 1.19E-31 | 5.98E-33 | 5.08E-31 | 6.95E-31 | 1.71E-32 | 5.04E-29 | 6.64E-29 | 3.35E-31 |
| 600  | 5.37E-23   | 7.99E-23 | 3.18E-24 | 3.27E-22 | 4.58E-22 | 8.51E-24 | 2.05E-20 | 2.80E-20 | 1.11E-22 |
| 700  | 2.27E-16   | 3.35E-16 | 1.12E-17 | 1.39E-15 | 1.94E-15 | 2.92E-17 | 6.36E-14 | 8.70E-14 | 2.89E-16 |
| 800  | 3.91E-11   | 5.64E-11 | 1.68E-12 | 2.45E-10 | 3.35E-10 | 4.31E-12 | 8.92E-09 | 1.19E-08 | 3.48E-11 |
| 900  | 7.74E-07   | 1.08E-06 | 2.95E-08 | 4.97E-06 | 6.57E-06 | 7.52E-08 | 1.53E-04 | 1.97E-04 | 5.20E-07 |
| 1000 | 3.27E-03   | 4.35E-03 | 1.13E-04 | 2.16E-02 | 2.74E-02 | 2.88E-04 | 5.85E-01 | 7.12E-01 | 1.75E-03 |

|      |          |          |          |          |          |          |          |          |          |
|------|----------|----------|----------|----------|----------|----------|----------|----------|----------|
| 1100 | 4.40E+00 | 5.56E+00 | 1.39E-01 | 2.99E+01 | 3.60E+01 | 3.57E-01 | 7.32E+02 | 8.35E+02 | 1.93E+00 |
| 1200 | 2.46E+03 | 2.94E+03 | 7.25E+01 | 1.72E+04 | 1.95E+04 | 1.86E+02 | 3.88E+05 | 4.13E+05 | 9.13E+02 |
| 1300 | 6.91E+05 | 7.74E+05 | 1.91E+04 | 4.94E+06 | 5.29E+06 | 4.92E+04 | 1.04E+08 | 1.03E+08 | 2.20E+05 |
| 1400 | 1.11E+08 | 1.17E+08 | 2.90E+06 | 8.13E+08 | 8.16E+08 | 7.51E+06 | 1.63E+10 | 1.48E+10 | 3.07E+07 |
| 1500 | 1.13E+10 | 1.11E+10 | 2.81E+08 | 8.45E+10 | 7.95E+10 | 7.30E+08 | 1.62E+12 | 1.36E+12 | 2.75E+09 |

**(3) The computed thermodynamic properties including enthalpy, heat capacity at constant pressure and entropy of R1, R2, P1, P2, P3 and P4 using MS-T, MS-LH and SS-HO.**

**Table S2.** Enthalpy (kcal·mol<sup>-1</sup>), heat capacity at constant pressure (cal·mol<sup>-1</sup>·K<sup>-1</sup>) and entropy (cal·mol<sup>-1</sup>·K<sup>-1</sup>) of R1 using MS-T, MS-LH and SS-HO

| T(K) | $H_T^0$ |        |        | $C_p^0(T)$ |       |       | $S_T^0$ |        |        |
|------|---------|--------|--------|------------|-------|-------|---------|--------|--------|
|      | SS-HO   | MS-LH  | MS-T   | SS-HO      | MS-LH | MS-T  | SS-HO   | MS-LH  | MS-T   |
| 300  | 109.31  | 110.69 | 110.72 | 39.22      | 42.55 | 42.34 | 103.30  | 113.20 | 114.28 |
| 400  | 113.53  | 115.43 | 115.43 | 49.09      | 52.16 | 51.78 | 115.94  | 126.77 | 127.77 |
| 500  | 118.70  | 121.09 | 121.04 | 58.06      | 60.75 | 60.22 | 127.88  | 139.36 | 140.25 |
| 600  | 124.70  | 127.53 | 127.43 | 65.67      | 68.00 | 67.32 | 139.16  | 151.09 | 151.88 |
| 700  | 131.40  | 134.64 | 134.47 | 72.03      | 74.07 | 73.25 | 149.77  | 162.04 | 162.72 |
| 800  | 138.68  | 142.31 | 142.05 | 77.38      | 79.18 | 78.24 | 159.75  | 172.28 | 172.83 |
| 900  | 146.46  | 150.46 | 150.09 | 81.91      | 83.53 | 82.48 | 169.13  | 181.86 | 182.30 |
| 1000 | 154.65  | 159.00 | 158.53 | 85.78      | 87.25 | 86.11 | 177.97  | 190.86 | 191.18 |
| 1100 | 163.21  | 167.89 | 167.30 | 89.10      | 90.43 | 89.23 | 186.31  | 199.33 | 199.54 |
| 1200 | 172.07  | 177.07 | 176.36 | 91.95      | 93.18 | 91.92 | 194.18  | 207.32 | 207.42 |
| 1300 | 181.19  | 186.51 | 185.67 | 94.41      | 95.54 | 94.25 | 201.64  | 214.87 | 214.87 |
| 1400 | 190.55  | 196.17 | 195.20 | 96.53      | 97.58 | 96.28 | 208.72  | 222.03 | 221.93 |
| 1500 | 200.10  | 206.02 | 204.92 | 98.37      | 99.36 | 98.05 | 215.44  | 228.82 | 228.64 |

**Table S3.** Enthalpy (kcal·mol<sup>-1</sup>), heat capacity at constant pressure (cal·mol<sup>-1</sup>·K<sup>-1</sup>) and entropy (cal·mol<sup>-1</sup>·K<sup>-1</sup>) of P1 using MS-T, MS-LH and SS-HO

| T(K) | $H_T^0$ |        |        | $C_p^0(T)$ |       |       | $S_T^0$ |        |        |
|------|---------|--------|--------|------------|-------|-------|---------|--------|--------|
|      | SS-HO   | MS-LH  | MS-T   | SS-HO      | MS-LH | MS-T  | SS-HO   | MS-LH  | MS-T   |
| 300  | 108.68  | 109.93 | 110.29 | 40.46      | 46.04 | 48.10 | 105.59  | 110.85 | 113.17 |
| 400  | 113.05  | 115.10 | 115.57 | 50.57      | 56.86 | 57.20 | 118.63  | 125.65 | 128.31 |
| 500  | 118.37  | 121.22 | 121.68 | 59.47      | 65.24 | 64.72 | 130.90  | 139.28 | 141.90 |
| 600  | 124.51  | 128.09 | 128.48 | 66.88      | 71.94 | 71.10 | 142.42  | 151.78 | 154.28 |
| 700  | 131.32  | 135.57 | 135.86 | 73.01      | 77.40 | 76.43 | 153.20  | 163.30 | 165.66 |
| 800  | 138.69  | 143.54 | 143.73 | 78.14      | 81.93 | 80.90 | 163.30  | 173.94 | 176.16 |
| 900  | 146.54  | 151.93 | 152.02 | 82.50      | 85.74 | 84.69 | 172.76  | 183.81 | 185.92 |
| 1000 | 154.78  | 160.67 | 160.65 | 86.22      | 88.99 | 87.93 | 181.65  | 193.02 | 195.01 |
| 1100 | 163.37  | 169.71 | 169.59 | 89.42      | 91.79 | 90.72 | 190.02  | 201.64 | 203.53 |
| 1200 | 172.26  | 179.01 | 178.78 | 92.18      | 94.21 | 93.13 | 197.92  | 209.73 | 211.53 |
| 1300 | 181.41  | 188.54 | 188.20 | 94.56      | 96.32 | 95.22 | 205.39  | 217.36 | 219.06 |
| 1400 | 190.77  | 198.27 | 197.82 | 96.64      | 98.16 | 97.05 | 212.48  | 224.56 | 226.19 |
| 1500 | 200.34  | 208.17 | 207.61 | 98.44      | 99.77 | 98.65 | 219.21  | 231.39 | 232.94 |

**Table S4.** Enthalpy (kcal·mol<sup>-1</sup>), heat capacity at constant pressure (cal· mol<sup>-1</sup>· K<sup>-1</sup>) and entropy (cal· mol<sup>-1</sup>· K<sup>-1</sup>) of P2 using MS-T, MS-LH and SS-HO

| T(K) | $H_T^0$ |        |        | $C_p^0(T)$ |       |       | $S_T^0$ |        |        |
|------|---------|--------|--------|------------|-------|-------|---------|--------|--------|
|      | SS-HO   | MS-LH  | MS-T   | SS-HO      | MS-LH | MS-T  | SS-HO   | MS-LH  | MS-T   |
| 300  | 108.56  | 109.86 | 109.92 | 40.93      | 46.04 | 46.78 | 103.65  | 109.81 | 106.84 |
| 400  | 112.96  | 115.08 | 115.19 | 50.88      | 58.00 | 58.38 | 116.80  | 124.74 | 121.94 |
| 500  | 118.31  | 121.36 | 121.49 | 59.68      | 67.07 | 67.15 | 129.13  | 138.71 | 135.96 |
| 600  | 124.46  | 128.40 | 128.54 | 67.03      | 73.51 | 73.54 | 140.68  | 151.54 | 148.80 |
| 700  | 131.28  | 136.01 | 136.16 | 73.12      | 78.46 | 78.51 | 151.48  | 163.26 | 160.52 |
| 800  | 138.66  | 144.07 | 144.22 | 78.22      | 82.58 | 82.61 | 161.59  | 174.01 | 171.28 |
| 900  | 146.51  | 152.51 | 152.66 | 82.56      | 86.13 | 86.11 | 171.06  | 183.95 | 181.22 |
| 1000 | 154.76  | 161.28 | 161.42 | 86.27      | 89.24 | 89.13 | 179.95  | 193.19 | 190.45 |
| 1100 | 163.35  | 170.34 | 170.47 | 89.45      | 91.97 | 91.74 | 188.33  | 201.83 | 199.07 |
| 1200 | 172.25  | 179.66 | 179.76 | 92.21      | 94.37 | 94.00 | 196.23  | 209.93 | 207.15 |
| 1300 | 181.39  | 189.21 | 189.26 | 94.59      | 96.47 | 95.96 | 203.71  | 217.57 | 214.76 |
| 1400 | 190.76  | 198.95 | 198.94 | 96.65      | 98.31 | 97.65 | 210.80  | 224.79 | 221.93 |
| 1500 | 200.33  | 208.86 | 208.78 | 98.45      | 99.92 | 99.11 | 217.53  | 231.63 | 228.72 |

**Table S5.** Enthalpy (kcal·mol<sup>-1</sup>), heat capacity at constant pressure (cal· mol<sup>-1</sup>· K<sup>-1</sup>) and entropy (cal· mol<sup>-1</sup>· K<sup>-1</sup>) of R2 using MS-T, MS-LH and SS-HO

| T(K) | $H_T^0$ |        |        | $C_p^0(T)$ |       |       | $S_T^0$ |        |        |
|------|---------|--------|--------|------------|-------|-------|---------|--------|--------|
|      | SS-HO   | MS-LH  | MS-T   | SS-HO      | MS-LH | MS-T  | SS-HO   | MS-LH  | MS-T   |
| 300  | 109.19  | 110.67 | 110.51 | 39.62      | 43.03 | 42.87 | 106.70  | 113.02 | 114.10 |
| 400  | 113.45  | 115.41 | 115.25 | 49.37      | 51.74 | 51.90 | 119.44  | 126.60 | 127.68 |
| 500  | 118.64  | 120.99 | 120.87 | 58.28      | 59.51 | 60.23 | 131.44  | 139.09 | 140.09 |
| 600  | 124.66  | 127.27 | 127.26 | 65.84      | 66.02 | 67.37 | 142.75  | 150.72 | 151.53 |
| 700  | 131.37  | 134.15 | 134.31 | 72.17      | 71.43 | 73.40 | 153.39  | 161.57 | 162.13 |
| 800  | 138.66  | 141.53 | 141.91 | 77.49      | 75.98 | 78.50 | 163.39  | 171.72 | 171.97 |
| 900  | 146.44  | 149.33 | 149.98 | 82.01      | 79.86 | 82.84 | 172.78  | 181.22 | 181.15 |
| 1000 | 154.64  | 157.48 | 158.46 | 85.86      | 83.18 | 86.57 | 181.63  | 190.15 | 189.74 |
| 1100 | 163.20  | 165.95 | 167.28 | 89.17      | 86.04 | 89.77 | 189.97  | 198.55 | 197.80 |
| 1200 | 172.06  | 174.68 | 176.40 | 92.01      | 88.50 | 92.53 | 197.85  | 206.48 | 205.40 |
| 1300 | 181.19  | 183.64 | 185.77 | 94.47      | 90.63 | 94.92 | 205.32  | 213.99 | 212.57 |
| 1400 | 190.55  | 192.79 | 195.37 | 96.59      | 92.47 | 96.99 | 212.40  | 221.10 | 219.35 |
| 1500 | 200.10  | 202.12 | 205.16 | 98.43      | 94.07 | 98.78 | 219.12  | 227.85 | 225.79 |

**Table S6.** Enthalpy (kcal·mol<sup>-1</sup>), heat capacity at constant pressure (cal· mol<sup>-1</sup>· K<sup>-1</sup>) and entropy (cal· mol<sup>-1</sup>· K<sup>-1</sup>) of P3 using MS-T, MS-LH and SS-HO

| T(K) | $H_T^0$ |        |        | $C_p^0(T)$ |       |       | $S_T^0$ |        |        |
|------|---------|--------|--------|------------|-------|-------|---------|--------|--------|
|      | SS-HO   | MS-LH  | MS-T   | SS-HO      | MS-LH | MS-T  | SS-HO   | MS-LH  | MS-T   |
| 300  | 108.38  | 109.71 | 109.96 | 41.46      | 45.07 | 45.57 | 106.91  | 114.79 | 115.90 |
| 400  | 112.81  | 114.70 | 114.96 | 51.16      | 54.53 | 54.26 | 120.17  | 129.07 | 130.22 |
| 500  | 118.18  | 120.58 | 120.77 | 59.85      | 62.77 | 61.79 | 132.55  | 142.15 | 143.17 |

|      |        |        |        |       |       |       |        |        |        |
|------|--------|--------|--------|-------|-------|-------|--------|--------|--------|
| 600  | 124.34 | 127.20 | 127.27 | 67.13 | 69.60 | 68.01 | 144.12 | 154.22 | 155.00 |
| 700  | 131.17 | 134.46 | 134.34 | 73.20 | 75.26 | 73.14 | 154.94 | 165.39 | 165.88 |
| 800  | 138.56 | 142.23 | 141.87 | 78.29 | 80.03 | 77.44 | 165.06 | 175.76 | 175.94 |
| 900  | 146.42 | 150.44 | 149.80 | 82.61 | 84.08 | 81.10 | 174.54 | 185.42 | 185.27 |
| 1000 | 154.67 | 159.02 | 158.07 | 86.32 | 87.56 | 84.24 | 183.44 | 194.47 | 193.99 |
| 1100 | 163.27 | 167.94 | 166.64 | 89.50 | 90.57 | 86.94 | 191.82 | 202.96 | 202.14 |
| 1200 | 172.17 | 177.13 | 175.45 | 92.25 | 93.18 | 89.27 | 199.73 | 210.95 | 209.81 |
| 1300 | 181.32 | 186.56 | 184.48 | 94.62 | 95.44 | 91.29 | 207.20 | 218.50 | 217.04 |
| 1400 | 190.69 | 196.20 | 193.70 | 96.69 | 97.41 | 93.03 | 214.29 | 225.65 | 223.87 |
| 1500 | 200.26 | 206.03 | 203.08 | 98.49 | 99.12 | 94.55 | 221.03 | 232.43 | 230.34 |

**Table S7.** Enthalpy (kcal·mol<sup>-1</sup>), heat capacity at constant pressure (cal· mol<sup>-1</sup>· K<sup>-1</sup>) and entropy (cal· mol<sup>-1</sup>· K<sup>-1</sup>) of P4 using MS-T, MS-LH and SS-HO

| T(K) | $H_T^0$ |        |        | $C_p^0(T)$ |       |       | $S_T^0$ |        |        |
|------|---------|--------|--------|------------|-------|-------|---------|--------|--------|
|      | SS-HO   | MS-LH  | MS-T   | SS-HO      | MS-LH | MS-T  | SS-HO   | MS-LH  | MS-T   |
| 300  | 107.98  | 106.76 | 107.04 | 41.75      | 45.76 | 46.68 | 104.32  | 116.57 | 117.63 |
| 400  | 112.46  | 111.83 | 112.16 | 51.63      | 55.38 | 55.37 | 117.70  | 131.07 | 132.28 |
| 500  | 117.88  | 117.80 | 118.07 | 60.34      | 63.74 | 62.70 | 130.18  | 144.35 | 145.45 |
| 600  | 124.09  | 124.53 | 124.65 | 67.58      | 70.63 | 68.68 | 141.85  | 156.60 | 157.43 |
| 700  | 130.96  | 131.88 | 131.77 | 73.57      | 76.32 | 73.61 | 152.73  | 167.93 | 168.39 |
| 800  | 138.38  | 139.76 | 139.34 | 78.60      | 81.08 | 77.75 | 162.89  | 178.44 | 178.50 |
| 900  | 146.26  | 148.07 | 147.30 | 82.87      | 85.11 | 81.28 | 172.40  | 188.23 | 187.87 |
| 1000 | 154.54  | 156.76 | 155.58 | 86.52      | 88.56 | 84.31 | 181.32  | 197.38 | 196.59 |
| 1100 | 163.16  | 165.77 | 164.15 | 89.67      | 91.53 | 86.92 | 189.72  | 205.97 | 204.75 |
| 1200 | 172.07  | 175.05 | 172.95 | 92.38      | 94.09 | 89.17 | 197.64  | 214.04 | 212.41 |
| 1300 | 181.23  | 184.58 | 181.97 | 94.74      | 96.30 | 91.12 | 205.13  | 221.66 | 219.63 |
| 1400 | 190.62  | 194.30 | 191.17 | 96.78      | 98.21 | 92.81 | 212.23  | 228.87 | 226.45 |
| 1500 | 200.19  | 204.21 | 200.53 | 98.56      | 99.88 | 94.28 | 218.97  | 235.70 | 232.90 |

**(4) Variational transmission coefficients, imaginary frequencies of transition states along with their corresponding crossover temperatures and SCT tunneling transmission coefficients for every pathway of R1-R4.**

**Table S8.** The variational transmission coefficients of every pathway of R1.

| T(K) | 1    | 2    | 3    | 4    | 5    | 6    | 7    | 8    | 9    | 10   | 11   | 12   | 13   | 14   | 15   |
|------|------|------|------|------|------|------|------|------|------|------|------|------|------|------|------|
| 300  | 0.94 | 0.91 | 0.99 | 0.93 | 0.97 | 0.95 | 0.94 | 0.98 | 0.82 | 0.86 | 0.94 | 0.79 | 0.89 | 0.70 | 0.74 |
| 400  | 0.93 | 0.90 | 0.99 | 0.91 | 0.96 | 0.94 | 0.93 | 0.97 | 0.80 | 0.84 | 0.93 | 0.76 | 0.87 | 0.67 | 0.71 |
| 500  | 0.92 | 0.89 | 0.99 | 0.90 | 0.96 | 0.92 | 0.92 | 0.97 | 0.78 | 0.82 | 0.92 | 0.74 | 0.86 | 0.66 | 0.70 |
| 600  | 0.91 | 0.88 | 0.99 | 0.89 | 0.95 | 0.91 | 0.91 | 0.97 | 0.76 | 0.81 | 0.91 | 0.72 | 0.84 | 0.63 | 0.68 |
| 700  | 0.90 | 0.87 | 0.99 | 0.88 | 0.94 | 0.90 | 0.90 | 0.97 | 0.76 | 0.80 | 0.91 | 0.71 | 0.83 | 0.62 | 0.67 |
| 800  | 0.89 | 0.86 | 0.99 | 0.87 | 0.94 | 0.89 | 0.90 | 0.97 | 0.75 | 0.79 | 0.90 | 0.69 | 0.82 | 0.60 | 0.65 |
| 900  | 0.88 | 0.86 | 0.99 | 0.86 | 0.94 | 0.89 | 0.89 | 0.97 | 0.74 | 0.78 | 0.89 | 0.68 | 0.81 | 0.59 | 0.64 |
| 1000 | 0.88 | 0.85 | 0.99 | 0.85 | 0.93 | 0.88 | 0.88 | 0.96 | 0.73 | 0.78 | 0.89 | 0.67 | 0.81 | 0.58 | 0.63 |
| 1100 | 0.87 | 0.84 | 0.99 | 0.85 | 0.93 | 0.87 | 0.87 | 0.96 | 0.72 | 0.77 | 0.89 | 0.66 | 0.80 | 0.57 | 0.62 |
| 1200 | 0.87 | 0.84 | 0.99 | 0.84 | 0.92 | 0.87 | 0.87 | 0.96 | 0.71 | 0.76 | 0.88 | 0.65 | 0.79 | 0.57 | 0.62 |

|      |      |      |      |      |      |      |      |      |      |      |      |      |      |      |      |
|------|------|------|------|------|------|------|------|------|------|------|------|------|------|------|------|
| 1300 | 0.86 | 0.84 | 0.99 | 0.83 | 0.92 | 0.86 | 0.86 | 0.96 | 0.70 | 0.75 | 0.88 | 0.64 | 0.79 | 0.56 | 0.61 |
| 1400 | 0.86 | 0.84 | 0.99 | 0.83 | 0.91 | 0.85 | 0.86 | 0.96 | 0.70 | 0.75 | 0.88 | 0.64 | 0.78 | 0.55 | 0.60 |
| 1500 | 0.86 | 0.83 | 0.99 | 0.82 | 0.91 | 0.85 | 0.85 | 0.96 | 0.69 | 0.74 | 0.88 | 0.63 | 0.78 | 0.55 | 0.60 |
| T(K) | 16   | 17   | 18   | 19   | 20   | 21   | 22   | 23   | 24   | 25   | 26   | 27   | 28   | 29   | 30   |
| 300  | 0.92 | 0.98 | 0.99 | 0.98 | 0.97 | 0.99 | 0.96 | 0.98 | 0.95 | 0.93 | 0.83 | 0.94 | 0.95 | 0.95 | 0.92 |
| 400  | 0.90 | 0.98 | 0.99 | 0.98 | 0.97 | 0.99 | 0.96 | 0.98 | 0.94 | 0.92 | 0.82 | 0.93 | 0.95 | 0.94 | 0.92 |
| 500  | 0.89 | 0.98 | 0.99 | 0.98 | 0.96 | 0.99 | 0.95 | 0.98 | 0.94 | 0.90 | 0.81 | 0.92 | 0.94 | 0.94 | 0.91 |
| 600  | 0.88 | 0.98 | 0.99 | 0.98 | 0.96 | 1.00 | 0.94 | 0.98 | 0.93 | 0.90 | 0.81 | 0.91 | 0.93 | 0.93 | 0.91 |
| 700  | 0.87 | 0.97 | 0.99 | 0.98 | 0.95 | 0.99 | 0.94 | 0.98 | 0.92 | 0.89 | 0.80 | 0.90 | 0.93 | 0.93 | 0.90 |
| 800  | 0.86 | 0.97 | 0.99 | 0.97 | 0.95 | 0.99 | 0.94 | 0.98 | 0.92 | 0.88 | 0.80 | 0.90 | 0.92 | 0.93 | 0.90 |
| 900  | 0.85 | 0.97 | 0.99 | 0.97 | 0.95 | 1.00 | 0.93 | 0.98 | 0.91 | 0.87 | 0.80 | 0.89 | 0.91 | 0.92 | 0.90 |
| 1000 | 0.85 | 0.96 | 0.99 | 0.97 | 0.94 | 0.99 | 0.93 | 0.98 | 0.91 | 0.86 | 0.79 | 0.89 | 0.91 | 0.91 | 0.89 |
| 1100 | 0.84 | 0.96 | 0.99 | 0.97 | 0.94 | 0.99 | 0.93 | 0.98 | 0.90 | 0.86 | 0.79 | 0.88 | 0.90 | 0.91 | 0.89 |
| 1200 | 0.83 | 0.96 | 0.99 | 0.97 | 0.94 | 0.99 | 0.92 | 0.98 | 0.89 | 0.86 | 0.79 | 0.88 | 0.90 | 0.91 | 0.89 |
| 1300 | 0.83 | 0.96 | 0.99 | 0.97 | 0.94 | 0.99 | 0.92 | 0.98 | 0.89 | 0.85 | 0.79 | 0.87 | 0.89 | 0.90 | 0.89 |
| 1400 | 0.83 | 0.95 | 0.99 | 0.96 | 0.93 | 0.99 | 0.92 | 0.98 | 0.88 | 0.85 | 0.79 | 0.87 | 0.89 | 0.91 | 0.89 |
| 1500 | 0.82 | 0.95 | 0.99 | 0.96 | 0.93 | 1.00 | 0.91 | 0.97 | 0.88 | 0.84 | 0.79 | 0.86 | 0.88 | 0.90 | 0.89 |

**Table S9.** The variational transmission coefficients of every pathway of R2.

| T(K) | 1    | 2    | 3    | 4    |
|------|------|------|------|------|
| 300  | 0.89 | 0.75 | 0.91 | 0.69 |
| 400  | 0.88 | 0.73 | 0.90 | 0.68 |
| 500  | 0.87 | 0.71 | 0.89 | 0.64 |
| 600  | 0.85 | 0.70 | 0.89 | 0.63 |
| 700  | 0.85 | 0.69 | 0.88 | 0.61 |
| 800  | 0.84 | 0.68 | 0.88 | 0.60 |
| 900  | 0.83 | 0.67 | 0.87 | 0.59 |
| 1000 | 0.82 | 0.66 | 0.86 | 0.58 |
| 1100 | 0.81 | 0.65 | 0.86 | 0.57 |
| 1200 | 0.81 | 0.65 | 0.85 | 0.57 |
| 1300 | 0.80 | 0.64 | 0.85 | 0.56 |
| 1400 | 0.80 | 0.63 | 0.84 | 0.55 |
| 1500 | 0.79 | 0.63 | 0.84 | 0.55 |

**Table S10.** The variational transmission coefficients of every pathway of R3.

| T(K) | 1    | 2    | 3    | 4    | 5    | 6    | 7    | 8    | 9    | 10   | 11   | 12   | 13   | 14   | 15   |
|------|------|------|------|------|------|------|------|------|------|------|------|------|------|------|------|
| 300  | 0.84 | 0.98 | 0.98 | 0.98 | 0.98 | 0.98 | 0.99 | 0.98 | 0.99 | 0.98 | 0.99 | 0.98 | 0.99 | 0.98 | 0.98 |
| 400  | 0.83 | 0.97 | 0.97 | 0.98 | 0.98 | 0.98 | 0.99 | 0.97 | 0.98 | 0.98 | 0.98 | 0.98 | 0.99 | 0.98 | 0.98 |
| 500  | 0.83 | 0.97 | 0.97 | 0.97 | 0.98 | 0.98 | 0.99 | 0.97 | 0.98 | 0.98 | 0.98 | 0.98 | 0.99 | 0.98 | 0.98 |
| 600  | 0.82 | 0.97 | 0.97 | 0.97 | 0.97 | 0.97 | 0.99 | 0.97 | 0.98 | 0.98 | 0.98 | 0.98 | 0.98 | 0.98 | 0.98 |
| 700  | 0.82 | 0.97 | 0.97 | 0.97 | 0.97 | 0.97 | 0.98 | 0.97 | 0.98 | 0.98 | 0.98 | 0.98 | 0.98 | 0.98 | 0.97 |
| 800  | 0.81 | 0.96 | 0.96 | 0.96 | 0.97 | 0.97 | 0.98 | 0.96 | 0.98 | 0.98 | 0.98 | 0.98 | 0.98 | 0.98 | 0.97 |
| 900  | 0.81 | 0.96 | 0.96 | 0.96 | 0.97 | 0.97 | 0.98 | 0.96 | 0.98 | 0.97 | 0.98 | 0.97 | 0.98 | 0.97 | 0.97 |
| 1000 | 0.80 | 0.96 | 0.96 | 0.96 | 0.97 | 0.96 | 0.98 | 0.96 | 0.97 | 0.97 | 0.98 | 0.97 | 0.98 | 0.97 | 0.97 |
| 1100 | 0.80 | 0.96 | 0.96 | 0.95 | 0.96 | 0.96 | 0.98 | 0.96 | 0.97 | 0.97 | 0.98 | 0.97 | 0.98 | 0.97 | 0.97 |
| 1200 | 0.80 | 0.95 | 0.95 | 0.95 | 0.96 | 0.96 | 0.98 | 0.95 | 0.97 | 0.97 | 0.97 | 0.97 | 0.98 | 0.97 | 0.97 |

|      |      |      |      |      |      |      |      |      |      |      |      |      |      |      |      |
|------|------|------|------|------|------|------|------|------|------|------|------|------|------|------|------|
| 1300 | 0.80 | 0.95 | 0.95 | 0.95 | 0.96 | 0.96 | 0.98 | 0.95 | 0.97 | 0.97 | 0.97 | 0.97 | 0.97 | 0.97 | 0.96 |
| 1400 | 0.79 | 0.95 | 0.95 | 0.94 | 0.96 | 0.96 | 0.98 | 0.95 | 0.97 | 0.97 | 0.97 | 0.97 | 0.97 | 0.97 | 0.96 |
| 1500 | 0.79 | 0.95 | 0.95 | 0.94 | 0.96 | 0.96 | 0.98 | 0.95 | 0.97 | 0.97 | 0.97 | 0.97 | 0.97 | 0.97 | 0.96 |
| T(K) | 16   | 17   | 18   | 19   | 20   | 21   | 22   | 23   | 24   | 25   | 26   | 27   | 28   | 29   | 30   |
| 300  | 0.97 | 0.98 | 0.98 | 0.99 | 0.98 | 0.98 | 0.98 | 0.98 | 0.98 | 0.98 | 0.99 | 0.98 | 0.98 | 0.98 | 0.94 |
| 400  | 0.96 | 0.98 | 0.98 | 0.98 | 0.98 | 0.98 | 0.97 | 0.98 | 0.98 | 0.97 | 0.99 | 0.98 | 0.98 | 0.98 | 0.93 |
| 500  | 0.96 | 0.98 | 0.97 | 0.98 | 0.98 | 0.98 | 0.97 | 0.97 | 0.98 | 0.97 | 0.98 | 0.98 | 0.97 | 0.98 | 0.92 |
| 600  | 0.95 | 0.98 | 0.97 | 0.98 | 0.98 | 0.98 | 0.97 | 0.97 | 0.97 | 0.97 | 0.98 | 0.97 | 0.97 | 0.97 | 0.92 |
| 700  | 0.95 | 0.98 | 0.97 | 0.98 | 0.98 | 0.97 | 0.97 | 0.97 | 0.97 | 0.96 | 0.98 | 0.97 | 0.97 | 0.97 | 0.91 |
| 800  | 0.94 | 0.98 | 0.96 | 0.98 | 0.98 | 0.97 | 0.96 | 0.96 | 0.97 | 0.96 | 0.98 | 0.97 | 0.96 | 0.97 | 0.90 |
| 900  | 0.94 | 0.97 | 0.96 | 0.98 | 0.97 | 0.97 | 0.96 | 0.96 | 0.97 | 0.96 | 0.98 | 0.97 | 0.96 | 0.97 | 0.90 |
| 1000 | 0.94 | 0.97 | 0.96 | 0.98 | 0.97 | 0.97 | 0.96 | 0.96 | 0.96 | 0.96 | 0.97 | 0.97 | 0.96 | 0.97 | 0.89 |
| 1100 | 0.93 | 0.97 | 0.96 | 0.97 | 0.97 | 0.96 | 0.96 | 0.96 | 0.96 | 0.95 | 0.97 | 0.96 | 0.96 | 0.96 | 0.89 |
| 1200 | 0.93 | 0.97 | 0.96 | 0.97 | 0.97 | 0.96 | 0.95 | 0.95 | 0.96 | 0.95 | 0.97 | 0.96 | 0.95 | 0.96 | 0.88 |
| 1300 | 0.93 | 0.97 | 0.95 | 0.97 | 0.97 | 0.96 | 0.95 | 0.95 | 0.96 | 0.95 | 0.97 | 0.96 | 0.95 | 0.96 | 0.88 |
| 1400 | 0.93 | 0.96 | 0.95 | 0.97 | 0.97 | 0.96 | 0.95 | 0.95 | 0.96 | 0.95 | 0.97 | 0.96 | 0.95 | 0.96 | 0.87 |
| 1500 | 0.92 | 0.96 | 0.95 | 0.97 | 0.97 | 0.96 | 0.95 | 0.95 | 0.96 | 0.94 | 0.97 | 0.96 | 0.95 | 0.96 | 0.87 |
| T(K) | 31   | 32   | 33   | 34   | 35   | 36   | 37   | 38   | 39   | 40   | 41   | 42   | 43   |      |      |
| 300  | 0.91 | 0.93 | 0.90 | 0.90 | 0.89 | 0.87 | 0.92 | 0.94 | 0.92 | 0.94 | 0.82 | 0.84 | 0.89 |      |      |
| 400  | 0.90 | 0.91 | 0.88 | 0.89 | 0.88 | 0.86 | 0.91 | 0.94 | 0.91 | 0.93 | 0.81 | 0.83 | 0.88 |      |      |
| 500  | 0.89 | 0.90 | 0.87 | 0.88 | 0.86 | 0.84 | 0.90 | 0.93 | 0.90 | 0.92 | 0.80 | 0.82 | 0.86 |      |      |
| 600  | 0.88 | 0.89 | 0.86 | 0.87 | 0.85 | 0.83 | 0.89 | 0.92 | 0.89 | 0.91 | 0.79 | 0.81 | 0.85 |      |      |
| 700  | 0.87 | 0.88 | 0.85 | 0.86 | 0.84 | 0.82 | 0.88 | 0.92 | 0.89 | 0.91 | 0.79 | 0.80 | 0.84 |      |      |
| 800  | 0.86 | 0.87 | 0.84 | 0.85 | 0.83 | 0.81 | 0.87 | 0.91 | 0.88 | 0.90 | 0.76 | 0.79 | 0.83 |      |      |
| 900  | 0.85 | 0.87 | 0.83 | 0.85 | 0.82 | 0.81 | 0.87 | 0.91 | 0.87 | 0.89 | 0.75 | 0.77 | 0.82 |      |      |
| 1000 | 0.84 | 0.86 | 0.82 | 0.84 | 0.81 | 0.80 | 0.86 | 0.90 | 0.87 | 0.89 | 0.74 | 0.77 | 0.81 |      |      |
| 1100 | 0.84 | 0.85 | 0.81 | 0.83 | 0.80 | 0.79 | 0.85 | 0.90 | 0.86 | 0.88 | 0.74 | 0.76 | 0.80 |      |      |
| 1200 | 0.83 | 0.84 | 0.81 | 0.82 | 0.80 | 0.78 | 0.84 | 0.90 | 0.86 | 0.88 | 0.73 | 0.75 | 0.80 |      |      |
| 1300 | 0.83 | 0.84 | 0.80 | 0.82 | 0.79 | 0.78 | 0.84 | 0.89 | 0.85 | 0.87 | 0.73 | 0.75 | 0.79 |      |      |
| 1400 | 0.82 | 0.83 | 0.80 | 0.81 | 0.78 | 0.77 | 0.83 | 0.89 | 0.85 | 0.87 | 0.72 | 0.74 | 0.78 |      |      |
| 1500 | 0.82 | 0.83 | 0.79 | 0.81 | 0.78 | 0.77 | 0.83 | 0.89 | 0.84 | 0.86 | 0.72 | 0.74 | 0.78 |      |      |

**Table S11.** The variational transmission coefficients of every pathway of R4.

| T(K) | 1    | 2    | 3    | 4    | 5    | 6    | 7    | 8    |
|------|------|------|------|------|------|------|------|------|
| 300  | 0.96 | 0.96 | 0.95 | 0.96 | 0.96 | 0.94 | 0.96 | 0.96 |
| 400  | 0.95 | 0.95 | 0.95 | 0.95 | 0.95 | 0.94 | 0.95 | 0.95 |
| 500  | 0.95 | 0.95 | 0.95 | 0.95 | 0.95 | 0.93 | 0.94 | 0.95 |
| 600  | 0.94 | 0.95 | 0.94 | 0.94 | 0.94 | 0.93 | 0.94 | 0.94 |
| 700  | 0.94 | 0.94 | 0.94 | 0.94 | 0.94 | 0.92 | 0.93 | 0.94 |
| 800  | 0.94 | 0.94 | 0.93 | 0.93 | 0.94 | 0.92 | 0.93 | 0.93 |
| 900  | 0.93 | 0.94 | 0.93 | 0.93 | 0.93 | 0.91 | 0.92 | 0.93 |
| 1000 | 0.93 | 0.94 | 0.93 | 0.93 | 0.93 | 0.91 | 0.92 | 0.92 |
| 1100 | 0.93 | 0.93 | 0.93 | 0.92 | 0.93 | 0.90 | 0.92 | 0.92 |
| 1200 | 0.92 | 0.93 | 0.92 | 0.92 | 0.92 | 0.90 | 0.91 | 0.92 |
| 1300 | 0.92 | 0.93 | 0.92 | 0.92 | 0.92 | 0.90 | 0.91 | 0.92 |

|      |      |      |      |      |      |      |      |      |
|------|------|------|------|------|------|------|------|------|
| 1400 | 0.92 | 0.93 | 0.92 | 0.92 | 0.92 | 0.89 | 0.91 | 0.91 |
| 1500 | 0.92 | 0.93 | 0.92 | 0.91 | 0.92 | 0.89 | 0.90 | 0.91 |
| T(K) | 9    | 10   | 11   | 12   | 13   | 14   | 15   | 16   |
| 300  | 0.96 | 0.95 | 0.95 | 0.97 | 0.97 | 0.96 | 0.95 | 0.96 |
| 400  | 0.95 | 0.95 | 0.94 | 0.96 | 0.97 | 0.95 | 0.95 | 0.95 |
| 500  | 0.94 | 0.94 | 0.93 | 0.96 | 0.96 | 0.95 | 0.94 | 0.94 |
| 600  | 0.94 | 0.94 | 0.93 | 0.95 | 0.96 | 0.94 | 0.94 | 0.94 |
| 700  | 0.93 | 0.94 | 0.92 | 0.95 | 0.96 | 0.94 | 0.93 | 0.93 |
| 800  | 0.93 | 0.93 | 0.92 | 0.94 | 0.95 | 0.94 | 0.93 | 0.93 |
| 900  | 0.93 | 0.93 | 0.92 | 0.94 | 0.95 | 0.93 | 0.92 | 0.92 |
| 1000 | 0.92 | 0.92 | 0.91 | 0.94 | 0.95 | 0.93 | 0.92 | 0.92 |
| 1100 | 0.92 | 0.92 | 0.91 | 0.93 | 0.94 | 0.93 | 0.92 | 0.92 |
| 1200 | 0.92 | 0.92 | 0.90 | 0.93 | 0.94 | 0.93 | 0.91 | 0.91 |
| 1300 | 0.91 | 0.92 | 0.90 | 0.93 | 0.94 | 0.92 | 0.91 | 0.91 |
| 1400 | 0.91 | 0.91 | 0.90 | 0.92 | 0.93 | 0.92 | 0.91 | 0.91 |
| 1500 | 0.91 | 0.91 | 0.90 | 0.92 | 0.93 | 0.92 | 0.90 | 0.90 |
| T(K) | 17   | 18   | 19   | 20   | 21   | 22   | 23   |      |
| 300  | 0.95 | 0.94 | 0.95 | 0.95 | 0.95 | 0.96 | 0.96 |      |
| 400  | 0.94 | 0.93 | 0.94 | 0.95 | 0.94 | 0.95 | 0.95 |      |
| 500  | 0.93 | 0.92 | 0.94 | 0.94 | 0.94 | 0.94 | 0.94 |      |
| 600  | 0.93 | 0.91 | 0.93 | 0.94 | 0.93 | 0.94 | 0.94 |      |
| 700  | 0.92 | 0.91 | 0.92 | 0.93 | 0.93 | 0.94 | 0.94 |      |
| 800  | 0.92 | 0.90 | 0.92 | 0.93 | 0.92 | 0.93 | 0.93 |      |
| 900  | 0.91 | 0.89 | 0.91 | 0.92 | 0.92 | 0.93 | 0.93 |      |
| 1000 | 0.91 | 0.89 | 0.91 | 0.92 | 0.92 | 0.92 | 0.92 |      |
| 1100 | 0.90 | 0.88 | 0.90 | 0.92 | 0.91 | 0.92 | 0.92 |      |
| 1200 | 0.90 | 0.88 | 0.90 | 0.91 | 0.91 | 0.92 | 0.92 |      |
| 1300 | 0.89 | 0.87 | 0.89 | 0.91 | 0.91 | 0.91 | 0.91 |      |
| 1400 | 0.89 | 0.87 | 0.89 | 0.91 | 0.91 | 0.91 | 0.91 |      |
| 1500 | 0.89 | 0.86 | 0.89 | 0.90 | 0.90 | 0.91 | 0.91 |      |

**Table S12.** The magnitudes of imaginary frequencies (fre) of transition states along with their corresponding crossover temperatures ( $T_c$ ) and SCT tunneling transmission coefficients for every pathway of R1.

|                        | 1       | 2       | 3       | 4       | 5       | 6       | 7       | 8       | 9      | 10      |
|------------------------|---------|---------|---------|---------|---------|---------|---------|---------|--------|---------|
| fre(cm <sup>-1</sup> ) | 1734.43 | 1709.28 | 1895.42 | 1714.99 | 1679.29 | 1699.37 | 1686.51 | 1861.34 | 1710.2 | 1709.76 |
| $T_c$ (K)              | 397.66  | 391.89  | 434.57  | 393.20  | 385.01  | 389.62  | 386.67  | 426.75  | 392.10 | 392.00  |
| 300                    | 54.42   | 30.87   | 114.43  | 68.47   | 31.35   | 51.71   | 27.15   | 111.60  | 377.57 | 41.54   |
| 400                    | 8.38    | 6.75    | 11.25   | 7.96    | 6.69    | 7.43    | 6.32    | 11.24   | 8.60   | 6.86    |
| 500                    | 3.80    | 3.37    | 4.52    | 3.62    | 3.33    | 3.51    | 3.25    | 4.53    | 3.56   | 3.41    |
| 600                    | 2.50    | 2.32    | 2.81    | 2.41    | 2.29    | 2.37    | 2.26    | 2.81    | 2.36   | 2.34    |
| 700                    | 1.95    | 1.85    | 2.12    | 1.89    | 1.83    | 1.88    | 1.82    | 2.11    | 1.86   | 1.87    |
| 800                    | 1.66    | 1.60    | 1.77    | 1.62    | 1.59    | 1.62    | 1.58    | 1.77    | 1.60   | 1.61    |
| 900                    | 1.49    | 1.45    | 1.57    | 1.46    | 1.44    | 1.46    | 1.43    | 1.56    | 1.45   | 1.46    |



|                        |         |         |         |         |         |         |         |         |         |         |
|------------------------|---------|---------|---------|---------|---------|---------|---------|---------|---------|---------|
| 1000                   | 1.38    | 1.35    | 1.44    | 1.36    | 1.34    | 1.36    | 1.34    | 1.43    | 1.35    | 1.36    |
| 1100                   | 1.30    | 1.28    | 1.35    | 1.29    | 1.27    | 1.29    | 1.27    | 1.34    | 1.28    | 1.29    |
| 1200                   | 1.25    | 1.23    | 1.28    | 1.24    | 1.23    | 1.24    | 1.22    | 1.28    | 1.23    | 1.24    |
| 1300                   | 1.21    | 1.19    | 1.24    | 1.20    | 1.19    | 1.20    | 1.19    | 1.23    | 1.19    | 1.20    |
| 1400                   | 1.18    | 1.16    | 1.20    | 1.17    | 1.16    | 1.17    | 1.16    | 1.20    | 1.16    | 1.17    |
| 1500                   | 1.15    | 1.14    | 1.17    | 1.15    | 1.14    | 1.14    | 1.14    | 1.17    | 1.14    | 1.15    |
|                        | 11      | 12      | 13      | 14      | 15      | 16      | 17      | 18      | 19      | 20      |
| fre(cm <sup>-1</sup> ) | 1939.57 | 1678.35 | 1690.92 | 1666.34 | 1687.98 | 1883.02 | 1805.86 | 1855.28 | 1814    | 1792.29 |
| T <sub>c</sub> (K)     | 444.69  | 384.80  | 387.68  | 382.05  | 387.01  | 431.72  | 414.03  | 425.36  | 415.90  | 410.92  |
| 300                    | 930.60  | 706.49  | 80.59   | 466.18  | 96.33   | 677.94  | 68.24   | 100.29  | 77.57   | 76.32   |
| 400                    | 15.02   | 7.89    | 7.29    | 7.29    | 6.88    | 12.29   | 10.37   | 10.26   | 10.39   | 10.75   |
| 500                    | 5.03    | 3.28    | 3.35    | 3.16    | 3.24    | 4.46    | 4.36    | 4.27    | 4.32    | 4.43    |
| 600                    | 2.96    | 2.23    | 2.27    | 2.18    | 2.23    | 2.72    | 2.74    | 2.71    | 2.72    | 2.76    |
| 700                    | 2.18    | 1.79    | 1.81    | 1.76    | 1.79    | 2.05    | 2.08    | 2.07    | 2.07    | 2.09    |
| 800                    | 1.80    | 1.55    | 1.57    | 1.54    | 1.56    | 1.72    | 1.74    | 1.75    | 1.73    | 1.75    |
| 900                    | 1.58    | 1.41    | 1.43    | 1.40    | 1.42    | 1.53    | 1.55    | 1.55    | 1.54    | 1.55    |
| 1000                   | 1.45    | 1.32    | 1.33    | 1.31    | 1.32    | 1.41    | 1.42    | 1.43    | 1.42    | 1.42    |
| 1100                   | 1.36    | 1.26    | 1.27    | 1.25    | 1.26    | 1.32    | 1.34    | 1.34    | 1.33    | 1.34    |
| 1200                   | 1.29    | 1.21    | 1.22    | 1.21    | 1.21    | 1.26    | 1.27    | 1.28    | 1.27    | 1.28    |
| 1300                   | 1.24    | 1.18    | 1.18    | 1.17    | 1.18    | 1.22    | 1.23    | 1.23    | 1.23    | 1.23    |
| 1400                   | 1.20    | 1.15    | 1.16    | 1.15    | 1.15    | 1.19    | 1.19    | 1.20    | 1.19    | 1.20    |
| 1500                   | 1.18    | 1.13    | 1.13    | 1.13    | 1.13    | 1.16    | 1.17    | 1.17    | 1.17    | 1.17    |
|                        | 21      | 22      | 23      | 24      | 25      | 26      | 27      | 28      | 29      | 30      |
| fre(cm <sup>-1</sup> ) | 1877.16 | 1750.07 | 1867.57 | 1732.73 | 1800.06 | 1909.84 | 1795.69 | 1682.05 | 1831.31 | 1929.92 |
| T <sub>c</sub> (K)     | 430.38  | 401.24  | 428.18  | 397.27  | 412.70  | 437.87  | 411.70  | 385.65  | 419.87  | 442.48  |
| 300                    | 109.46  | 52.50   | 78.88   | 46.82   | 70.48   | 304.14  | 94.95   | 32.02   | 133.65  | 495.63  |
| 400                    | 10.78   | 9.05    | 9.72    | 8.13    | 9.22    | 11.64   | 10.20   | 6.62    | 11.08   | 13.44   |
| 500                    | 4.39    | 4.09    | 4.17    | 3.76    | 3.98    | 4.43    | 4.18    | 3.34    | 4.38    | 4.87    |
| 600                    | 2.75    | 2.65    | 2.67    | 2.49    | 2.56    | 2.75    | 2.63    | 2.31    | 2.72    | 2.94    |
| 700                    | 2.09    | 2.04    | 2.05    | 1.94    | 1.98    | 2.08    | 2.01    | 1.85    | 2.06    | 2.18    |
| 800                    | 1.75    | 1.72    | 1.73    | 1.66    | 1.68    | 1.74    | 1.70    | 1.60    | 1.73    | 1.81    |
| 900                    | 1.55    | 1.54    | 1.54    | 1.49    | 1.50    | 1.54    | 1.51    | 1.45    | 1.53    | 1.59    |
| 1000                   | 1.43    | 1.41    | 1.42    | 1.38    | 1.39    | 1.42    | 1.39    | 1.35    | 1.41    | 1.45    |
| 1100                   | 1.34    | 1.33    | 1.33    | 1.30    | 1.31    | 1.33    | 1.31    | 1.28    | 1.33    | 1.36    |
| 1200                   | 1.28    | 1.27    | 1.27    | 1.25    | 1.25    | 1.27    | 1.26    | 1.23    | 1.27    | 1.29    |
| 1300                   | 1.23    | 1.23    | 1.23    | 1.21    | 1.21    | 1.23    | 1.21    | 1.19    | 1.22    | 1.25    |
| 1400                   | 1.20    | 1.19    | 1.19    | 1.18    | 1.18    | 1.19    | 1.18    | 1.17    | 1.19    | 1.21    |
| 1500                   | 1.17    | 1.17    | 1.17    | 1.15    | 1.15    | 1.17    | 1.16    | 1.14    | 1.16    | 1.18    |

**Table S13.** The magnitudes of imaginary frequencies (fre) of transition states along with their corresponding crossover temperatures (T<sub>c</sub>) and SCT tunneling transmission coefficients for every pathway of R2.

|                        | 1       | 2       | 3       | 4       |
|------------------------|---------|---------|---------|---------|
| fre(cm <sup>-1</sup> ) | 1778.36 | 1776.38 | 1804.94 | 1823.20 |
| T <sub>c</sub> (K)     | 407.73  | 407.27  | 413.82  | 418.01  |

|      |       |       |       |       |
|------|-------|-------|-------|-------|
| 300  | 45.79 | 47.30 | 53.39 | 54.97 |
| 400  | 8.76  | 9.26  | 10.14 | 10.42 |
| 500  | 4.06  | 4.28  | 4.53  | 4.72  |
| 600  | 2.66  | 2.77  | 2.88  | 3.00  |
| 700  | 2.06  | 2.13  | 2.18  | 2.27  |
| 800  | 1.74  | 1.79  | 1.82  | 1.88  |
| 900  | 1.55  | 1.58  | 1.61  | 1.65  |
| 1000 | 1.43  | 1.45  | 1.47  | 1.50  |
| 1100 | 1.34  | 1.36  | 1.37  | 1.40  |
| 1200 | 1.28  | 1.30  | 1.31  | 1.33  |
| 1300 | 1.24  | 1.25  | 1.26  | 1.28  |
| 1400 | 1.20  | 1.21  | 1.22  | 1.23  |
| 1500 | 1.17  | 1.18  | 1.19  | 1.20  |

**Table S14.** The magnitudes of imaginary frequencies (fre) of transition states along with their corresponding crossover temperatures ( $T_c$ ) and SCT tunneling transmission coefficients for every pathway of R3.

|                         | 1         | 2         | 3        | 4        | 5        | 6        | 7        | 8        | 9        | 10       |
|-------------------------|-----------|-----------|----------|----------|----------|----------|----------|----------|----------|----------|
| fre( $\text{cm}^{-1}$ ) | 1790.867  | 1784.1758 | 1787.01  | 1744.114 | 1760.323 | 1739.68  | 1786.655 | 1806.004 | 1803.132 | 1790.246 |
| $T_c$ (K)               | 410.60    | 409.06    | 409.71   | 399.88   | 403.59   | 398.86   | 409.63   | 414.07   | 413.41   | 410.45   |
| 300                     | 53.37     | 46.72     | 53.19    | 43.17    | 46.55    | 46.27    | 47.01    | 46.72    | 60.23    | 50.74    |
| 400                     | 8.53      | 8.40      | 8.77     | 8.19     | 8.80     | 8.69     | 8.02     | 8.40     | 8.77     | 8.41     |
| 500                     | 3.89      | 3.87      | 3.96     | 3.79     | 3.99     | 3.95     | 3.77     | 3.87     | 4.00     | 3.91     |
| 600                     | 2.55      | 2.55      | 2.59     | 2.50     | 2.60     | 2.57     | 2.52     | 2.55     | 2.62     | 2.58     |
| 700                     | 1.98      | 1.98      | 2.00     | 1.95     | 2.01     | 1.99     | 1.97     | 1.98     | 2.03     | 2.01     |
| 800                     | 1.68      | 1.68      | 1.70     | 1.66     | 1.70     | 1.69     | 1.68     | 1.68     | 1.72     | 1.71     |
| 900                     | 1.51      | 1.51      | 1.52     | 1.49     | 1.52     | 1.51     | 1.51     | 1.51     | 1.53     | 1.53     |
| 1000                    | 1.39      | 1.39      | 1.40     | 1.38     | 1.40     | 1.39     | 1.40     | 1.39     | 1.41     | 1.41     |
| 1100                    | 1.31      | 1.31      | 1.32     | 1.31     | 1.32     | 1.31     | 1.32     | 1.31     | 1.33     | 1.33     |
| 1200                    | 1.26      | 1.26      | 1.26     | 1.25     | 1.26     | 1.26     | 1.26     | 1.26     | 1.27     | 1.27     |
| 1300                    | 1.22      | 1.22      | 1.22     | 1.21     | 1.22     | 1.22     | 1.22     | 1.22     | 1.23     | 1.23     |
| 1400                    | 1.18      | 1.18      | 1.19     | 1.18     | 1.19     | 1.18     | 1.19     | 1.18     | 1.19     | 1.19     |
| 1500                    | 1.16      | 1.16      | 1.16     | 1.15     | 1.16     | 1.16     | 1.16     | 1.16     | 1.17     | 1.16     |
|                         | 11        | 12        | 13       | 14       | 15       | 16       | 17       | 18       | 19       | 20       |
| fre( $\text{cm}^{-1}$ ) | 1808.3392 | 1812.714  | 1780.452 | 1809.519 | 1787.88  | 1770.536 | 1767.776 | 1742.919 | 1752.376 | 1745.119 |
| $T_c$ (K)               | 414.60    | 415.61    | 408.21   | 414.87   | 409.91   | 405.93   | 405.30   | 399.60   | 401.77   | 400.11   |
| 300                     | 63.51     | 70.19     | 47.59    | 60.65    | 84.69    | 54.29    | 53.48    | 40.60    | 44.01    | 44.08    |
| 400                     | 8.74      | 8.77      | 8.21     | 8.44     | 9.20     | 8.23     | 8.99     | 8.07     | 8.64     | 8.49     |
| 500                     | 3.95      | 3.97      | 3.85     | 3.87     | 4.05     | 3.80     | 4.12     | 3.84     | 4.04     | 3.98     |
| 600                     | 2.59      | 2.61      | 2.56     | 2.56     | 2.63     | 2.52     | 2.69     | 2.56     | 2.65     | 2.62     |
| 700                     | 2.01      | 2.02      | 2.00     | 1.99     | 2.03     | 1.97     | 2.07     | 2.00     | 2.05     | 2.03     |
| 800                     | 1.71      | 1.71      | 1.70     | 1.69     | 1.72     | 1.68     | 1.75     | 1.70     | 1.74     | 1.72     |
| 900                     | 1.52      | 1.53      | 1.52     | 1.52     | 1.53     | 1.50     | 1.56     | 1.52     | 1.55     | 1.54     |
| 1000                    | 1.41      | 1.41      | 1.40     | 1.40     | 1.41     | 1.39     | 1.43     | 1.40     | 1.42     | 1.42     |
| 1100                    | 1.33      | 1.33      | 1.32     | 1.32     | 1.33     | 1.31     | 1.35     | 1.32     | 1.34     | 1.33     |

|                        |           |           |          |          |          |          |          |          |          |          |
|------------------------|-----------|-----------|----------|----------|----------|----------|----------|----------|----------|----------|
| 1200                   | 1.27      | 1.27      | 1.27     | 1.26     | 1.27     | 1.26     | 1.28     | 1.27     | 1.28     | 1.27     |
| 1300                   | 1.22      | 1.23      | 1.22     | 1.22     | 1.23     | 1.21     | 1.24     | 1.22     | 1.23     | 1.23     |
| 1400                   | 1.19      | 1.19      | 1.19     | 1.19     | 1.19     | 1.18     | 1.20     | 1.19     | 1.20     | 1.19     |
| 1500                   | 1.16      | 1.17      | 1.16     | 1.16     | 1.17     | 1.16     | 1.17     | 1.16     | 1.17     | 1.17     |
|                        | 21        | 22        | 23       | 24       | 25       | 26       | 27       | 28       | 29       | 30       |
| fre(cm <sup>-1</sup> ) | 1808.3455 | 1805.5755 | 1802.382 | 1826.416 | 1819.503 | 1824.167 | 1821.03  | 1831.351 | 1803.516 | 1877.664 |
| T <sub>c</sub> (K)     | 414.60    | 413.97    | 413.24   | 418.75   | 417.16   | 418.23   | 417.51   | 419.88   | 413.50   | 430.50   |
| 300                    | 39.05     | 43.92     | 42.80    | 55.25    | 49.68    | 79.80    | 60.30    | 80.30    | 75.42    | 197.07   |
| 400                    | 7.52      | 8.10      | 7.96     | 8.96     | 8.27     | 9.55     | 9.09     | 9.53     | 9.13     | 13.04    |
| 500                    | 3.59      | 3.80      | 3.74     | 4.03     | 3.82     | 4.08     | 4.03     | 4.11     | 4.00     | 4.76     |
| 600                    | 2.42      | 2.52      | 2.49     | 2.62     | 2.53     | 2.61     | 2.61     | 2.64     | 2.59     | 2.85     |
| 700                    | 1.91      | 1.97      | 1.95     | 2.02     | 1.97     | 2.01     | 2.01     | 2.03     | 2.00     | 2.12     |
| 800                    | 1.64      | 1.68      | 1.66     | 1.71     | 1.68     | 1.70     | 1.70     | 1.71     | 1.69     | 1.76     |
| 900                    | 1.47      | 1.51      | 1.49     | 1.53     | 1.50     | 1.51     | 1.52     | 1.53     | 1.51     | 1.56     |
| 1000                   | 1.37      | 1.39      | 1.38     | 1.41     | 1.39     | 1.40     | 1.40     | 1.41     | 1.40     | 1.43     |
| 1100                   | 1.30      | 1.31      | 1.31     | 1.33     | 1.31     | 1.32     | 1.32     | 1.33     | 1.32     | 1.34     |
| 1200                   | 1.24      | 1.26      | 1.25     | 1.27     | 1.26     | 1.26     | 1.26     | 1.27     | 1.26     | 1.28     |
| 1300                   | 1.20      | 1.22      | 1.21     | 1.22     | 1.21     | 1.22     | 1.22     | 1.22     | 1.22     | 1.23     |
| 1400                   | 1.17      | 1.18      | 1.18     | 1.19     | 1.18     | 1.18     | 1.19     | 1.19     | 1.18     | 1.20     |
| 1500                   | 1.15      | 1.16      | 1.15     | 1.16     | 1.16     | 1.16     | 1.16     | 1.16     | 1.16     | 1.17     |
| T(K)                   | 31        | 32        | 33       | 34       | 35       | 36       | 37       | 38       | 39       | 40       |
| fre(cm <sup>-1</sup> ) | 1875.2638 | 1874.0158 | 1872.057 | 1878.458 | 1876.715 | 1847.606 | 1865.308 | 1848.875 | 1853.208 | 1851.243 |
| T <sub>c</sub> (K)     | 429.95    | 429.66    | 429.21   | 430.68   | 430.28   | 423.61   | 427.66   | 423.90   | 424.89   | 424.44   |
| 300                    | 160.29    | 151.59    | 188.76   | 168.51   | 230.40   | 118.46   | 80.78    | 112.84   | 94.35    | 126.13   |
| 400                    | 12.82     | 12.13     | 12.59    | 13.85    | 12.98    | 10.92    | 10.29    | 10.77    | 10.67    | 11.66    |
| 500                    | 4.70      | 4.58      | 4.60     | 4.98     | 4.66     | 4.35     | 4.23     | 4.36     | 4.36     | 4.60     |
| 600                    | 2.82      | 2.78      | 2.78     | 2.94     | 2.79     | 2.71     | 2.65     | 2.72     | 2.72     | 2.83     |
| 700                    | 2.10      | 2.09      | 2.08     | 2.17     | 2.09     | 2.05     | 2.02     | 2.06     | 2.07     | 2.12     |
| 800                    | 1.75      | 1.74      | 1.74     | 1.79     | 1.74     | 1.72     | 1.70     | 1.73     | 1.73     | 1.77     |
| 900                    | 1.55      | 1.54      | 1.54     | 1.58     | 1.54     | 1.53     | 1.52     | 1.54     | 1.54     | 1.56     |
| 1000                   | 1.42      | 1.42      | 1.41     | 1.44     | 1.41     | 1.41     | 1.40     | 1.41     | 1.42     | 1.43     |
| 1100                   | 1.33      | 1.33      | 1.33     | 1.35     | 1.33     | 1.33     | 1.32     | 1.33     | 1.33     | 1.34     |
| 1200                   | 1.27      | 1.27      | 1.27     | 1.29     | 1.27     | 1.27     | 1.26     | 1.27     | 1.27     | 1.28     |
| 1300                   | 1.23      | 1.23      | 1.22     | 1.24     | 1.22     | 1.22     | 1.22     | 1.22     | 1.23     | 1.23     |
| 1400                   | 1.19      | 1.19      | 1.19     | 1.20     | 1.19     | 1.19     | 1.18     | 1.19     | 1.19     | 1.20     |
| 1500                   | 1.17      | 1.16      | 1.16     | 1.17     | 1.16     | 1.16     | 1.16     | 1.16     | 1.16     | 1.17     |
| T(K)                   | 41        | 42        | 43       |          |          |          |          |          |          |          |
| fre(cm <sup>-1</sup> ) | 1840.2793 | 1852.2051 | 1827.241 |          |          |          |          |          |          |          |
| T <sub>c</sub> (K)     | 421.93    | 424.66    | 418.94   |          |          |          |          |          |          |          |
| 300                    | 109.70    | 118.99    | 230.40   |          |          |          |          |          |          |          |
| 400                    | 10.36     | 11.69     | 12.98    |          |          |          |          |          |          |          |
| 500                    | 4.22      | 4.58      | 4.66     |          |          |          |          |          |          |          |
| 600                    | 2.65      | 2.81      | 2.79     |          |          |          |          |          |          |          |
| 700                    | 2.03      | 2.11      | 2.09     |          |          |          |          |          |          |          |

|      |      |      |      |
|------|------|------|------|
| 800  | 1.71 | 1.76 | 1.74 |
| 900  | 1.52 | 1.56 | 1.54 |
| 1000 | 1.40 | 1.43 | 1.41 |
| 1100 | 1.32 | 1.34 | 1.33 |
| 1200 | 1.26 | 1.28 | 1.27 |
| 1300 | 1.22 | 1.23 | 1.22 |
| 1400 | 1.19 | 1.20 | 1.19 |
| 1500 | 1.16 | 1.17 | 1.16 |

**Table S15.** The magnitudes of imaginary frequencies (fre) of transition states along with their corresponding crossover temperatures ( $T_c$ ) and SCT tunneling transmission coefficients for every pathway of R4.

|                         | 1       | 2       | 3       | 4       | 5       | 6       | 7       | 8       | 9       | 10      |
|-------------------------|---------|---------|---------|---------|---------|---------|---------|---------|---------|---------|
| fre( $\text{cm}^{-1}$ ) | 1900.21 | 1907.13 | 1903.32 | 1904.13 | 1901.67 | 1897.27 | 1907.37 | 1910.51 | 1911.09 | 1906.56 |
| $T_c$ (K)               | 435.67  | 437.25  | 436.38  | 436.56  | 436.00  | 434.99  | 437.31  | 438.03  | 438.16  | 437.12  |
| 300                     | 86.86   | 79.50   | 84.82   | 117.28  | 115.76  | 105.72  | 99.48   | 112.17  | 103.27  | 73.22   |
| 400                     | 11.21   | 11.34   | 10.76   | 11.63   | 12.54   | 10.48   | 11.72   | 13.22   | 11.35   | 10.26   |
| 500                     | 4.79    | 4.86    | 4.64    | 4.81    | 5.10    | 4.47    | 4.89    | 5.31    | 4.71    | 4.44    |
| 600                     | 3.03    | 3.06    | 2.96    | 3.02    | 3.16    | 2.86    | 3.06    | 3.24    | 2.96    | 2.83    |
| 700                     | 2.28    | 2.31    | 2.25    | 2.28    | 2.35    | 2.18    | 2.29    | 2.40    | 2.23    | 2.16    |
| 800                     | 1.90    | 1.91    | 1.87    | 1.89    | 1.94    | 1.82    | 1.90    | 1.97    | 1.86    | 1.81    |
| 900                     | 1.67    | 1.68    | 1.65    | 1.66    | 1.69    | 1.61    | 1.67    | 1.71    | 1.63    | 1.60    |
| 1000                    | 1.52    | 1.52    | 1.50    | 1.51    | 1.54    | 1.48    | 1.52    | 1.55    | 1.49    | 1.46    |
| 1100                    | 1.41    | 1.42    | 1.40    | 1.41    | 1.43    | 1.38    | 1.41    | 1.44    | 1.39    | 1.37    |
| 1200                    | 1.34    | 1.34    | 1.33    | 1.34    | 1.35    | 1.31    | 1.34    | 1.36    | 1.32    | 1.30    |
| 1300                    | 1.28    | 1.29    | 1.28    | 1.28    | 1.29    | 1.26    | 1.28    | 1.30    | 1.27    | 1.25    |
| 1400                    | 1.24    | 1.24    | 1.23    | 1.24    | 1.25    | 1.22    | 1.24    | 1.25    | 1.23    | 1.22    |
| 1500                    | 1.21    | 1.21    | 1.20    | 1.20    | 1.21    | 1.19    | 1.21    | 1.22    | 1.20    | 1.19    |
| $T$ (K)                 | 11      | 12      | 13      | 14      | 15      | 16      | 17      | 18      | 19      | 20      |
| fre( $\text{cm}^{-1}$ ) | 1899.50 | 1908.49 | 1841.64 | 1868.88 | 1922.30 | 1914.63 | 1879.71 | 1879.13 | 1873.10 | 1881.59 |
| $T_c$ (K)               | 435.50  | 437.56  | 422.24  | 428.48  | 440.73  | 438.97  | 430.97  | 430.83  | 429.45  | 431.40  |
| 300                     | 88.57   | 85.22   | 84.40   | 75.50   | 63.42   | 68.07   | 79.69   | 75.84   | 84.83   | 103.68  |
| 400                     | 12.52   | 11.55   | 9.88    | 10.48   | 10.50   | 10.58   | 12.87   | 11.53   | 12.68   | 12.62   |
| 500                     | 5.17    | 4.86    | 4.32    | 4.59    | 4.59    | 4.57    | 5.33    | 4.88    | 5.21    | 5.14    |
| 600                     | 3.18    | 3.04    | 2.79    | 2.93    | 2.91    | 2.89    | 3.25    | 3.04    | 3.18    | 3.16    |
| 700                     | 2.36    | 2.28    | 2.14    | 2.23    | 2.21    | 2.19    | 2.40    | 2.28    | 2.35    | 2.35    |
| 800                     | 1.94    | 1.89    | 1.80    | 1.86    | 1.84    | 1.83    | 1.96    | 1.88    | 1.93    | 1.93    |
| 900                     | 1.69    | 1.66    | 1.60    | 1.64    | 1.62    | 1.61    | 1.71    | 1.65    | 1.68    | 1.69    |
| 1000                    | 1.54    | 1.51    | 1.46    | 1.50    | 1.48    | 1.47    | 1.54    | 1.50    | 1.53    | 1.53    |
| 1100                    | 1.43    | 1.41    | 1.37    | 1.40    | 1.38    | 1.38    | 1.43    | 1.40    | 1.42    | 1.42    |
| 1200                    | 1.35    | 1.33    | 1.31    | 1.33    | 1.31    | 1.31    | 1.35    | 1.33    | 1.34    | 1.35    |
| 1300                    | 1.29    | 1.28    | 1.26    | 1.27    | 1.26    | 1.26    | 1.29    | 1.27    | 1.29    | 1.29    |
| 1400                    | 1.25    | 1.24    | 1.22    | 1.23    | 1.22    | 1.22    | 1.25    | 1.23    | 1.24    | 1.25    |
| 1500                    | 1.21    | 1.20    | 1.19    | 1.20    | 1.19    | 1.19    | 1.21    | 1.20    | 1.21    | 1.21    |
| $T$ (K)                 | 21      | 22      | 23      |         |         |         |         |         |         |         |

|                        |         |         |         |
|------------------------|---------|---------|---------|
| fre(cm <sup>-1</sup> ) | 1882.77 | 1889.82 | 1879.63 |
| T <sub>c</sub> (K)     | 431.67  | 433.28  | 430.95  |
| 300                    | 129.92  | 117.40  | 117.40  |
| 400                    | 13.57   | 12.85   | 12.85   |
| 500                    | 5.40    | 5.21    | 5.21    |
| 600                    | 3.29    | 3.20    | 3.20    |
| 700                    | 2.42    | 2.37    | 2.37    |
| 800                    | 1.98    | 1.95    | 1.95    |
| 900                    | 1.72    | 1.70    | 1.70    |
| 1000                   | 1.56    | 1.54    | 1.54    |
| 1100                   | 1.45    | 1.43    | 1.43    |
| 1200                   | 1.36    | 1.35    | 1.35    |
| 1300                   | 1.30    | 1.29    | 1.29    |
| 1400                   | 1.26    | 1.25    | 1.25    |
| 1500                   | 1.22    | 1.21    | 1.21    |

**(5) Multi-structure torsional anharmonicity factors and generalized transmission coefficients for R1-R4.**

**Table S16.** Multi-structure torsional anharmonicity factors ( $F_{act}$ ) and generalized transmission coefficients ( $\gamma$ ) for R1 and R2.

| T/K  | R1                                              |                                       | R2                                              |                                       |
|------|-------------------------------------------------|---------------------------------------|-------------------------------------------------|---------------------------------------|
|      | Multi-structure torsional anharmonicity factors | Generalized transmission coefficients | Multi-structure torsional anharmonicity factors | Generalized transmission coefficients |
| 300  | 0.1038                                          | 54.0226                               | 0.0225                                          | 39.8830                               |
| 400  | 0.0934                                          | 7.7354                                | 0.0184                                          | 7.5029                                |
| 500  | 0.0883                                          | 3.4671                                | 0.0158                                          | 3.3643                                |
| 600  | 0.0864                                          | 2.2586                                | 0.0141                                          | 2.1344                                |
| 700  | 0.0863                                          | 1.7451                                | 0.0128                                          | 1.6015                                |
| 800  | 0.0874                                          | 1.4760                                | 0.0120                                          | 1.3192                                |
| 900  | 0.0891                                          | 1.3138                                | 0.0114                                          | 1.1474                                |
| 1000 | 0.0914                                          | 1.2071                                | 0.0109                                          | 1.0341                                |
| 1100 | 0.0939                                          | 1.1322                                | 0.0105                                          | 0.9543                                |
| 1200 | 0.0967                                          | 1.0784                                | 0.0103                                          | 0.8966                                |
| 1300 | 0.0996                                          | 1.0371                                | 0.0101                                          | 0.8511                                |
| 1400 | 0.1025                                          | 1.0047                                | 0.0100                                          | 0.8158                                |
| 1500 | 0.1056                                          | 0.9790                                | 0.0099                                          | 0.7871                                |
| T/K  | R3                                              |                                       | R4                                              |                                       |
|      | Multi-structure torsional anharmonicity factors | Generalized transmission coefficients | Multi-structure torsional anharmonicity factors | Generalized transmission coefficients |
| 300  | 0.6334                                          | 44.8390                               | 0.7838                                          | 73.5949                               |
| 400  | 0.6660                                          | 8.3174                                | 0.7395                                          | 11.0816                               |
| 500  | 0.7206                                          | 3.8084                                | 0.7156                                          | 4.6401                                |

|      |        |        |        |        |
|------|--------|--------|--------|--------|
| 600  | 0.7811 | 2.4906 | 0.7039 | 2.8751 |
| 700  | 0.8394 | 1.9266 | 0.7006 | 2.1422 |
| 800  | 0.8913 | 1.6292 | 0.7034 | 1.7631 |
| 900  | 0.9352 | 1.4506 | 0.7103 | 1.5392 |
| 1000 | 0.9708 | 1.3336 | 0.7201 | 1.3945 |
| 1100 | 0.9985 | 1.2521 | 0.7318 | 1.2940 |
| 1200 | 1.0189 | 1.1927 | 0.7446 | 1.2221 |
| 1300 | 1.0330 | 1.1477 | 0.7578 | 1.1683 |
| 1400 | 1.0416 | 1.1126 | 0.7712 | 1.1260 |
| 1500 | 1.0456 | 1.0845 | 0.7843 | 1.0927 |

**(6) High-pressure limit rate constants of every pathway of R1-R4 calculated by using TST.**

**Table S17.** Rate constants for R1 with chair-eq transition states.

| T (K) | chair-eq |          |          |          |          |          |          |          |
|-------|----------|----------|----------|----------|----------|----------|----------|----------|
|       | 1        | 2        | 3        | 4        | 5        | 6        | 7        | 8        |
| 300   | 1.93E-04 | 2.65E-02 | 3.35E-05 | 1.82E-05 | 1.32E-03 | 4.41E-05 | 2.23E-03 | 2.55E-06 |
| 400   | 2.81E+00 | 1.17E+02 | 7.75E-01 | 4.68E-01 | 7.17E+00 | 8.21E-01 | 1.38E+01 | 1.02E-01 |
| 500   | 9.13E+02 | 1.86E+04 | 3.35E+02 | 2.15E+02 | 1.29E+03 | 3.10E+02 | 2.68E+03 | 6.12E+01 |
| 600   | 4.43E+04 | 5.60E+05 | 1.97E+04 | 1.32E+04 | 4.23E+04 | 1.66E+04 | 9.26E+04 | 4.49E+03 |
| 700   | 7.23E+05 | 6.52E+06 | 3.70E+05 | 2.53E+05 | 5.20E+05 | 2.90E+05 | 1.19E+06 | 9.84E+04 |
| 800   | 5.95E+06 | 4.18E+07 | 3.39E+06 | 2.36E+06 | 3.47E+06 | 2.52E+06 | 8.16E+06 | 1.01E+06 |
| 900   | 3.10E+07 | 1.79E+08 | 1.92E+07 | 1.36E+07 | 1.54E+07 | 1.37E+07 | 3.69E+07 | 6.29E+06 |
| 1000  | 1.17E+08 | 5.78E+08 | 7.75E+07 | 5.53E+07 | 5.09E+07 | 5.35E+07 | 1.25E+08 | 2.73E+07 |
| 1100  | 3.50E+08 | 1.52E+09 | 2.45E+08 | 1.76E+08 | 1.36E+08 | 1.64E+08 | 3.40E+08 | 9.16E+07 |
| 1200  | 8.74E+08 | 3.41E+09 | 6.41E+08 | 4.64E+08 | 3.12E+08 | 4.19E+08 | 7.88E+08 | 2.52E+08 |
| 1300  | 1.90E+09 | 6.80E+09 | 1.45E+09 | 1.06E+09 | 6.29E+08 | 9.32E+08 | 1.61E+09 | 5.97E+08 |
| 1400  | 3.73E+09 | 1.23E+10 | 2.95E+09 | 2.15E+09 | 1.15E+09 | 1.85E+09 | 2.98E+09 | 1.25E+09 |
| 1500  | 6.68E+09 | 2.06E+10 | 5.44E+09 | 3.99E+09 | 1.95E+09 | 3.37E+09 | 5.09E+09 | 2.39E+09 |

**Table S18.** Rate constants for R1 with boat-eq transition states.

| T (K) | boat-eq  |          |          |          |          |          |          |          |
|-------|----------|----------|----------|----------|----------|----------|----------|----------|
|       | 9        | 10       | 11       | 12       | 13       | 14       | 15       | 16       |
| 300   | 6.58E-08 | 6.03E-07 | 1.19E-08 | 7.56E-09 | 2.55E-07 | 2.27E-08 | 3.57E-07 | 9.93E-10 |
| 400   | 7.20E-03 | 2.91E-02 | 1.99E-03 | 1.39E-03 | 1.27E-02 | 3.13E-03 | 2.10E-02 | 2.75E-04 |
| 500   | 7.88E+00 | 1.95E+01 | 2.80E+00 | 2.08E+00 | 8.68E+00 | 3.92E+00 | 1.59E+01 | 5.26E-01 |
| 600   | 8.58E+02 | 1.54E+03 | 3.63E+02 | 2.80E+02 | 6.89E+02 | 4.69E+02 | 1.35E+03 | 8.33E+01 |
| 700   | 2.49E+04 | 3.56E+04 | 1.20E+04 | 9.46E+03 | 1.60E+04 | 1.46E+04 | 3.31E+04 | 3.17E+03 |
| 800   | 3.16E+05 | 3.82E+05 | 1.68E+05 | 1.35E+05 | 1.72E+05 | 1.94E+05 | 3.69E+05 | 4.95E+04 |
| 900   | 2.31E+06 | 2.45E+06 | 1.32E+06 | 1.07E+06 | 1.10E+06 | 1.47E+06 | 2.44E+06 | 4.24E+05 |
| 1000  | 1.14E+07 | 1.09E+07 | 6.95E+06 | 5.70E+06 | 4.91E+06 | 7.52E+06 | 1.11E+07 | 2.38E+06 |
| 1100  | 4.25E+07 | 3.73E+07 | 2.72E+07 | 2.25E+07 | 1.68E+07 | 2.87E+07 | 3.89E+07 | 9.86E+06 |
| 1200  | 1.28E+08 | 1.04E+08 | 8.53E+07 | 7.09E+07 | 4.69E+07 | 8.82E+07 | 1.11E+08 | 3.24E+07 |
| 1300  | 3.25E+08 | 2.50E+08 | 2.25E+08 | 1.88E+08 | 1.13E+08 | 2.29E+08 | 2.69E+08 | 8.88E+07 |
| 1400  | 7.27E+08 | 5.32E+08 | 5.20E+08 | 4.35E+08 | 2.39E+08 | 5.19E+08 | 5.79E+08 | 2.12E+08 |

1500 1.46E+09 1.02E+09 1.08E+09 9.03E+08 4.60E+08 1.06E+09 1.13E+09 4.51E+08

**Table S19.** Rate constants for R1 with chair-ax transition states.

| T (K) | chair-ax |          |          |          |          |          |          |          |
|-------|----------|----------|----------|----------|----------|----------|----------|----------|
|       | 17       | 18       | 19       | 20       | 21       | 22       | 23       | 24       |
| 300   | 2.39E-03 | 2.32E-04 | 1.15E-04 | 4.03E-04 | 1.10E-05 | 4.97E-06 | 4.18E-05 | 1.13E-05 |
| 400   | 1.54E+01 | 2.94E+00 | 1.43E+00 | 3.71E+00 | 2.77E-01 | 1.07E-01 | 7.28E-01 | 1.99E-01 |
| 500   | 3.06E+03 | 8.84E+02 | 4.21E+02 | 9.15E+02 | 1.25E+02 | 4.42E+01 | 2.64E+02 | 7.29E+01 |
| 600   | 1.07E+05 | 4.09E+04 | 1.92E+04 | 3.69E+04 | 7.60E+03 | 2.52E+03 | 1.38E+04 | 3.84E+03 |
| 700   | 1.38E+06 | 6.45E+05 | 2.99E+05 | 5.28E+05 | 1.46E+05 | 4.63E+04 | 2.39E+05 | 6.65E+04 |
| 800   | 9.57E+06 | 5.20E+06 | 2.38E+06 | 3.94E+06 | 1.36E+06 | 4.16E+05 | 2.06E+06 | 5.74E+05 |
| 900   | 4.35E+07 | 2.67E+07 | 1.21E+07 | 1.90E+07 | 7.80E+06 | 2.33E+06 | 1.11E+07 | 3.10E+06 |
| 1000  | 1.47E+08 | 9.94E+07 | 4.46E+07 | 6.76E+07 | 3.19E+07 | 9.30E+06 | 4.33E+07 | 1.21E+07 |
| 1100  | 4.02E+08 | 2.94E+08 | 1.31E+08 | 1.92E+08 | 1.02E+08 | 2.91E+07 | 1.32E+08 | 3.69E+07 |
| 1200  | 9.34E+08 | 7.30E+08 | 3.23E+08 | 4.61E+08 | 2.68E+08 | 7.56E+07 | 3.38E+08 | 9.41E+07 |
| 1300  | 1.91E+09 | 1.58E+09 | 6.95E+08 | 9.69E+08 | 6.12E+08 | 1.70E+08 | 7.49E+08 | 2.09E+08 |
| 1400  | 3.54E+09 | 3.08E+09 | 1.34E+09 | 1.84E+09 | 1.25E+09 | 3.43E+08 | 1.49E+09 | 4.14E+08 |
| 1500  | 6.06E+09 | 5.49E+09 | 2.39E+09 | 3.21E+09 | 2.31E+09 | 6.29E+08 | 2.70E+09 | 7.52E+08 |

**Table S20.** Rate constants for R1 with boat-ax transition states.

| T (K) | boat-ax  |          |          |          |          |          |
|-------|----------|----------|----------|----------|----------|----------|
|       | 25       | 26       | 27       | 28       | 29       | 30       |
| 300   | 4.11E-06 | 1.62E-07 | 3.08E-07 | 1.90E-05 | 1.57E-07 | 5.11E-09 |
| 400   | 1.44E-01 | 1.98E-02 | 1.56E-02 | 3.70E-01 | 1.03E-02 | 9.28E-04 |
| 500   | 7.92E+01 | 2.31E+01 | 1.06E+01 | 1.44E+02 | 8.33E+00 | 1.38E+00 |
| 600   | 5.45E+03 | 2.65E+03 | 8.47E+02 | 7.89E+03 | 7.40E+02 | 1.85E+02 |
| 700   | 1.14E+05 | 8.00E+04 | 1.97E+04 | 1.41E+05 | 1.86E+04 | 6.26E+03 |
| 800   | 1.14E+06 | 1.05E+06 | 2.12E+05 | 1.24E+06 | 2.12E+05 | 8.94E+04 |
| 900   | 6.86E+06 | 7.86E+06 | 1.36E+06 | 6.81E+06 | 1.42E+06 | 7.16E+05 |
| 1000  | 2.91E+07 | 3.97E+07 | 6.05E+06 | 2.69E+07 | 6.59E+06 | 3.82E+06 |
| 1100  | 9.58E+07 | 1.51E+08 | 2.07E+07 | 8.31E+07 | 2.32E+07 | 1.51E+07 |
| 1200  | 2.59E+08 | 4.60E+08 | 5.78E+07 | 2.14E+08 | 6.67E+07 | 4.79E+07 |
| 1300  | 6.05E+08 | 1.19E+09 | 1.39E+08 | 4.79E+08 | 1.63E+08 | 1.28E+08 |
| 1400  | 1.26E+09 | 2.69E+09 | 2.95E+08 | 9.57E+08 | 3.54E+08 | 2.96E+08 |
| 1500  | 2.37E+09 | 5.47E+09 | 5.67E+08 | 1.75E+09 | 6.92E+08 | 6.17E+08 |

**Table S21.** Rate constants of every pathway of R2.

| T (K) | BC-eq    | TBC-eq   | BC-ax    | TBC-ax   |
|-------|----------|----------|----------|----------|
|       | 1        | 2        | 3        | 4        |
| 300   | 3.75E-03 | 3.34E-03 | 1.62E-04 | 1.71E-04 |
| 400   | 1.28E+01 | 1.51E+01 | 1.08E+00 | 1.72E+00 |
| 500   | 1.74E+03 | 2.44E+03 | 2.21E+02 | 4.50E+02 |
| 600   | 4.71E+04 | 7.46E+04 | 7.88E+03 | 1.90E+04 |
| 700   | 5.08E+05 | 8.76E+05 | 1.03E+05 | 2.81E+05 |
| 800   | 3.06E+06 | 5.65E+06 | 7.23E+05 | 2.16E+06 |
| 900   | 1.25E+07 | 2.43E+07 | 3.33E+06 | 1.07E+07 |
| 1000  | 3.91E+07 | 7.91E+07 | 1.14E+07 | 3.87E+07 |

|      |          |          |          |          |
|------|----------|----------|----------|----------|
| 1100 | 9.97E+07 | 2.09E+08 | 3.13E+07 | 1.12E+08 |
| 1200 | 2.19E+08 | 4.71E+08 | 7.33E+07 | 2.72E+08 |
| 1300 | 4.27E+08 | 9.42E+08 | 1.51E+08 | 5.80E+08 |
| 1400 | 7.60E+08 | 1.71E+09 | 2.81E+08 | 1.11E+09 |
| 1500 | 1.26E+09 | 2.88E+09 | 4.84E+08 | 1.97E+09 |

**Table S22.** Rate constants of every pathway of R3 with chair-eq1-ax2 transition states.

| T (K) | 1        | 2        | 3        | 4        | 5        | 6        |
|-------|----------|----------|----------|----------|----------|----------|
| 300   | 2.94E-07 | 6.27E-06 | 3.03E-07 | 1.46E-05 | 1.78E-04 | 9.69E-06 |
| 400   | 1.12E-02 | 1.19E-01 | 1.03E-02 | 1.82E-01 | 1.26E+00 | 1.22E-01 |
| 500   | 6.50E+00 | 4.53E+01 | 5.56E+00 | 5.39E+01 | 2.63E+02 | 3.60E+01 |
| 600   | 4.63E+02 | 2.44E+03 | 3.78E+02 | 2.45E+03 | 9.51E+03 | 1.64E+03 |
| 700   | 9.96E+03 | 4.30E+04 | 7.87E+03 | 3.83E+04 | 1.26E+05 | 2.55E+04 |
| 800   | 1.01E+05 | 3.75E+05 | 7.78E+04 | 3.06E+05 | 8.85E+05 | 2.03E+05 |
| 900   | 6.19E+05 | 2.04E+06 | 4.68E+05 | 1.55E+06 | 4.08E+06 | 1.03E+06 |
| 1000  | 2.66E+06 | 8.01E+06 | 1.99E+06 | 5.76E+06 | 1.40E+07 | 3.83E+06 |
| 1100  | 8.86E+06 | 2.47E+07 | 6.52E+06 | 1.69E+07 | 3.86E+07 | 1.12E+07 |
| 1200  | 2.42E+07 | 6.33E+07 | 1.76E+07 | 4.18E+07 | 9.04E+07 | 2.77E+07 |
| 1300  | 5.70E+07 | 1.41E+08 | 4.11E+07 | 9.02E+07 | 1.86E+08 | 5.98E+07 |
| 1400  | 1.19E+08 | 2.82E+08 | 8.53E+07 | 1.75E+08 | 3.48E+08 | 1.16E+08 |
| 1500  | 2.26E+08 | 5.13E+08 | 1.61E+08 | 3.11E+08 | 5.99E+08 | 2.06E+08 |

**Table S23.** Rate constants of every pathway of R3 with chair-ax1-eq2 transition states.

| T (K) | 7        | 8        | 9        | 10       | 11       | 12       | 13       | 14       | 15       |
|-------|----------|----------|----------|----------|----------|----------|----------|----------|----------|
| 300   | 7.78E-06 | 6.95E-07 | 1.96E-07 | 8.06E-07 | 1.19E-07 | 6.00E-09 | 9.29E-07 | 7.71E-08 | 1.71E-08 |
| 400   | 1.60E-01 | 2.41E-02 | 9.31E-03 | 2.17E-02 | 6.09E-03 | 5.50E-04 | 2.46E-02 | 4.38E-03 | 1.31E-03 |
| 500   | 6.42E+01 | 1.31E+01 | 6.16E+00 | 1.02E+01 | 4.20E+00 | 5.38E-01 | 1.15E+01 | 3.22E+00 | 1.16E+00 |
| 600   | 3.59E+03 | 9.01E+02 | 4.81E+02 | 6.36E+02 | 3.37E+02 | 5.45E+01 | 7.09E+02 | 2.70E+02 | 1.09E+02 |
| 700   | 6.49E+04 | 1.88E+04 | 1.10E+04 | 1.24E+04 | 7.89E+03 | 1.50E+03 | 1.38E+04 | 6.51E+03 | 2.87E+03 |
| 800   | 5.79E+05 | 1.87E+05 | 1.17E+05 | 1.17E+05 | 8.53E+04 | 1.84E+04 | 1.30E+05 | 7.20E+04 | 3.38E+04 |
| 900   | 3.21E+06 | 1.12E+06 | 7.45E+05 | 6.82E+05 | 5.49E+05 | 1.31E+05 | 7.52E+05 | 4.72E+05 | 2.33E+05 |
| 1000  | 1.27E+07 | 4.77E+06 | 3.31E+06 | 2.81E+06 | 2.46E+06 | 6.31E+05 | 3.09E+06 | 2.14E+06 | 1.10E+06 |
| 1100  | 3.97E+07 | 1.57E+07 | 1.13E+07 | 9.02E+06 | 8.44E+06 | 2.31E+06 | 9.90E+06 | 7.44E+06 | 3.96E+06 |
| 1200  | 1.03E+08 | 4.25E+07 | 3.14E+07 | 2.40E+07 | 2.37E+07 | 6.84E+06 | 2.63E+07 | 2.11E+07 | 1.16E+07 |
| 1300  | 2.31E+08 | 9.91E+07 | 7.52E+07 | 5.50E+07 | 5.70E+07 | 1.72E+07 | 6.02E+07 | 5.12E+07 | 2.87E+07 |
| 1400  | 4.63E+08 | 2.05E+08 | 1.59E+08 | 1.12E+08 | 1.21E+08 | 3.80E+07 | 1.23E+08 | 1.10E+08 | 6.29E+07 |
| 1500  | 8.48E+08 | 3.88E+08 | 3.06E+08 | 2.09E+08 | 2.34E+08 | 7.59E+07 | 2.29E+08 | 2.13E+08 | 1.24E+08 |

**Table S24.** Rate constants of every pathway of R3 with chair-ax1-ax2 transition states.

| T (K) | 16       | 17       | 18       | 19       | 20       |
|-------|----------|----------|----------|----------|----------|
| 300   | 6.19E-08 | 2.95E-07 | 1.12E-06 | 1.45E-05 | 5.26E-07 |
| 400   | 4.01E-03 | 9.77E-03 | 2.61E-02 | 2.00E-01 | 1.37E-02 |
| 500   | 3.18E+00 | 5.19E+00 | 1.13E+01 | 6.26E+01 | 6.27E+00 |
| 600   | 2.81E+02 | 3.49E+02 | 6.61E+02 | 2.96E+03 | 3.83E+02 |
| 700   | 7.04E+03 | 7.22E+03 | 1.24E+04 | 4.76E+04 | 7.37E+03 |
| 800   | 8.01E+04 | 7.10E+04 | 1.13E+05 | 3.88E+05 | 6.88E+04 |



|      |          |          |          |          |          |
|------|----------|----------|----------|----------|----------|
| 900  | 5.38E+05 | 4.25E+05 | 6.39E+05 | 2.01E+06 | 3.95E+05 |
| 1000 | 2.49E+06 | 1.80E+06 | 2.58E+06 | 7.54E+06 | 1.62E+06 |
| 1100 | 8.78E+06 | 5.89E+06 | 8.14E+06 | 2.24E+07 | 5.15E+06 |
| 1200 | 2.53E+07 | 1.59E+07 | 2.13E+07 | 5.59E+07 | 1.36E+07 |
| 1300 | 6.20E+07 | 3.70E+07 | 4.83E+07 | 1.22E+08 | 3.11E+07 |
| 1400 | 1.34E+08 | 7.67E+07 | 9.78E+07 | 2.38E+08 | 6.33E+07 |
| 1500 | 2.63E+08 | 1.45E+08 | 1.81E+08 | 4.26E+08 | 1.18E+08 |

**Table S25.** Rate constants of every pathway of R3 with chair-eq1-eq2 transition states.

| T<br>(K) | 21       | 22       | 23       | 24       | 25       | 26       | 27       | 28       |
|----------|----------|----------|----------|----------|----------|----------|----------|----------|
| 300      | 8.74E-05 | 1.05E-05 | 1.03E-05 | 9.52E-06 | 1.54E-06 | 3.53E-07 | 2.80E-06 | 1.24E-07 |
| 400      | 1.01E+00 | 1.61E-01 | 1.52E-01 | 1.72E-01 | 4.11E-02 | 1.34E-02 | 6.95E-02 | 5.99E-03 |
| 500      | 2.85E+02 | 5.42E+01 | 5.02E+01 | 6.37E+01 | 1.92E+01 | 7.70E+00 | 3.11E+01 | 4.00E+00 |
| 600      | 1.26E+04 | 2.69E+03 | 2.46E+03 | 3.36E+03 | 1.18E+03 | 5.45E+02 | 1.86E+03 | 3.13E+02 |
| 700      | 1.92E+05 | 4.47E+04 | 4.04E+04 | 5.82E+04 | 2.29E+04 | 1.17E+04 | 3.53E+04 | 7.20E+03 |
| 800      | 1.51E+06 | 3.74E+05 | 3.35E+05 | 5.01E+05 | 2.14E+05 | 1.17E+05 | 3.25E+05 | 7.66E+04 |
| 900      | 7.58E+06 | 1.97E+06 | 1.76E+06 | 2.70E+06 | 1.23E+06 | 7.16E+05 | 1.85E+06 | 4.88E+05 |
| 1000     | 2.78E+07 | 7.52E+06 | 6.68E+06 | 1.05E+07 | 5.05E+06 | 3.07E+06 | 7.50E+06 | 2.16E+06 |
| 1100     | 8.10E+07 | 2.26E+07 | 2.00E+07 | 3.21E+07 | 1.61E+07 | 1.02E+07 | 2.37E+07 | 7.36E+06 |
| 1200     | 1.99E+08 | 5.70E+07 | 5.03E+07 | 8.17E+07 | 4.26E+07 | 2.77E+07 | 6.23E+07 | 2.05E+07 |
| 1300     | 4.26E+08 | 1.25E+08 | 1.10E+08 | 1.81E+08 | 9.73E+07 | 6.49E+07 | 1.41E+08 | 4.91E+07 |
| 1400     | 8.22E+08 | 2.46E+08 | 2.16E+08 | 3.59E+08 | 1.98E+08 | 1.35E+08 | 2.87E+08 | 1.04E+08 |
| 1500     | 1.46E+09 | 4.44E+08 | 3.89E+08 | 6.52E+08 | 3.68E+08 | 2.56E+08 | 5.31E+08 | 2.00E+08 |

**Table S26.** Rate constants of every pathway of R3 with boat-eq1 transition states.

| T<br>(K) | 29       | 30       | 31       | 32       | 33       | 34       | 35       | 36       |
|----------|----------|----------|----------|----------|----------|----------|----------|----------|
| 300      | 8.69E-09 | 7.83E-08 | 1.13E-08 | 4.79E-08 | 2.08E-07 | 8.89E-09 | 7.27E-08 | 3.87E-07 |
| 400      | 9.41E-04 | 4.97E-03 | 1.03E-03 | 3.52E-03 | 1.09E-02 | 1.07E-03 | 4.19E-03 | 1.51E-02 |
| 500      | 1.02E+00 | 3.89E+00 | 1.01E+00 | 3.02E+00 | 7.58E+00 | 1.23E+00 | 3.11E+00 | 8.83E+00 |
| 600      | 1.10E+02 | 3.39E+02 | 1.02E+02 | 2.79E+02 | 6.11E+02 | 1.39E+02 | 2.63E+02 | 6.35E+02 |
| 700      | 3.18E+03 | 8.39E+03 | 2.80E+03 | 7.21E+03 | 1.43E+04 | 4.12E+03 | 6.38E+03 | 1.37E+04 |
| 800      | 4.03E+04 | 9.45E+04 | 3.41E+04 | 8.39E+04 | 1.55E+05 | 5.33E+04 | 7.09E+04 | 1.40E+05 |
| 900      | 2.93E+05 | 6.28E+05 | 2.41E+05 | 5.73E+05 | 9.97E+05 | 3.94E+05 | 4.67E+05 | 8.58E+05 |
| 1000     | 1.45E+06 | 2.88E+06 | 1.16E+06 | 2.68E+06 | 4.46E+06 | 1.97E+06 | 2.13E+06 | 3.70E+06 |
| 1100     | 5.38E+06 | 1.01E+07 | 4.25E+06 | 9.56E+06 | 1.53E+07 | 7.40E+06 | 7.42E+06 | 1.23E+07 |
| 1200     | 1.61E+07 | 2.88E+07 | 1.26E+07 | 2.77E+07 | 4.29E+07 | 2.24E+07 | 2.11E+07 | 3.37E+07 |
| 1300     | 4.11E+07 | 7.03E+07 | 3.16E+07 | 6.84E+07 | 1.03E+08 | 5.74E+07 | 5.14E+07 | 7.94E+07 |
| 1400     | 9.18E+07 | 1.51E+08 | 6.98E+07 | 1.49E+08 | 2.20E+08 | 1.29E+08 | 1.10E+08 | 1.66E+08 |
| 1500     | 1.85E+08 | 2.95E+08 | 1.39E+08 | 2.93E+08 | 4.24E+08 | 2.61E+08 | 2.15E+08 | 3.15E+08 |

**Table S27.** Rate constants of every pathway of R3 with boat-ax1 transition states.

| T<br>(K) | 37       | 38       | 39       | 40       | 41       | 42       | 43       |
|----------|----------|----------|----------|----------|----------|----------|----------|
| 300      | 3.52E-09 | 2.87E-08 | 5.03E-09 | 1.82E-08 | 9.87E-08 | 1.08E-06 | 3.52E-09 |
| 400      | 4.47E-04 | 2.11E-03 | 5.36E-04 | 1.57E-03 | 5.94E-03 | 3.23E-02 | 4.47E-04 |

|      |          |          |          |          |          |          |          |
|------|----------|----------|----------|----------|----------|----------|----------|
| 500  | 5.33E-01 | 1.81E+00 | 5.74E-01 | 1.49E+00 | 4.52E+00 | 1.62E+01 | 5.33E-01 |
| 600  | 6.15E+01 | 1.68E+02 | 6.17E+01 | 1.47E+02 | 3.86E+02 | 1.05E+03 | 6.15E+01 |
| 700  | 1.87E+03 | 4.35E+03 | 1.78E+03 | 3.99E+03 | 9.44E+03 | 2.10E+04 | 1.87E+03 |
| 800  | 2.45E+04 | 5.06E+04 | 2.25E+04 | 4.82E+04 | 1.05E+05 | 2.02E+05 | 2.45E+04 |
| 900  | 1.84E+05 | 3.46E+05 | 1.64E+05 | 3.39E+05 | 6.97E+05 | 1.18E+06 | 1.84E+05 |
| 1000 | 9.29E+05 | 1.62E+06 | 8.07E+05 | 1.63E+06 | 3.18E+06 | 4.93E+06 | 9.29E+05 |
| 1100 | 3.52E+06 | 5.79E+06 | 3.00E+06 | 5.91E+06 | 1.11E+07 | 1.59E+07 | 3.52E+06 |
| 1200 | 1.08E+07 | 1.68E+07 | 9.02E+06 | 1.74E+07 | 3.16E+07 | 4.25E+07 | 1.08E+07 |
| 1300 | 2.78E+07 | 4.15E+07 | 2.30E+07 | 4.37E+07 | 7.70E+07 | 9.80E+07 | 2.78E+07 |
| 1400 | 6.28E+07 | 9.04E+07 | 5.13E+07 | 9.62E+07 | 1.66E+08 | 2.01E+08 | 6.28E+07 |
| 1500 | 1.28E+08 | 1.78E+08 | 1.03E+08 | 1.91E+08 | 3.23E+08 | 3.76E+08 | 1.28E+08 |

**Table S28.** Rate constants of every pathway of R4 with chair-eq1 transition states.

| T<br>(K) | 1        | 2        | 3        | 4        | 5        | 6        | 7        | 8        | 9        |
|----------|----------|----------|----------|----------|----------|----------|----------|----------|----------|
| 300      | 3.14E-10 | 2.43E-09 | 9.30E-11 | 1.68E-11 | 2.30E-10 | 1.01E-11 | 1.08E-10 | 7.77E-10 | 3.37E-11 |
| 400      | 5.20E-05 | 2.92E-04 | 1.83E-05 | 5.48E-06 | 4.40E-05 | 4.23E-06 | 2.28E-05 | 1.10E-04 | 9.42E-06 |
| 500      | 7.28E-02 | 3.36E-01 | 2.83E-02 | 1.14E-02 | 6.68E-02 | 1.03E-02 | 3.69E-02 | 1.39E-01 | 1.79E-02 |
| 600      | 9.40E+00 | 3.80E+01 | 3.91E+00 | 1.92E+00 | 9.07E+00 | 1.92E+00 | 5.22E+00 | 1.67E+01 | 2.83E+00 |
| 700      | 3.10E+02 | 1.14E+03 | 1.35E+02 | 7.64E+01 | 3.09E+02 | 8.22E+01 | 1.84E+02 | 5.24E+02 | 1.08E+02 |
| 800      | 4.34E+03 | 1.49E+04 | 1.96E+03 | 1.23E+03 | 4.44E+03 | 1.40E+03 | 2.70E+03 | 7.05E+03 | 1.68E+03 |
| 900      | 3.43E+04 | 1.11E+05 | 1.59E+04 | 1.08E+04 | 3.57E+04 | 1.29E+04 | 2.21E+04 | 5.40E+04 | 1.44E+04 |
| 1000     | 1.81E+05 | 5.60E+05 | 8.56E+04 | 6.23E+04 | 1.91E+05 | 7.67E+04 | 1.20E+05 | 2.78E+05 | 8.08E+04 |
| 1100     | 7.12E+05 | 2.12E+06 | 3.43E+05 | 2.63E+05 | 7.62E+05 | 3.33E+05 | 4.85E+05 | 1.07E+06 | 3.35E+05 |
| 1200     | 2.24E+06 | 6.47E+06 | 1.09E+06 | 8.77E+05 | 2.42E+06 | 1.14E+06 | 1.56E+06 | 3.30E+06 | 1.10E+06 |
| 1300     | 5.95E+06 | 1.67E+07 | 2.94E+06 | 2.44E+06 | 6.47E+06 | 3.24E+06 | 4.19E+06 | 8.62E+06 | 3.03E+06 |
| 1400     | 1.38E+07 | 3.78E+07 | 6.87E+06 | 5.90E+06 | 1.51E+07 | 7.96E+06 | 9.85E+06 | 1.97E+07 | 7.23E+06 |
| 1500     | 2.86E+07 | 7.70E+07 | 1.44E+07 | 1.27E+07 | 3.15E+07 | 1.74E+07 | 2.07E+07 | 4.04E+07 | 1.54E+07 |

**Table S29.** Rate constants of every pathway of R4 with twist-chair transition states.

| T<br>(K) | 10       | 11       | 12       | 13       | 14       | 15       | 16       |
|----------|----------|----------|----------|----------|----------|----------|----------|
| 300      | 2.88E-10 | 2.87E-09 | 3.56E-10 | 5.36E-12 | 1.06E-10 | 8.15E-09 | 1.31E-09 |
| 400      | 4.91E-05 | 2.92E-04 | 5.99E-05 | 1.77E-06 | 1.98E-05 | 6.23E-04 | 1.44E-04 |
| 500      | 6.96E-02 | 3.04E-01 | 8.44E-02 | 3.73E-03 | 2.96E-02 | 5.47E-01 | 1.58E-01 |
| 600      | 9.04E+00 | 3.21E+01 | 1.09E+01 | 6.32E-01 | 3.98E+00 | 5.16E+01 | 1.72E+01 |
| 700      | 2.99E+02 | 9.16E+02 | 3.61E+02 | 2.53E+01 | 1.35E+02 | 1.36E+03 | 5.03E+02 |
| 800      | 4.20E+03 | 1.15E+04 | 5.06E+03 | 4.11E+02 | 1.94E+03 | 1.61E+04 | 6.44E+03 |
| 900      | 3.33E+04 | 8.34E+04 | 4.00E+04 | 3.64E+03 | 1.56E+04 | 1.11E+05 | 4.74E+04 |
| 1000     | 1.76E+05 | 4.11E+05 | 2.11E+05 | 2.10E+04 | 8.34E+04 | 5.29E+05 | 2.37E+05 |
| 1100     | 6.92E+05 | 1.53E+06 | 8.30E+05 | 8.91E+04 | 3.32E+05 | 1.91E+06 | 8.88E+05 |
| 1200     | 2.18E+06 | 4.59E+06 | 2.61E+06 | 2.98E+05 | 1.05E+06 | 5.59E+06 | 2.69E+06 |
| 1300     | 5.78E+06 | 1.17E+07 | 6.93E+06 | 8.34E+05 | 2.82E+06 | 1.39E+07 | 6.90E+06 |
| 1400     | 1.34E+07 | 2.62E+07 | 1.60E+07 | 2.02E+06 | 6.56E+06 | 3.06E+07 | 1.55E+07 |
| 1500     | 2.78E+07 | 5.28E+07 | 3.33E+07 | 4.36E+06 | 1.37E+07 | 6.08E+07 | 3.15E+07 |

**Table S30.** Rate constants of every pathway of R4 with chair-ax transition states.

| T<br>(K) | 17       | 18       | 19       | 20       | 21       | 22       | 23       |
|----------|----------|----------|----------|----------|----------|----------|----------|
| 300      | 4.90E-09 | 2.71E-10 | 2.07E-10 | 1.97E-10 | 8.51E-12 | 7.73E-12 | 7.15E-15 |
| 400      | 3.82E-04 | 4.27E-05 | 2.99E-05 | 3.77E-05 | 3.22E-06 | 2.83E-06 | 1.43E-08 |
| 500      | 3.38E-01 | 5.78E-02 | 3.82E-02 | 5.72E-02 | 7.33E-03 | 6.32E-03 | 8.90E-05 |
| 600      | 3.20E+01 | 7.26E+00 | 4.63E+00 | 7.77E+00 | 1.31E+00 | 1.11E+00 | 3.09E-02 |
| 700      | 8.45E+02 | 2.35E+02 | 1.45E+02 | 2.65E+02 | 5.41E+01 | 4.56E+01 | 2.06E+00 |
| 800      | 1.00E+04 | 3.24E+03 | 1.97E+03 | 3.80E+03 | 8.98E+02 | 7.54E+02 | 4.89E+01 |
| 900      | 6.94E+04 | 2.53E+04 | 1.51E+04 | 3.06E+04 | 8.10E+03 | 6.76E+03 | 5.82E+02 |
| 1000     | 3.30E+05 | 1.32E+05 | 7.78E+04 | 1.64E+05 | 4.75E+04 | 3.95E+04 | 4.26E+03 |
| 1100     | 1.19E+06 | 5.16E+05 | 3.00E+05 | 6.53E+05 | 2.03E+05 | 1.69E+05 | 2.19E+04 |
| 1200     | 3.49E+06 | 1.61E+06 | 9.28E+05 | 2.07E+06 | 6.88E+05 | 5.69E+05 | 8.61E+04 |
| 1300     | 8.70E+06 | 4.25E+06 | 2.43E+06 | 5.55E+06 | 1.94E+06 | 1.60E+06 | 2.76E+05 |
| 1400     | 1.91E+07 | 9.79E+06 | 5.55E+06 | 1.29E+07 | 4.72E+06 | 3.90E+06 | 7.49E+05 |
| 1500     | 3.79E+07 | 2.02E+07 | 1.14E+07 | 2.70E+07 | 1.03E+07 | 8.45E+06 | 1.79E+06 |

**(7) High-pressure limit rate constants of R1-R4 using MS-TST/ZCT**

**Table S31.** Rate constants of R1 using MS-TST/ZCT.

| T (K) | chair-eq | boat-eq  | chair-ax | boat-ax  | total    |
|-------|----------|----------|----------|----------|----------|
| 300   | 8.60E-04 | 1.43E-07 | 1.21E-03 | 1.55E-07 | 1.03E-03 |
| 400   | 1.52E+00 | 2.09E-03 | 2.00E+00 | 1.77E-03 | 2.06E+00 |
| 500   | 1.53E+02 | 7.91E-01 | 2.00E+02 | 5.86E-01 | 2.33E+02 |
| 600   | 3.57E+03 | 4.54E+01 | 4.66E+03 | 3.09E+01 | 6.00E+03 |
| 700   | 3.56E+04 | 8.67E+02 | 4.61E+04 | 5.53E+02 | 6.46E+04 |
| 800   | 2.07E+05 | 8.22E+03 | 2.65E+05 | 5.00E+03 | 4.01E+05 |
| 900   | 8.39E+05 | 4.85E+04 | 1.05E+06 | 2.84E+04 | 1.71E+06 |
| 1000  | 2.62E+06 | 2.04E+05 | 3.21E+06 | 1.16E+05 | 5.55E+06 |
| 1100  | 6.74E+06 | 6.70E+05 | 8.11E+06 | 3.74E+05 | 1.48E+07 |
| 1200  | 1.50E+07 | 1.82E+06 | 1.77E+07 | 1.00E+06 | 3.41E+07 |
| 1300  | 2.98E+07 | 4.29E+06 | 3.44E+07 | 2.32E+06 | 6.96E+07 |
| 1400  | 5.41E+07 | 8.98E+06 | 6.13E+07 | 4.81E+06 | 1.29E+08 |
| 1500  | 9.12E+07 | 1.71E+07 | 1.02E+08 | 9.10E+06 | 2.23E+08 |

**Table S32.** Rate constants of R2 using MS-TST/ZCT.

| T (K) | BC-eq    | TBC-eq   | BC-ax    | TBC-ax   | total    |
|-------|----------|----------|----------|----------|----------|
| 300   | 4.31E-03 | 5.52E-04 | 2.77E-05 | 2.90E-05 | 6.03E-03 |
| 400   | 2.34E+00 | 6.37E-01 | 4.56E-02 | 7.35E-02 | 3.99E+00 |
| 500   | 1.10E+02 | 4.72E+01 | 4.23E+00 | 8.76E+00 | 2.19E+02 |
| 600   | 1.49E+03 | 8.69E+02 | 9.07E+01 | 2.22E+02 | 3.36E+03 |
| 700   | 9.79E+03 | 7.15E+03 | 8.35E+02 | 2.30E+03 | 2.45E+04 |
| 800   | 4.10E+04 | 3.55E+04 | 4.50E+03 | 1.36E+04 | 1.12E+05 |
| 900   | 1.27E+05 | 1.25E+05 | 1.70E+04 | 5.49E+04 | 3.72E+05 |
| 1000  | 3.15E+05 | 3.47E+05 | 4.96E+04 | 1.70E+05 | 9.86E+05 |
| 1100  | 6.72E+05 | 8.07E+05 | 1.20E+05 | 4.33E+05 | 2.22E+06 |

|      |          |          |          |          |          |
|------|----------|----------|----------|----------|----------|
| 1200 | 1.27E+06 | 1.64E+06 | 2.54E+05 | 9.50E+05 | 4.40E+06 |
| 1300 | 2.20E+06 | 3.02E+06 | 4.82E+05 | 1.86E+06 | 7.93E+06 |
| 1400 | 3.52E+06 | 5.12E+06 | 8.37E+05 | 3.33E+06 | 1.32E+07 |
| 1500 | 5.33E+06 | 8.11E+06 | 1.36E+06 | 5.53E+06 | 2.07E+07 |

**Table S33.** Rate constants of R3 using MS-TST/ZCT.

| T (K) | chair-eq1-<br>ax2 | chair-ax1-eq2 | chair-ax1-<br>ax2 | chair-eq1-<br>eq2 | boat-eq1 | boat-ax1 | total      |
|-------|-------------------|---------------|-------------------|-------------------|----------|----------|------------|
| 300   | 9.03E-04          | 2.48E-05      | 4.89E-05          | 3.81E-04          | 2.48E-06 | 1.03E-05 | 1.2869E-03 |
| 400   | 1.73E+00          | 1.41E-01      | 2.04E-01          | 1.18E+00          | 1.95E-02 | 6.43E-02 | 3.2886E+00 |
| 500   | 1.87E+02          | 2.93E+01      | 3.44E+01          | 1.70E+02          | 5.16E+00 | 1.53E+01 | 4.5392E+02 |
| 600   | 4.60E+03          | 1.09E+03      | 1.12E+03          | 5.03E+03          | 2.32E+02 | 6.45E+02 | 1.3595E+04 |
| 700   | 4.73E+04          | 1.50E+04      | 1.39E+04          | 5.86E+04          | 3.68E+03 | 9.74E+03 | 1.6439E+05 |
| 800   | 2.79E+05          | 1.09E+05      | 9.40E+04          | 3.78E+05          | 2.99E+04 | 7.62E+04 | 1.1068E+06 |
| 900   | 1.13E+06          | 5.17E+05      | 4.20E+05          | 1.63E+06          | 1.55E+05 | 3.82E+05 | 4.9890E+06 |
| 1000  | 3.48E+06          | 1.80E+06      | 1.40E+06          | 5.28E+06          | 5.79E+05 | 1.39E+06 | 1.6870E+07 |
| 1100  | 8.82E+06          | 5.02E+06      | 3.78E+06          | 1.39E+07          | 1.71E+06 | 4.03E+06 | 4.6092E+07 |
| 1200  | 1.92E+07          | 1.18E+07      | 8.64E+06          | 3.11E+07          | 4.23E+06 | 9.76E+06 | 1.0702E+08 |
| 1300  | 3.72E+07          | 2.43E+07      | 1.74E+07          | 6.17E+07          | 9.10E+06 | 2.06E+07 | 2.1887E+08 |
| 1400  | 6.56E+07          | 4.50E+07      | 3.18E+07          | 1.11E+08          | 1.75E+07 | 3.91E+07 | 4.0461E+08 |
| 1500  | 1.07E+08          | 7.69E+07      | 5.35E+07          | 1.85E+08          | 3.09E+07 | 6.81E+07 | 6.8922E+08 |

**Table S34.** Rate constants of R4 using MS-TST/ZCT.

| T (K) | chair-eq | twist-chair | chair-ax | total    |
|-------|----------|-------------|----------|----------|
| 300   | 1.10E-08 | 5.97E-08    | 2.74E-08 | 2.09E+04 |
| 400   | 3.55E-04 | 1.14E-03    | 5.22E-04 | 3.44E+05 |
| 500   | 2.07E-01 | 4.80E-01    | 2.26E-01 | 2.08E+06 |
| 600   | 1.54E+01 | 2.87E+01    | 1.40E+01 | 7.41E+06 |
| 700   | 3.46E+02 | 5.52E+02    | 2.81E+02 | 1.94E+07 |
| 800   | 3.65E+03 | 5.18E+03    | 2.74E+03 | 4.16E+07 |
| 900   | 2.31E+04 | 3.00E+04    | 1.64E+04 | 7.83E+07 |
| 1000  | 1.02E+05 | 1.23E+05    | 6.97E+04 | 1.34E+08 |
| 1100  | 3.47E+05 | 3.95E+05    | 2.30E+05 | 2.14E+08 |
| 1200  | 9.64E+05 | 1.05E+06    | 6.26E+05 | 3.23E+08 |
| 1300  | 2.30E+06 | 2.40E+06    | 1.47E+06 | 4.67E+08 |
| 1400  | 4.84E+06 | 4.88E+06    | 3.05E+06 | 6.52E+08 |
| 1500  | 9.23E+06 | 9.04E+06    | 5.77E+06 | 8.84E+08 |

**(8) The pressure dependent rate constants of R1-R4.**

**Table S35.** Pressure dependent rate constants of R1.

| T(K) | Pa(bar)  |          |          |          |
|------|----------|----------|----------|----------|
|      | 0.1      | 1        | 10       | 100      |
| 300  | 9.83E-04 | 1.02E-03 | 1.03E-03 | 1.03E-03 |
| 400  | 1.70E+00 | 2.02E+00 | 2.06E+00 | 2.06E+00 |
| 500  | 1.52E+02 | 2.21E+02 | 2.32E+02 | 2.33E+02 |

|      |          |          |          |          |
|------|----------|----------|----------|----------|
| 600  | 2.82E+03 | 5.33E+03 | 5.92E+03 | 5.98E+03 |
| 700  | 2.03E+04 | 5.19E+04 | 6.31E+04 | 6.46E+04 |
| 800  | 7.82E+04 | 2.73E+05 | 3.82E+05 | 3.99E+05 |
| 900  | 2.13E+05 | 9.55E+05 | 1.57E+06 | 1.69E+06 |
| 1000 | 4.51E+05 | 2.47E+06 | 4.89E+06 | 5.48E+06 |
| 1100 | 8.07E+05 | 5.15E+06 | 1.23E+07 | 1.45E+07 |
| 1200 | 1.28E+06 | 9.16E+06 | 2.62E+07 | 3.31E+07 |
| 1300 | 1.87E+06 | 1.45E+07 | 4.89E+07 | 6.66E+07 |
| 1400 | 2.55E+06 | 2.09E+07 | 8.22E+07 | 1.22E+08 |
| 1500 | 3.30E+06 | 2.84E+07 | 1.27E+08 | 2.06E+08 |

**Table S36.** Pressure dependent rate constants of R2.

| T(K) | Pa(bar)  |          |          |          |
|------|----------|----------|----------|----------|
|      | 0.1      | 1        | 10       | 100      |
| 300  | 6.00E-03 | 6.04E-03 | 6.04E-03 | 6.04E-03 |
| 400  | 3.89E+00 | 3.96E+00 | 3.97E+00 | 3.97E+00 |
| 500  | 2.10E+02 | 2.19E+02 | 2.20E+02 | 2.20E+02 |
| 600  | 3.07E+03 | 3.33E+03 | 3.36E+03 | 3.37E+03 |
| 700  | 2.08E+04 | 2.40E+04 | 2.44E+04 | 2.45E+04 |
| 800  | 8.52E+04 | 1.09E+05 | 1.12E+05 | 1.12E+05 |
| 900  | 2.48E+05 | 3.53E+05 | 3.69E+05 | 3.71E+05 |
| 1000 | 5.66E+05 | 9.15E+05 | 9.80E+05 | 9.87E+05 |
| 1100 | 1.08E+06 | 1.99E+06 | 2.19E+06 | 2.21E+06 |
| 1200 | 1.79E+06 | 3.81E+06 | 4.34E+06 | 4.40E+06 |
| 1300 | 2.69E+06 | 6.56E+06 | 7.76E+06 | 7.91E+06 |
| 1400 | 3.74E+06 | 1.04E+07 | 1.28E+07 | 1.32E+07 |
| 1500 | 4.90E+06 | 1.54E+07 | 2.00E+07 | 2.07E+07 |

**Table S37.** Pressure dependent rate constants of R3.

| T(K) | Pa(bar)  |          |          |          |
|------|----------|----------|----------|----------|
|      | 0.1      | 1        | 10       | 100      |
| 300  | 5.08E-04 | 1.11E-03 | 1.27E-03 | 1.29E-03 |
| 400  | 1.17E+00 | 2.73E+00 | 3.21E+00 | 3.27E+00 |
| 500  | 1.23E+02 | 3.44E+02 | 4.37E+02 | 4.50E+02 |
| 600  | 2.39E+03 | 8.77E+03 | 1.28E+04 | 1.35E+04 |
| 700  | 1.72E+04 | 8.30E+04 | 1.48E+05 | 1.62E+05 |
| 800  | 6.59E+04 | 4.02E+05 | 9.22E+05 | 1.08E+06 |
| 900  | 1.80E+05 | 1.28E+06 | 3.74E+06 | 4.80E+06 |
| 1000 | 3.85E+05 | 3.06E+06 | 1.12E+07 | 1.61E+07 |
| 1100 | 6.97E+05 | 5.94E+06 | 2.63E+07 | 4.26E+07 |
| 1200 | 1.12E+06 | 1.00E+07 | 5.19E+07 | 9.61E+07 |
| 1300 | 1.65E+06 | 1.52E+07 | 8.94E+07 | 1.89E+08 |
| 1400 | 2.27E+06 | 2.14E+07 | 1.39E+08 | 3.34E+08 |
| 1500 | 2.98E+06 | 2.84E+07 | 1.99E+08 | 5.44E+08 |

**Table S38.** Pressure dependent rate constants of R3.

| T(K) | Pa(bar)  |          |          |          |
|------|----------|----------|----------|----------|
|      | 0.1      | 1        | 10       | 100      |
| 300  | 9.37E-09 | 3.70E-08 | 5.28E-08 | 5.52E-08 |
| 400  | 2.35E-04 | 8.80E-04 | 1.24E-03 | 1.29E-03 |
| 500  | 1.11E-01 | 4.26E-01 | 6.14E-01 | 6.44E-01 |
| 600  | 6.11E+00 | 2.66E+01 | 4.17E+01 | 4.44E+01 |
| 700  | 9.68E+01 | 4.94E+02 | 8.87E+02 | 9.69E+02 |
| 800  | 6.87E+02 | 4.15E+03 | 8.92E+03 | 1.02E+04 |
| 900  | 3.09E+03 | 2.11E+04 | 5.43E+04 | 6.55E+04 |
| 1000 | 9.89E+03 | 7.44E+04 | 2.29E+05 | 2.95E+05 |
| 1100 | 2.50E+04 | 2.02E+05 | 7.32E+05 | 1.02E+06 |
| 1200 | 5.31E+04 | 4.51E+05 | 1.90E+06 | 2.90E+06 |
| 1300 | 9.93E+04 | 8.75E+05 | 4.19E+06 | 7.02E+06 |
| 1400 | 1.68E+05 | 1.52E+06 | 8.14E+06 | 1.51E+07 |
| 1500 | 2.63E+05 | 2.43E+06 | 1.43E+07 | 2.92E+07 |

**(9) Cartesian coordinates of the reactant, products and transition states at M06-2X/6-311++g(d,p)**

**Table S39.** Cartesian coordinates of the reactants.

| Reactant 1                     |          |          |          | Reactant 2                    |          |          |          |
|--------------------------------|----------|----------|----------|-------------------------------|----------|----------|----------|
| C                              | -2.72354 | 1.099441 | 0.106007 | C                             | 2.849802 | 0.116529 | 2.664567 |
| H                              | -3.3931  | 0.937751 | -0.74022 | H                             | 2.10429  | 0.27965  | 3.443743 |
| H                              | -1.96712 | 1.832784 | -0.17782 | H                             | 2.972901 | 1.041393 | 2.099858 |
| H                              | -3.30351 | 1.497539 | 0.940603 | H                             | 3.799876 | -0.13403 | 3.139118 |
| C                              | -2.05345 | -0.19528 | 0.505325 | C                             | 2.414966 | -1.00685 | 1.751012 |
| H                              | -1.35409 | -0.0293  | 1.329176 | H                             | 3.150031 | -1.17702 | 0.955086 |
| H                              | -2.78622 | -0.95249 | 0.812107 | H                             | 2.280489 | -1.94027 | 2.303899 |
| O                              | -1.34122 | -0.68507 | -0.63232 | O                             | 1.17122  | -0.62565 | 1.157002 |
| C                              | -0.44667 | -1.69484 | -0.34529 | C                             | 0.705298 | -1.49247 | 0.211509 |
| H                              | -0.11534 | -2.09955 | -1.30562 | H                             | 1.45464  | -1.82349 | -0.51329 |
| H                              | -0.88499 | -2.47954 | 0.279223 | O                             | -0.35682 | -0.99262 | -0.45694 |
| O                              | 0.681969 | -1.2433  | 0.392775 | C                             | -1.40948 | -0.4461  | 0.356301 |
| C                              | 1.373684 | -0.20724 | -0.19171 | H                             | -1.68356 | -1.17448 | 1.124129 |
| H                              | 1.269488 | -0.19459 | -1.28178 | C                             | -2.57062 | -0.15319 | -0.56633 |
| C                              | 2.804234 | -0.19628 | 0.278624 | H                             | -2.91515 | -1.06881 | -1.04829 |
| H                              | 3.31349  | -1.08588 | -0.09233 | H                             | -3.39751 | 0.277674 | 0.000873 |
| H                              | 3.307681 | 0.694353 | -0.09678 | H                             | -2.27174 | 0.555866 | -1.3396  |
| H                              | 2.82448  | -0.20009 | 1.369104 | H                             | -1.04375 | 0.458078 | 0.846173 |
| O                              | 0.718449 | 1.03008  | 0.266209 | O                             | 0.312542 | -2.71192 | 0.957304 |
| O                              | 1.111262 | 2.053805 | -0.42085 | O                             | 0.23429  | -3.73497 | 0.163164 |
| E <sub>0K</sub> = -496.6697664 |          |          |          | E <sub>0K</sub> =-496.6708106 |          |          |          |

**Table S40.** Cartesian coordinates of the products.

| Product 1 (P1)          |          |          |          | Product 2 (P2)          |          |          |          |
|-------------------------|----------|----------|----------|-------------------------|----------|----------|----------|
| C                       | 2.743558 | 1.130921 | -0.0471  | C                       | -2.17665 | -0.59187 | 1.087072 |
| H                       | 2.19508  | 1.477351 | 0.830534 | H                       | -2.80209 | 0.106987 | 1.651256 |
| H                       | 2.331537 | 1.628291 | -0.9269  | H                       | -1.24988 | -0.76607 | 1.636705 |
| H                       | 3.790125 | 1.423727 | 0.061442 | H                       | -2.69737 | -1.54706 | 1.010261 |
| C                       | 2.64438  | -0.37616 | -0.20161 | C                       | -1.92403 | -0.05518 | -0.30212 |
| H                       | 3.204709 | -0.72236 | -1.06963 | H                       | -1.05272 | -0.87819 | -0.79025 |
| H                       | 3.036467 | -0.88965 | 0.684438 | H                       | -2.77442 | -0.12452 | -0.97989 |
| O                       | 1.300303 | -0.81109 | -0.43358 | O                       | -1.41715 | 1.227518 | -0.39558 |
| C                       | 0.458651 | -0.68346 | 0.635685 | C                       | -0.14291 | 1.462407 | 0.150252 |
| H                       | 0.922564 | -0.85889 | 1.609467 | H                       | -0.05805 | 1.023519 | 1.14922  |
| H                       | -0.49904 | -1.57474 | 0.374251 | H                       | -0.04868 | 2.54544  | 0.19386  |
| O                       | -0.28028 | 0.479127 | 0.671638 | O                       | 0.853933 | 0.975715 | -0.70541 |
| C                       | -1.33569 | 0.492847 | -0.28987 | C                       | 1.58356  | -0.16115 | -0.30453 |
| H                       | -0.91819 | 0.308042 | -1.28372 | H                       | 2.088766 | -0.48866 | -1.21441 |
| C                       | -2.08882 | 1.786515 | -0.15915 | C                       | 2.550776 | 0.110176 | 0.829028 |
| H                       | -1.41593 | 2.619499 | -0.36065 | H                       | 3.14335  | -0.78117 | 1.034615 |
| H                       | -2.9125  | 1.806249 | -0.87199 | H                       | 3.212834 | 0.926893 | 0.542291 |
| H                       | -2.48057 | 1.877534 | 0.854056 | H                       | 2.01715  | 0.387243 | 1.740181 |
| O                       | -2.19916 | -0.56239 | 0.046581 | O                       | 0.736209 | -1.19608 | 0.149681 |
| O                       | -1.54421 | -1.75553 | -0.22577 | O                       | -0.06341 | -1.63099 | -0.8902  |
| $E_{0K} = -496.6511837$ |          |          |          | $E_{0K} = -496.6539987$ |          |          |          |

| Product 3 (P3) |          |          |          | Product 4 (P4) |          |          |          |
|----------------|----------|----------|----------|----------------|----------|----------|----------|
| C              | 2.788949 | 0.383976 | 2.564944 | C              | -2.23637 | -1.77815 | -0.34242 |
| H              | 2.042045 | 0.603801 | 3.328823 | H              | -1.81813 | -2.56107 | -0.97701 |
| H              | 2.896801 | 1.258145 | 1.921727 | H              | -2.59629 | -0.96732 | -0.97834 |
| H              | 3.743303 | 0.189767 | 3.057315 | H              | -3.08014 | -2.19254 | 0.211978 |
| C              | 2.369123 | -0.82129 | 1.753992 | C              | -1.18811 | -1.25248 | 0.612268 |
| H              | 3.105988 | -1.04829 | 0.973608 | H              | -1.59636 | -0.4438  | 1.22704  |
| H              | 2.250726 | -1.70605 | 2.38395  | H              | -0.81721 | -2.042   | 1.276579 |
| O              | 1.119777 | -0.50893 | 1.132844 | O              | -0.10259 | -0.75096 | -0.16524 |
| C              | 0.682588 | -1.45508 | 0.24212  | C              | 0.797229 | 0.022085 | 0.564016 |
| H              | 1.440214 | -1.7515  | -0.49009 | H              | 1.037793 | -0.44359 | 1.525612 |
| O              | -0.39274 | -0.96298 | -0.47992 | O              | 0.351867 | 1.294844 | 0.814056 |
| C              | -1.54725 | -0.73307 | 0.231451 | C              | -0.16496 | 1.997656 | -0.32957 |
| C              | -2.58465 | -0.01132 | -0.54403 | H              | 0.174683 | 3.031007 | -0.19535 |
| H              | -2.75333 | -0.49739 | -1.50802 | C              | -1.64775 | 1.92212  | -0.38887 |
| H              | -3.52431 | 0.008141 | 0.00863  | H              | -2.21994 | 2.050488 | 0.520673 |
| H              | -2.28635 | 1.025985 | -0.74726 | H              | -2.15762 | 1.99554  | -1.33958 |
| H              | -1.42755 | -0.60439 | 1.300718 | H              | 1.878562 | -1.56398 | -1.02202 |
| O              | 0.311865 | -2.57591 | 1.022814 | H              | 0.290016 | 1.615687 | -1.2451  |
| O              | -0.0731  | -3.60724 | 0.135825 | O              | 1.954668 | 0.131739 | -0.22824 |
| H              | -1.01269 | -3.41174 | -0.00125 | O              | 2.489106 | -1.16885 | -0.38271 |

---

 $E_{0K} = -496.6516066$ 

---

---

 $E_{0K} = -496.6405745$ 

---

**Table S41.** Cartesian coordinates of the transition state 1 (TS1) within chair-eq structures.

---

| Structure 1             |          |          |          | Structure 2             |          |          |          |
|-------------------------|----------|----------|----------|-------------------------|----------|----------|----------|
| C                       | 3.813945 | -0.32235 | -0.49431 | C                       | 3.415895 | -0.34562 | -0.63248 |
| H                       | 3.641879 | -0.19283 | -1.56317 | H                       | 3.832387 | -1.09476 | 0.042306 |
| H                       | 3.92804  | -1.38678 | -0.28639 | H                       | 3.856804 | 0.622647 | -0.3927  |
| H                       | 4.738699 | 0.189539 | -0.2233  | H                       | 3.687732 | -0.60979 | -1.65584 |
| C                       | 2.656147 | 0.246009 | 0.294714 | C                       | 1.911455 | -0.29343 | -0.49703 |
| H                       | 2.811867 | 0.119066 | 1.373092 | H                       | 1.469702 | 0.470021 | -1.14709 |
| H                       | 2.52435  | 1.314586 | 0.089375 | H                       | 1.450318 | -1.25425 | -0.73405 |
| O                       | 1.477353 | -0.45274 | -0.09537 | O                       | 1.612575 | 0.044228 | 0.865855 |
| C                       | 0.362541 | -0.04644 | 0.561126 | C                       | 0.317446 | 0.337093 | 1.110715 |
| H                       | -0.05541 | 1.137853 | 0.213798 | H                       | -0.10073 | 1.362868 | 0.417619 |
| H                       | 0.496931 | 0.054353 | 1.65275  | H                       | 0.184511 | 0.620046 | 2.15896  |
| O                       | -0.68885 | -0.8522  | 0.211903 | O                       | -0.55082 | -0.65923 | 0.689566 |
| C                       | -1.95239 | -0.20295 | 0.266881 | C                       | -1.79278 | -0.19066 | 0.183363 |
| H                       | -2.1376  | 0.150925 | 1.288129 | H                       | -2.33092 | 0.350898 | 0.969489 |
| C                       | -2.99425 | -1.1577  | -0.24655 | C                       | -2.55    | -1.36445 | -0.37363 |
| H                       | -3.00214 | -2.05398 | 0.372685 | H                       | -2.71422 | -2.0981  | 0.414829 |
| H                       | -3.97474 | -0.68412 | -0.21365 | H                       | -3.51012 | -1.0305  | -0.76531 |
| H                       | -2.75436 | -1.43322 | -1.27347 | H                       | -1.96864 | -1.82243 | -1.17424 |
| O                       | -1.90223 | 0.908596 | -0.58619 | O                       | -1.51911 | 0.702838 | -0.86367 |
| O                       | -1.07796 | 1.856988 | 0.004526 | O                       | -1.00126 | 1.865376 | -0.30171 |
| $E_{0K} = -496.6277879$ |          |          |          | $E_{0K} = -496.6324252$ |          |          |          |

---

---

| Structure 3 |          |          |          | Structure 4 |          |          |          |
|-------------|----------|----------|----------|-------------|----------|----------|----------|
| C           | -3.76999 | 0.232338 | -0.44848 | C           | 3.536973 | -0.54322 | 0.487573 |
| H           | -4.1708  | -0.75513 | -0.2166  | H           | 3.684553 | -1.49953 | -0.01554 |
| H           | -3.60255 | 0.295823 | -1.52416 | H           | 3.051048 | -0.72922 | 1.447291 |
| H           | -4.5061  | 0.986036 | -0.16332 | H           | 4.513986 | -0.09774 | 0.68503  |
| C           | -2.47482 | 0.464087 | 0.294667 | C           | 2.711485 | 0.384076 | -0.38775 |
| H           | -2.04887 | 1.444452 | 0.064033 | H           | 2.551843 | 1.355685 | 0.092864 |
| H           | -2.61706 | 0.390835 | 1.38005  | H           | 3.208038 | 0.560814 | -1.34108 |
| O           | -1.54732 | -0.55079 | -0.11742 | O           | 1.450734 | -0.19559 | -0.72412 |
| C           | -0.3554  | -0.5061  | 0.51727  | C           | 0.480197 | 0.007237 | 0.202206 |
| H           | 0.447464 | -1.49668 | 0.137439 | H           | -0.0586  | 1.186828 | 0.148006 |
| H           | -0.40795 | -0.64523 | 1.609703 | H           | 0.827994 | -0.05111 | 1.247602 |
| O           | 0.391549 | 0.602279 | 0.164172 | O           | -0.57896 | -0.82148 | -0.06331 |
| C           | 1.79074  | 0.399165 | 0.283093 | C           | -1.8346  | -0.30048 | 0.351737 |
| H           | 2.034545 | 0.108548 | 1.312144 | H           | -1.81969 | -0.12963 | 1.434967 |
| C           | 2.500471 | 1.638528 | -0.18649 | C           | -2.90964 | -1.2493  | -0.10097 |
| H           | 2.203967 | 2.484415 | 0.432882 | H           | -2.73998 | -2.22951 | 0.343183 |

---



|   |          |          |          |   |          |          |          |
|---|----------|----------|----------|---|----------|----------|----------|
| H | 3.5779   | 1.495537 | -0.11255 | H | -3.88463 | -0.87395 | 0.207671 |
| H | 2.228624 | 1.838296 | -1.22295 | H | -2.87757 | -1.33716 | -1.18691 |
| O | 2.130382 | -0.66122 | -0.57313 | O | -2.02372 | 0.931726 | -0.28959 |
| O | 1.614731 | -1.82965 | -0.03075 | O | -1.14349 | 1.842169 | 0.279532 |

$E_{0K} = -496.6256907$

$E_{0K} = -496.6256508$

| Structure 5 |          |          |          | Structure 6 |          |          |          |
|-------------|----------|----------|----------|-------------|----------|----------|----------|
| C           | -2.05347 | 0.797328 | 1.113073 | C           | 3.094762 | 0.785307 | -0.13813 |
| H           | -2.58514 | 1.512531 | 0.482383 | H           | 2.53322  | 1.417046 | 0.553264 |
| H           | -1.01075 | 1.107915 | 1.196487 | H           | 2.878462 | 1.113188 | -1.15617 |
| H           | -2.49609 | 0.821902 | 2.110949 | H           | 4.158042 | 0.934255 | 0.058747 |
| C           | -2.17824 | -0.60662 | 0.548851 | C           | 2.742868 | -0.68424 | 0.024295 |
| H           | -1.5825  | -1.31851 | 1.123298 | H           | 3.366904 | -1.3067  | -0.61524 |
| H           | -3.21518 | -0.93933 | 0.543771 | H           | 2.880515 | -1.01242 | 1.061975 |
| O           | -1.78909 | -0.68161 | -0.83172 | O           | 1.40797  | -0.97248 | -0.38422 |
| C           | -0.51477 | -0.3453  | -1.12465 | C           | 0.452279 | -0.42802 | 0.409525 |
| H           | -0.22851 | 0.914615 | -0.98232 | H           | 0.271522 | 0.839982 | 0.230249 |
| H           | -0.31932 | -0.52626 | -2.18684 | H           | 0.679945 | -0.49547 | 1.488957 |
| O           | 0.410615 | -0.94045 | -0.28076 | O           | -0.76837 | -0.9532  | 0.072729 |
| C           | 1.627081 | -0.22004 | -0.15862 | C           | -1.85778 | -0.07079 | 0.308547 |
| H           | 2.090854 | -0.11245 | -1.14609 | H           | -1.89707 | 0.185238 | 1.374137 |
| C           | 2.496169 | -0.92017 | 0.849261 | C           | -3.11032 | -0.72226 | -0.20868 |
| H           | 2.697455 | -1.93651 | 0.512537 | H           | -3.26804 | -1.66794 | 0.308656 |
| H           | 3.43644  | -0.38142 | 0.960639 | H           | -3.96332 | -0.06679 | -0.03693 |
| H           | 1.980568 | -0.95528 | 1.809299 | H           | -3.00228 | -0.91131 | -1.27667 |
| O           | 1.320383 | 1.06118  | 0.328405 | O           | -1.62826 | 1.103809 | -0.42227 |
| O           | 0.679535 | 1.758578 | -0.68989 | O           | -0.58243 | 1.78324  | 0.188221 |

$E_{0K} = -496.6318822$

$E_{0K} = -496.626901$

| Structure 7 |          |          |          | Structure 8 |          |          |          |
|-------------|----------|----------|----------|-------------|----------|----------|----------|
| C           | -2.51065 | 1.263925 | -0.45678 | C           | -3.02974 | 0.740368 | 0.507932 |
| H           | -1.69381 | 1.877532 | -0.07736 | H           | -2.27055 | 1.230786 | 1.120847 |
| H           | -3.34981 | 1.325921 | 0.237893 | H           | -3.55556 | 0.002313 | 1.116393 |
| H           | -2.8319  | 1.657417 | -1.42377 | H           | -3.74586 | 1.500705 | 0.190202 |
| C           | -2.0638  | -0.17651 | -0.61164 | C           | -2.4069  | 0.083142 | -0.7107  |
| H           | -2.87091 | -0.79923 | -0.99924 | H           | -3.16493 | -0.38036 | -1.34019 |
| H           | -1.20399 | -0.2599  | -1.28223 | H           | -1.84758 | 0.805677 | -1.30754 |
| O           | -1.72267 | -0.74794 | 0.664034 | O           | -1.53926 | -1.00382 | -0.35146 |
| C           | -0.40306 | -0.82553 | 0.935074 | C           | -0.45971 | -0.70203 | 0.410155 |
| H           | 0.241808 | -1.57977 | 0.093158 | H           | 0.505786 | -1.56936 | 0.219764 |
| H           | -0.24467 | -1.28824 | 1.913672 | H           | -0.62784 | -0.77889 | 1.496482 |
| O           | 0.252327 | 0.389242 | 0.781232 | O           | 0.145444 | 0.486038 | 0.051286 |
| C           | 1.587144 | 0.287935 | 0.3056   | C           | 1.541405 | 0.512433 | 0.321602 |
| H           | 2.19086  | -0.28585 | 1.017669 | H           | 1.70806  | 0.33453  | 1.390739 |

|   |          |          |          |   |          |          |          |
|---|----------|----------|----------|---|----------|----------|----------|
| C | 2.103542 | 1.677077 | 0.049797 | C | 2.101527 | 1.816039 | -0.17598 |
| H | 2.077169 | 2.251224 | 0.975306 | H | 1.610577 | 2.642988 | 0.336057 |
| H | 3.127798 | 1.627239 | -0.3179  | H | 3.172513 | 1.853885 | 0.019634 |
| H | 1.472786 | 2.165435 | -0.6937  | H | 1.923987 | 1.899409 | -1.24826 |
| O | 1.555064 | -0.4084  | -0.91259 | O | 2.126976 | -0.53406 | -0.40363 |
| O | 1.265976 | -1.73956 | -0.62966 | O | 1.743328 | -1.72834 | 0.189779 |

$E_{0K} = -496.6312062$

$E_{0K} = -496.6237745$

**Table S42.** Cartesian coordinates of the transition state 1 (TS1) within boat-eq structures.

| Structure 9 |          |          |          | Structure 10 |          |          |          |
|-------------|----------|----------|----------|--------------|----------|----------|----------|
| C           | -3.84588 | -0.31422 | 0.365927 | C            | 3.361123 | 0.478068 | 0.325631 |
| H           | -3.71337 | -0.62153 | 1.403697 | H            | 3.820992 | 0.370359 | -0.65751 |
| H           | -4.01731 | -1.20367 | -0.24129 | H            | 3.72937  | -0.31994 | 0.971301 |
| H           | -4.72415 | 0.329993 | 0.300582 | H            | 3.662728 | 1.437796 | 0.748518 |
| C           | -2.62191 | 0.427082 | -0.1221  | C            | 1.854984 | 0.414043 | 0.209934 |
| H           | -2.73801 | 0.7385   | -1.16706 | H            | 1.37368  | 0.504131 | 1.191352 |
| H           | -2.4316  | 1.32044  | 0.483585 | H            | 1.46785  | 1.202663 | -0.44028 |
| O           | -1.50705 | -0.45497 | -0.01699 | O            | 1.517569 | -0.85886 | -0.34485 |
| C           | -0.34356 | 0.089936 | -0.44497 | C            | 0.192988 | -1.12099 | -0.4686  |
| H           | 0.136502 | 0.99877  | 0.334174 | H            | -0.39383 | -1.15167 | 0.687744 |
| H           | -0.41939 | 0.631474 | -1.40452 | H            | 0.062222 | -2.11767 | -0.89471 |
| O           | 0.632339 | -0.8693  | -0.4137  | O            | -0.5168  | -0.14723 | -1.15528 |
| C           | 1.97652  | -0.38631 | -0.45411 | C            | -1.70223 | 0.395957 | -0.55874 |
| H           | 2.399055 | -0.61696 | -1.43546 | H            | -2.43954 | 0.457767 | -1.35997 |
| C           | 2.744605 | -1.02492 | 0.676837 | C            | -1.42566 | 1.747977 | 0.06027  |
| H           | 2.657839 | -2.10927 | 0.606941 | H            | -0.98928 | 2.40496  | -0.69283 |
| H           | 3.794844 | -0.73895 | 0.61114  | H            | -2.36305 | 2.180235 | 0.413045 |
| H           | 2.332042 | -0.69136 | 1.628138 | H            | -0.74165 | 1.653413 | 0.901908 |
| O           | 1.992612 | 1.02305  | -0.42197 | O            | -2.25461 | -0.532   | 0.335483 |
| O           | 1.290218 | 1.452866 | 0.696472 | O            | -1.35575 | -0.72597 | 1.379696 |

$E_{0K} = -496.6201575$

$E_{0K} = -496.6232241$

| Structure 11 |          |          |          | Structure 12 |          |          |          |
|--------------|----------|----------|----------|--------------|----------|----------|----------|
| C            | 3.801852 | 0.22398  | 0.340397 | C            | 3.518591 | -0.16138 | 0.616667 |
| H            | 4.149377 | -0.80945 | 0.367248 | H            | 3.745222 | -1.22614 | 0.550777 |
| H            | 3.690279 | 0.580217 | 1.365082 | H            | 3.007949 | 0.025861 | 1.563152 |
| H            | 4.554102 | 0.834391 | -0.16235 | H            | 4.45728  | 0.396132 | 0.62322  |
| C            | 2.483073 | 0.319283 | -0.39114 | C            | 2.670592 | 0.265696 | -0.5687  |
| H            | 2.110258 | 1.346448 | -0.41831 | H            | 2.43179  | 1.334175 | -0.52866 |
| H            | 2.568774 | -0.04947 | -1.42071 | H            | 3.189818 | 0.072845 | -1.50677 |
| O            | 1.534653 | -0.49783 | 0.311847 | O            | 1.461453 | -0.4909  | -0.647   |
| C            | 0.323206 | -0.58208 | -0.27878 | C            | 0.446893 | 0.011586 | 0.09768  |
| H            | -0.50511 | -1.33319 | 0.410144 | H            | -0.14377 | 1.018469 | -0.43672 |
| H            | 0.314219 | -1.07526 | -1.2644  | H            | 0.749489 | 0.420949 | 1.076668 |

|                       |          |          |          |                       |          |          |          |
|-----------------------|----------|----------|----------|-----------------------|----------|----------|----------|
| O                     | -0.34209 | 0.6283   | -0.26661 | O                     | -0.55479 | -0.91999 | 0.166091 |
| C                     | -1.75106 | 0.563074 | -0.48028 | C                     | -1.83985 | -0.42247 | 0.545466 |
| H                     | -1.97538 | 0.913479 | -1.4913  | H                     | -2.06381 | -0.77929 | 1.553995 |
| C                     | -2.43129 | 1.382941 | 0.588366 | C                     | -2.85052 | -0.8864  | -0.47458 |
| H                     | -2.03034 | 2.396667 | 0.580321 | H                     | -2.80336 | -1.97185 | -0.56318 |
| H                     | -3.50404 | 1.415257 | 0.39584  | H                     | -3.85086 | -0.59036 | -0.15702 |
| H                     | -2.24615 | 0.930103 | 1.561782 | H                     | -2.62374 | -0.4364  | -1.44019 |
| O                     | -2.17545 | -0.78345 | -0.50915 | O                     | -1.79758 | 0.977482 | 0.702478 |
| O                     | -1.72721 | -1.42106 | 0.639563 | O                     | -1.33037 | 1.545077 | -0.47588 |
| $E_{0K}=-496.6182122$ |          |          |          | $E_{0K}=-496.6182206$ |          |          |          |

| Structure 13          |          |          |          | Structure 14          |          |          |          |
|-----------------------|----------|----------|----------|-----------------------|----------|----------|----------|
| C                     | -2.08008 | 1.083534 | -0.88611 | C                     | -3.00497 | 0.894551 | 0.391568 |
| H                     | -2.48558 | 0.492792 | -1.70991 | H                     | -2.36238 | 1.628181 | -0.09953 |
| H                     | -1.01902 | 1.260417 | -1.07172 | H                     | -2.81953 | 0.935575 | 1.466242 |
| H                     | -2.58861 | 2.049428 | -0.87059 | H                     | -4.04259 | 1.178654 | 0.206712 |
| C                     | -2.30391 | 0.375163 | 0.438292 | C                     | -2.75674 | -0.51118 | -0.12936 |
| H                     | -1.85202 | 0.927534 | 1.264105 | H                     | -3.44803 | -1.22159 | 0.321627 |
| H                     | -3.36611 | 0.244927 | 0.639822 | H                     | -2.87889 | -0.55707 | -1.21821 |
| O                     | -1.78724 | -0.96334 | 0.432847 | O                     | -1.46218 | -0.99936 | 0.216284 |
| C                     | -0.45966 | -1.09898 | 0.228964 | C                     | -0.44268 | -0.36135 | -0.40841 |
| H                     | -0.05991 | -0.80264 | -0.96046 | H                     | -0.16904 | 0.791599 | 0.070421 |
| H                     | -0.16658 | -2.14876 | 0.332205 | H                     | -0.64021 | -0.13145 | -1.47118 |
| O                     | 0.2836   | -0.21469 | 0.993663 | O                     | 0.715655 | -1.05848 | -0.18686 |
| C                     | 1.642106 | -0.0228  | 0.601542 | C                     | 1.931768 | -0.32931 | -0.37421 |
| H                     | 2.288257 | -0.52322 | 1.327503 | H                     | 2.436235 | -0.72753 | -1.25796 |
| C                     | 1.909601 | 1.460166 | 0.511816 | C                     | 2.764019 | -0.45734 | 0.878321 |
| H                     | 1.640726 | 1.937097 | 1.454722 | H                     | 2.912744 | -1.51273 | 1.106848 |
| H                     | 2.967716 | 1.629091 | 0.309768 | H                     | 3.731613 | 0.021204 | 0.723337 |
| H                     | 1.313929 | 1.889301 | -0.29356 | H                     | 2.247173 | 0.021111 | 1.709075 |
| O                     | 1.908965 | -0.71512 | -0.59683 | O                     | 1.655487 | 1.003921 | -0.73559 |
| O                     | 0.979538 | -0.32417 | -1.5533  | O                     | 0.851612 | 1.574142 | 0.243067 |
| $E_{0K}=-496.6234147$ |          |          |          | $E_{0K}=-496.6193136$ |          |          |          |

| Structure 15 |          |          |          | Structure 16 |          |          |          |
|--------------|----------|----------|----------|--------------|----------|----------|----------|
| C            | 2.750306 | 1.054719 | 0.018858 | C            | -3.04577 | 0.500171 | 0.729847 |
| H            | 2.008268 | 1.611341 | -0.55265 | H            | -2.27463 | 0.850359 | 1.419238 |
| H            | 3.548521 | 0.736976 | -0.65372 | H            | -3.50149 | -0.40433 | 1.136666 |
| H            | 3.180168 | 1.710436 | 0.779473 | H            | -3.81239 | 1.274579 | 0.663193 |
| C            | 2.115002 | -0.15218 | 0.681741 | C            | -2.46614 | 0.234548 | -0.64768 |
| H            | 2.848105 | -0.70906 | 1.266517 | H            | -3.23794 | -0.08595 | -1.34582 |
| H            | 1.292166 | 0.140562 | 1.34042  | H            | -1.97484 | 1.122652 | -1.04881 |
| O            | 1.624655 | -1.08325 | -0.29556 | O            | -1.53073 | -0.8562  | -0.63572 |
| C            | 0.299469 | -1.03432 | -0.54672 | C            | -0.42781 | -0.7101  | 0.134578 |

|   |          |          |          |   |          |          |          |
|---|----------|----------|----------|---|----------|----------|----------|
| H | -0.42255 | -1.35387 | 0.47132  | H | 0.547529 | -1.45303 | -0.29372 |
| H | 0.029463 | -1.77062 | -1.30968 | H | -0.5296  | -1.06608 | 1.172352 |
| O | -0.13887 | 0.255359 | -0.81103 | O | 0.120084 | 0.552875 | 0.038975 |
| C | -1.51816 | 0.542096 | -0.57062 | C | 1.476636 | 0.669981 | 0.472585 |
| H | -1.99974 | 0.733621 | -1.53244 | H | 1.496745 | 1.182408 | 1.438019 |
| C | -1.60669 | 1.722343 | 0.367594 | C | 2.252651 | 1.401963 | -0.59475 |
| H | -1.04366 | 2.558989 | -0.04725 | H | 1.772827 | 2.358297 | -0.80401 |
| H | -2.64995 | 2.014741 | 0.491441 | H | 3.271858 | 1.576163 | -0.24859 |
| H | -1.18974 | 1.450072 | 1.33693  | H | 2.27132  | 0.800509 | -1.50285 |
| O | -2.18392 | -0.60391 | -0.09813 | O | 1.999965 | -0.60361 | 0.774285 |
| O | -1.53194 | -1.05809 | 1.042791 | O | 1.814823 | -1.43493 | -0.32169 |

$E_{0K}=-496.6225924$

$E_{0K}=-496.6164734$

**Table S43.** Cartesian coordinates of the transition state 1 (TS1) within chair-ax structures.

| Structure 17 |          |          |          | Structure 18 |          |          |          |
|--------------|----------|----------|----------|--------------|----------|----------|----------|
| C            | -3.47389 | -0.36917 | -0.75062 | C            | 3.458083 | 0.337821 | -0.7172  |
| H            | -3.69873 | -1.39153 | -0.44459 | H            | 3.047637 | 0.651343 | -1.67783 |
| H            | -3.08819 | -0.387   | -1.77059 | H            | 3.848999 | -0.67494 | -0.8214  |
| H            | -4.39719 | 0.212164 | -0.73685 | H            | 4.27969  | 1.005994 | -0.453   |
| C            | -2.45666 | 0.249395 | 0.181649 | C            | 2.388545 | 0.380832 | 0.350186 |
| H            | -2.21693 | 1.276639 | -0.1163  | H            | 2.784892 | 0.064631 | 1.322712 |
| H            | -2.82768 | 0.268033 | 1.214132 | H            | 1.969947 | 1.386519 | 0.459111 |
| O            | -1.2696  | -0.53621 | 0.122661 | O            | 1.343229 | -0.51936 | -0.03806 |
| C            | -0.29971 | -0.12064 | 0.998144 | C            | 0.310453 | -0.58465 | 0.854982 |
| H            | -0.58931 | -0.16051 | 2.053091 | H            | -0.46875 | -1.54954 | 0.340338 |
| H            | 0.003615 | 1.115408 | 0.64704  | H            | 0.601717 | -0.80433 | 1.885411 |
| O            | 0.883527 | -0.76074 | 0.787264 | O            | -0.55277 | 0.487474 | 0.83133  |
| C            | 1.570069 | -0.28174 | -0.37433 | C            | -1.41603 | 0.476206 | -0.3077  |
| H            | 0.904795 | -0.36486 | -1.23793 | H            | -0.8101  | 0.428053 | -1.21696 |
| C            | 2.862575 | -1.03624 | -0.50645 | C            | -2.33332 | 1.663697 | -0.22844 |
| H            | 2.650175 | -2.0982  | -0.62434 | H            | -1.74318 | 2.579534 | -0.23925 |
| H            | 3.410601 | -0.67708 | -1.37679 | H            | -3.01263 | 1.661215 | -1.08016 |
| H            | 3.463503 | -0.88678 | 0.390686 | H            | -2.90762 | 1.617056 | 0.696906 |
| O            | 1.862812 | 1.070496 | -0.14666 | O            | -2.18862 | -0.69159 | -0.21178 |
| O            | 0.66964  | 1.781955 | -0.17426 | O            | -1.35647 | -1.77765 | -0.44735 |

$E_{0K}=-496.6310722$

$E_{0K}=-496.6281164$

| Structure 19 |          |          |          | Structure 20 |          |          |          |
|--------------|----------|----------|----------|--------------|----------|----------|----------|
| C            | 3.413438 | 0.104352 | 0.333931 | C            | -2.84222 | 0.815755 | -0.3508  |
| H            | 3.109922 | -0.27716 | 1.310545 | H            | -2.42594 | 1.150462 | -1.30183 |
| H            | 3.644864 | 1.167069 | 0.427013 | H            | -2.40773 | 1.42354  | 0.444772 |
| H            | 4.323592 | -0.42318 | 0.042711 | H            | -3.91993 | 0.990846 | -0.35789 |
| C            | 2.341003 | -0.11304 | -0.7216  | C            | -2.56951 | -0.66688 | -0.15244 |
| H            | 2.703138 | 0.186923 | -1.70417 | H            | -2.91336 | -1.00466 | 0.833179 |

|                       |          |          |          |                       |          |          |          |
|-----------------------|----------|----------|----------|-----------------------|----------|----------|----------|
| H                     | 2.041522 | -1.16614 | -0.77295 | H                     | -3.08251 | -1.25888 | -0.90954 |
| O                     | 1.176616 | 0.683872 | -0.50816 | O                     | -1.19058 | -0.99639 | -0.30478 |
| C                     | 0.470949 | 0.380546 | 0.628793 | C                     | -0.39927 | -0.62243 | 0.750005 |
| H                     | 0.9618   | 0.638528 | 1.570314 | H                     | -0.7499  | -0.97882 | 1.724582 |
| H                     | 0.223717 | -0.91934 | 0.564832 | H                     | -0.3303  | 0.686009 | 0.74014  |
| O                     | -0.78982 | 0.896437 | 0.588985 | O                     | 0.906621 | -0.95661 | 0.544582 |
| C                     | -1.65141 | 0.177751 | -0.2986  | C                     | 1.572469 | -0.07118 | -0.36149 |
| H                     | -1.19273 | 0.145695 | -1.29037 | H                     | 1.012632 | -0.03817 | -1.30021 |
| C                     | -3.01211 | 0.813724 | -0.26022 | C                     | 2.999064 | -0.52138 | -0.501   |
| H                     | -2.93664 | 1.847432 | -0.59569 | H                     | 3.020527 | -1.5334  | -0.90361 |
| H                     | -3.69123 | 0.268679 | -0.91488 | H                     | 3.531848 | 0.148704 | -1.17477 |
| H                     | -3.39402 | 0.793553 | 0.760576 | H                     | 3.479364 | -0.5131  | 0.47757  |
| O                     | -1.75419 | -1.12813 | 0.204593 | O                     | 1.560365 | 1.202278 | 0.225506 |
| O                     | -0.52825 | -1.75743 | 0.028106 | O                     | 0.251356 | 1.666244 | 0.212425 |
| $E_{0K}=-496.6287097$ |          |          |          | $E_{0K}=-496.6297981$ |          |          |          |

| Structure 21          |          |          |          | Structure 22          |          |          |          |
|-----------------------|----------|----------|----------|-----------------------|----------|----------|----------|
| C                     | -3.15032 | 0.505312 | -0.4002  | C                     | -2.22283 | -1.38487 | -0.49689 |
| H                     | -3.67384 | -0.41337 | -0.67177 | H                     | -2.97585 | -1.63288 | 0.252487 |
| H                     | -2.62694 | 0.887983 | -1.27869 | H                     | -1.28925 | -1.87042 | -0.21207 |
| H                     | -3.891   | 1.250062 | -0.10294 | H                     | -2.54934 | -1.78314 | -1.46018 |
| C                     | -2.19268 | 0.251824 | 0.750146 | C                     | -2.06895 | 0.123756 | -0.59428 |
| H                     | -1.61594 | 1.152702 | 0.980585 | H                     | -1.31598 | 0.418404 | -1.33108 |
| H                     | -2.72835 | -0.05487 | 1.647573 | H                     | -3.01552 | 0.580715 | -0.88364 |
| O                     | -1.28917 | -0.83252 | 0.489693 | O                     | -1.7462  | 0.714642 | 0.669813 |
| C                     | -0.4797  | -0.68456 | -0.60391 | C                     | -0.43249 | 0.847519 | 0.992974 |
| H                     | -0.95241 | -0.8724  | -1.57019 | H                     | -0.35737 | 1.329207 | 1.966665 |
| H                     | 0.488484 | -1.57627 | -0.37637 | H                     | 0.17137  | 1.607124 | 0.11298  |
| O                     | 0.241733 | 0.485518 | -0.64927 | O                     | 0.34797  | -0.29768 | 0.955881 |
| C                     | 1.342366 | 0.492911 | 0.26556  | C                     | 1.187687 | -0.4806  | -0.18627 |
| H                     | 0.971473 | 0.288398 | 1.27479  | H                     | 0.572146 | -0.70411 | -1.06349 |
| C                     | 2.076659 | 1.795926 | 0.12138  | C                     | 2.17962  | -1.56369 | 0.136837 |
| H                     | 1.405027 | 2.619892 | 0.361166 | H                     | 1.645763 | -2.48311 | 0.376528 |
| H                     | 2.928895 | 1.815378 | 0.79974  | H                     | 2.83061  | -1.73482 | -0.72    |
| H                     | 2.42483  | 1.903806 | -0.90591 | H                     | 2.776462 | -1.26202 | 0.997519 |
| O                     | 2.194275 | -0.54853 | -0.12545 | O                     | 1.886883 | 0.708456 | -0.41992 |
| O                     | 1.564636 | -1.75069 | 0.165551 | O                     | 0.967435 | 1.659884 | -0.84953 |
| $E_{0K}=-496.6256185$ |          |          |          | $E_{0K}=-496.6264724$ |          |          |          |

| Structure 23 |          |          |          | Structure 24 |          |          |          |
|--------------|----------|----------|----------|--------------|----------|----------|----------|
| C            | 2.743558 | 1.130921 | -0.0471  | C            | 2.311044 | 0.710573 | 1.078133 |
| H            | 2.19508  | 1.477351 | 0.830534 | H            | 1.418689 | 1.337278 | 1.041527 |
| H            | 2.331537 | 1.628291 | -0.9269  | H            | 3.100184 | 1.197628 | 0.503149 |
| H            | 3.790125 | 1.423727 | 0.061442 | H            | 2.637807 | 0.634274 | 2.117578 |

|                       |          |          |          |                       |          |          |          |
|-----------------------|----------|----------|----------|-----------------------|----------|----------|----------|
| C                     | 2.64438  | -0.37616 | -0.20161 | C                     | 2.046576 | -0.68052 | 0.525913 |
| H                     | 3.204709 | -0.72236 | -1.06963 | H                     | 2.947021 | -1.29197 | 0.576903 |
| H                     | 3.036467 | -0.88965 | 0.684438 | H                     | 1.257074 | -1.19855 | 1.077369 |
| O                     | 1.300303 | -0.81109 | -0.43358 | O                     | 1.713701 | -0.6533  | -0.86307 |
| C                     | 0.458651 | -0.68346 | 0.635685 | C                     | 0.443095 | -0.31136 | -1.21333 |
| H                     | 0.922564 | -0.85889 | 1.609467 | H                     | 0.33121  | -0.45456 | -2.2879  |
| H                     | -0.49904 | -1.57474 | 0.374251 | H                     | 0.181492 | 0.946089 | -0.99109 |
| O                     | -0.28028 | 0.479127 | 0.671638 | O                     | -0.57177 | -0.94473 | -0.51568 |
| C                     | -1.33569 | 0.492847 | -0.28987 | C                     | -1.30003 | -0.14858 | 0.423925 |
| H                     | -0.91819 | 0.308042 | -1.28372 | H                     | -0.65246 | 0.088597 | 1.27527  |
| C                     | -2.08882 | 1.786515 | -0.15915 | C                     | -2.54487 | -0.90194 | 0.8029   |
| H                     | -1.41593 | 2.619499 | -0.36065 | H                     | -2.26994 | -1.86612 | 1.22939  |
| H                     | -2.9125  | 1.806249 | -0.87199 | H                     | -3.11376 | -0.32932 | 1.534733 |
| H                     | -2.48057 | 1.877534 | 0.854056 | H                     | -3.1521  | -1.06491 | -0.08751 |
| O                     | -2.19916 | -0.56239 | 0.046581 | O                     | -1.67389 | 1.046788 | -0.19675 |
| O                     | -1.54421 | -1.75553 | -0.22577 | O                     | -0.52056 | 1.800295 | -0.38634 |
| $E_{0K}=-496.6270238$ |          |          |          | $E_{0K}=-496.6272368$ |          |          |          |

**Table S44.** Cartesian coordinates of the transition state 1 (TS1) within boat-ax structures.

| Structure 25          |          |          |          | Structure 26          |          |          |          |
|-----------------------|----------|----------|----------|-----------------------|----------|----------|----------|
| C                     | -3.46191 | 0.103382 | -0.67194 | C                     | -3.43121 | -0.07512 | -0.67374 |
| H                     | -3.75017 | -0.93197 | -0.85768 | H                     | -3.09034 | 0.263776 | -1.65273 |
| H                     | -3.10548 | 0.539704 | -1.6056  | H                     | -3.92527 | 0.757554 | -0.1719  |
| H                     | -4.34102 | 0.657941 | -0.33978 | H                     | -4.15469 | -0.88052 | -0.81299 |
| C                     | -2.3776  | 0.17045  | 0.37965  | C                     | -2.25871 | -0.5645  | 0.145139 |
| H                     | -2.0724  | 1.204794 | 0.573032 | H                     | -2.57581 | -0.89397 | 1.142231 |
| H                     | -2.71381 | -0.27393 | 1.325055 | H                     | -1.74886 | -1.39935 | -0.34418 |
| O                     | -1.24883 | -0.55183 | -0.10561 | O                     | -1.34349 | 0.529764 | 0.286839 |
| C                     | -0.23441 | -0.65973 | 0.802129 | C                     | -0.24922 | 0.265467 | 1.053746 |
| H                     | -0.48671 | -1.21664 | 1.710595 | H                     | -0.44282 | 0.180178 | 2.127195 |
| H                     | 0.144891 | 0.554468 | 1.13734  | H                     | 0.571076 | 1.291251 | 0.827114 |
| O                     | 0.907864 | -1.14278 | 0.246322 | O                     | 0.53534  | -0.78789 | 0.651489 |
| C                     | 1.599196 | -0.24313 | -0.63792 | C                     | 1.369263 | -0.57822 | -0.50115 |
| H                     | 1.409471 | -0.54715 | -1.66927 | H                     | 0.964275 | -1.15057 | -1.33929 |
| C                     | 3.061183 | -0.27485 | -0.26699 | C                     | 2.775102 | -0.98821 | -0.13528 |
| H                     | 3.421542 | -1.30345 | -0.29265 | H                     | 2.770881 | -2.01492 | 0.231152 |
| H                     | 3.63092  | 0.326118 | -0.97627 | H                     | 3.416065 | -0.91971 | -1.0148  |
| H                     | 3.187723 | 0.126936 | 0.737947 | H                     | 3.153253 | -0.3289  | 0.645322 |
| O                     | 1.03072  | 1.042565 | -0.57007 | O                     | 1.265729 | 0.752448 | -0.93881 |
| O                     | 0.954782 | 1.437837 | 0.757822 | O                     | 1.521276 | 1.598013 | 0.129299 |
| $E_{0K}=-496.6245594$ |          |          |          | $E_{0K}=-496.6193651$ |          |          |          |

| Structure 27 |          |          |         | Structure 28 |          |          |          |
|--------------|----------|----------|---------|--------------|----------|----------|----------|
| C            | -2.64429 | 1.024501 | -0.2426 | C            | 2.869032 | -0.64485 | 0.748913 |

|                       |          |          |          |                     |          |          |          |
|-----------------------|----------|----------|----------|---------------------|----------|----------|----------|
| H                     | -2.47216 | 1.259748 | -1.29346 | H                   | 3.60423  | -1.04327 | 0.047941 |
| H                     | -1.91423 | 1.574098 | 0.353085 | H                   | 2.150081 | -1.4282  | 0.987691 |
| H                     | -3.64723 | 1.3575   | 0.03304  | H                   | 3.387569 | -0.34756 | 1.663093 |
| C                     | -2.51753 | -0.47263 | -0.02162 | C                   | 2.164716 | 0.553762 | 0.144538 |
| H                     | -2.70766 | -0.74067 | 1.02432  | H                   | 1.403537 | 0.954825 | 0.819239 |
| H                     | -3.22114 | -1.02421 | -0.64545 | H                   | 2.873314 | 1.34777  | -0.0942  |
| O                     | -1.22085 | -0.93614 | -0.40302 | O                   | 1.548143 | 0.205834 | -1.10816 |
| C                     | -0.30019 | -0.95162 | 0.605603 | C                   | 0.212966 | 0.009786 | -1.07067 |
| H                     | -0.53768 | -1.63095 | 1.431051 | H                   | -0.15414 | -0.23468 | -2.07107 |
| H                     | -0.15807 | 0.258079 | 1.094615 | H                   | -0.43401 | 1.079813 | -0.70796 |
| O                     | 0.958197 | -1.18406 | 0.146122 | O                   | -0.17082 | -0.89813 | -0.0915  |
| C                     | 1.559444 | -0.10573 | -0.58835 | C                   | -1.4011  | -0.60875 | 0.562414 |
| H                     | 1.485894 | -0.31736 | -1.65709 | H                   | -1.41272 | -1.2462  | 1.446056 |
| C                     | 2.980738 | 0.035631 | -0.10369 | C                   | -2.60512 | -0.84296 | -0.32511 |
| H                     | 3.495574 | -0.92065 | -0.19903 | H                   | -2.6199  | -1.88817 | -0.63515 |
| H                     | 3.498063 | 0.786421 | -0.70156 | H                   | -3.51335 | -0.62127 | 0.236139 |
| H                     | 2.975384 | 0.339927 | 0.942652 | H                   | -2.58152 | -0.20403 | -1.20645 |
| O                     | 0.797322 | 1.070365 | -0.4386  | O                   | -1.31346 | 0.697906 | 1.077976 |
| O                     | 0.557108 | 1.284479 | 0.910715 | O                   | -1.33212 | 1.598019 | 0.015958 |
| $E_{0K}=-496.6233179$ |          |          |          | $E_{0K}=-496.62685$ |          |          |          |

| Structure 29          |          |          |          | Structure 30          |          |          |          |
|-----------------------|----------|----------|----------|-----------------------|----------|----------|----------|
| C                     | 3.296999 | -0.0142  | -0.4451  | C                     | 2.416971 | 1.21062  | -0.50198 |
| H                     | 2.909004 | 0.069034 | -1.46232 | H                     | 1.676831 | 1.814114 | 0.023843 |
| H                     | 3.653772 | -1.03368 | -0.28628 | H                     | 2.127607 | 1.124415 | -1.55108 |
| H                     | 4.146157 | 0.666254 | -0.35928 | H                     | 3.380295 | 1.72339  | -0.45062 |
| C                     | 2.247027 | 0.349641 | 0.59177  | C                     | 2.537127 | -0.17293 | 0.112594 |
| H                     | 2.67225  | 0.337442 | 1.594334 | H                     | 3.342296 | -0.7355  | -0.36036 |
| H                     | 1.828385 | 1.344656 | 0.404582 | H                     | 2.743237 | -0.11512 | 1.187669 |
| O                     | 1.16907  | -0.58515 | 0.646097 | O                     | 1.359952 | -0.96643 | -0.10005 |
| C                     | 0.420241 | -0.68211 | -0.49343 | C                     | 0.366533 | -0.81167 | 0.816521 |
| H                     | 0.872279 | -1.24701 | -1.31268 | H                     | 0.625196 | -1.10826 | 1.837111 |
| H                     | 0.143246 | 0.542522 | -0.9073  | H                     | -0.62631 | -1.57679 | 0.359107 |
| O                     | -0.83371 | -1.14621 | -0.24294 | O                     | -0.2595  | 0.412344 | 0.854303 |
| C                     | -1.68162 | -0.25109 | 0.493165 | C                     | -1.14523 | 0.722708 | -0.23289 |
| H                     | -1.70979 | -0.56319 | 1.539122 | H                     | -0.66613 | 1.460394 | -0.88191 |
| C                     | -3.03599 | -0.26201 | -0.17098 | C                     | -2.44561 | 1.211884 | 0.35674  |
| H                     | -3.40342 | -1.28651 | -0.23412 | H                     | -2.25031 | 2.049803 | 1.026332 |
| H                     | -3.73429 | 0.338058 | 0.412947 | H                     | -3.11092 | 1.535504 | -0.44427 |
| H                     | -2.94756 | 0.152002 | -1.17516 | H                     | -2.91438 | 0.404141 | 0.918018 |
| O                     | -1.10146 | 1.032968 | 0.556753 | O                     | -1.29378 | -0.39517 | -1.07243 |
| O                     | -0.72265 | 1.428267 | -0.71821 | O                     | -1.64494 | -1.49322 | -0.30305 |
| $E_{0K}=-496.6222447$ |          |          |          | $E_{0K}=-496.6178647$ |          |          |          |

**Table S45.** Cartesian coordinates of the transition state 2 (TS2).

| BC-eq                 |          |          |          | TBC-eq                |          |          |          |
|-----------------------|----------|----------|----------|-----------------------|----------|----------|----------|
| C                     | 3.029715 | -0.70296 | 0.395356 | C                     | 3.004718 | 0.522657 | -0.60144 |
| H                     | 2.958735 | -0.64903 | 1.48259  | H                     | 2.557091 | 0.859808 | -1.53734 |
| H                     | 3.870172 | -0.07936 | 0.075743 | H                     | 3.732243 | -0.26216 | -0.82982 |
| H                     | 3.227588 | -1.73403 | 0.100997 | H                     | 3.525857 | 1.358521 | -0.13391 |
| C                     | 1.756028 | -0.21838 | -0.2316  | C                     | 1.939462 | -0.00368 | 0.313267 |
| H                     | 1.681671 | -0.33071 | -1.32239 | H                     | 2.264716 | -0.25276 | 1.331473 |
| H                     | 0.794618 | -1.00893 | 0.099463 | H                     | 1.082606 | 0.938761 | 0.535278 |
| O                     | 1.447866 | 1.05947  | 0.184847 | O                     | 1.224758 | -1.02018 | -0.28515 |
| C                     | 0.242272 | 1.590797 | -0.30131 | C                     | 0.124709 | -1.53419 | 0.431847 |
| H                     | 0.148188 | 1.395208 | -1.37762 | H                     | 0.17808  | -1.21004 | 1.480159 |
| H                     | 0.29295  | 2.657842 | -0.09366 | H                     | 0.17488  | -2.61884 | 0.354417 |
| O                     | -0.85339 | 1.066223 | 0.394692 | O                     | -1.08765 | -1.16484 | -0.14388 |
| C                     | -1.69759 | 0.180483 | -0.29566 | C                     | -1.61521 | 0.091542 | 0.204018 |
| H                     | -2.14183 | 0.668696 | -1.17201 | H                     | -1.66617 | 0.188547 | 1.2943   |
| C                     | -2.73687 | -0.30774 | 0.682214 | C                     | -2.95777 | 0.214364 | -0.47422 |
| H                     | -3.30076 | 0.540206 | 1.070394 | H                     | -3.5944  | -0.61868 | -0.1785  |
| H                     | -3.41495 | -0.99879 | 0.181397 | H                     | -3.42813 | 1.156557 | -0.19626 |
| H                     | -2.23949 | -0.81754 | 1.506314 | H                     | -2.81507 | 0.18653  | -1.55507 |
| O                     | -0.96963 | -0.87722 | -0.89983 | O                     | -0.81031 | 1.15923  | -0.26762 |
| O                     | -0.30463 | -1.61058 | 0.064632 | O                     | 0.049805 | 1.59198  | 0.720956 |
| $E_{0K}=-496.6331929$ |          |          |          | $E_{0K}=-496.6319571$ |          |          |          |

| BC-ax |          |          |          | TBC-ax |          |          |          |
|-------|----------|----------|----------|--------|----------|----------|----------|
| C     | -2.39226 | -0.83946 | 0.610257 | C      | 2.935192 | 0.323367 | 0.529651 |
| H     | -3.24174 | -0.24575 | 0.962147 | H      | 3.704724 | -0.44199 | 0.388242 |
| H     | -1.66136 | -0.92977 | 1.415415 | H      | 2.498766 | 0.194697 | 1.52177  |
| H     | -2.7415  | -1.84376 | 0.368186 | H      | 3.410397 | 1.304734 | 0.497645 |
| C     | -1.80127 | -0.21013 | -0.62864 | C      | 1.90404  | 0.223458 | -0.56938 |
| H     | -0.71803 | -0.8981  | -0.83473 | H      | 1.001908 | 1.107399 | -0.26904 |
| H     | -2.38794 | -0.34782 | -1.53622 | H      | 2.263372 | 0.510273 | -1.55696 |
| O     | -1.46314 | 1.128844 | -0.54906 | O      | 1.238489 | -0.98201 | -0.69041 |
| C     | -0.45816 | 1.496914 | 0.360023 | C      | 0.362446 | -1.37029 | 0.341787 |
| H     | -0.61861 | 1.034688 | 1.340257 | H      | 0.598499 | -0.84331 | 1.273513 |
| H     | -0.52029 | 2.581142 | 0.425197 | H      | 0.486518 | -2.44513 | 0.459301 |
| O     | 0.808051 | 1.164756 | -0.14176 | O      | -0.97303 | -1.16828 | -0.01022 |
| C     | 1.502545 | 0.127132 | 0.497614 | C      | -1.56775 | 0.057306 | 0.334019 |
| H     | 1.686772 | 0.370243 | 1.55143  | H      | -1.3751  | 0.283489 | 1.389026 |
| C     | 2.778493 | -0.10867 | -0.27152 | C      | -3.03637 | -0.04702 | 0.001543 |
| H     | 3.375456 | 0.802994 | -0.2763  | H      | -3.47004 | -0.89316 | 0.533022 |
| H     | 3.345104 | -0.91369 | 0.196407 | H      | -3.54865 | 0.870884 | 0.286409 |
| H     | 2.532468 | -0.38318 | -1.29631 | H      | -3.14871 | -0.20655 | -1.0714  |
| O     | 0.704614 | -1.04226 | 0.614342 | O      | -1.05553 | 1.13902  | -0.42277 |
| O     | 0.347166 | -1.50406 | -0.63877 | O      | 0.039188 | 1.690987 | 0.213737 |



$E_{0K}=-496.6306373$  $E_{0K}=-496.6288796$ **Table S46.** Cartesian coordinates of the transition state 3 (TS3) within chair-eq1-ax2 structures.

| Structure 1           |          |          |          | Structure 2           |          |          |          |
|-----------------------|----------|----------|----------|-----------------------|----------|----------|----------|
| C                     | 2.924707 | 0.224135 | -0.7013  | C                     | -2.77954 | -0.51376 | 1.998734 |
| H                     | 2.520394 | -0.17709 | -1.63255 | H                     | -3.30482 | 0.441631 | 2.013525 |
| H                     | 3.660826 | -0.47659 | -0.30272 | H                     | -2.11647 | -0.55691 | 2.86376  |
| H                     | 3.433924 | 1.159183 | -0.94179 | H                     | -3.51098 | -1.31979 | 2.077805 |
| C                     | 1.836604 | 0.491387 | 0.326524 | C                     | -1.98293 | -0.65584 | 0.720998 |
| H                     | 2.247286 | 1.008104 | 1.19307  | H                     | -1.44761 | -1.6107  | 0.68962  |
| H                     | 1.04502  | 1.114431 | -0.10252 | H                     | -2.63692 | -0.60507 | -0.15899 |
| O                     | 1.266614 | -0.69903 | 0.869831 | O                     | -1.04749 | 0.418713 | 0.674041 |
| C                     | 0.627426 | -1.50887 | -0.03668 | C                     | -0.32646 | 0.467689 | -0.49261 |
| H                     | 1.277047 | -1.89998 | -0.82125 | H                     | -0.95244 | 0.47881  | -1.38857 |
| O                     | -0.43111 | -0.84922 | -0.69569 | O                     | 0.541284 | -0.63543 | -0.63508 |
| C                     | -1.44894 | -0.43675 | 0.156348 | C                     | 1.508063 | -0.71339 | 0.359367 |
| H                     | -1.42157 | -1.40036 | 1.059589 | H                     | 1.732646 | 0.567768 | 0.584614 |
| C                     | -2.76091 | -0.33428 | -0.5601  | C                     | 2.723032 | -1.45517 | -0.10829 |
| H                     | -3.01697 | -1.28882 | -1.0213  | H                     | 3.135115 | -0.98397 | -1.00134 |
| H                     | -3.55048 | -0.04831 | 0.135294 | H                     | 3.482661 | -1.46846 | 0.673716 |
| H                     | -2.70372 | 0.422773 | -1.34888 | H                     | 2.463086 | -2.48943 | -0.35573 |
| H                     | -1.15985 | 0.413755 | 0.781755 | H                     | 1.093629 | -1.00384 | 1.329835 |
| O                     | 0.114853 | -2.63271 | 0.606036 | O                     | 0.433846 | 1.632189 | -0.54708 |
| O                     | -0.73907 | -2.24744 | 1.632537 | O                     | 1.264969 | 1.707461 | 0.564871 |
| $E_{0K}=-496.6296726$ |          |          |          | $E_{0K}=-496.6285314$ |          |          |          |

| Structure 3 |          |          |          | Structure 4 |          |          |          |
|-------------|----------|----------|----------|-------------|----------|----------|----------|
| C           | -1.55933 | -2.01392 | 0.952544 | C           | -1.25085 | 2.969325 | 1.181721 |
| H           | -1.13675 | -1.99033 | 1.958891 | H           | -0.49306 | 3.353244 | 0.50055  |
| H           | -0.80972 | -2.39818 | 0.25997  | H           | -0.78002 | 2.773277 | 2.146142 |
| H           | -2.41021 | -2.69873 | 0.956003 | H           | -2.02434 | 3.72862  | 1.319431 |
| C           | -2.02318 | -0.62357 | 0.551312 | C           | -1.88374 | 1.698055 | 0.646535 |
| H           | -2.42712 | -0.62458 | -0.46826 | H           | -2.67883 | 1.3535   | 1.308961 |
| H           | -2.80843 | -0.2756  | 1.222787 | H           | -2.31769 | 1.86265  | -0.34663 |
| O           | -0.98771 | 0.353861 | 0.652959 | O           | -0.95499 | 0.610859 | 0.581106 |
| C           | -0.2375  | 0.524534 | -0.48212 | C           | -0.34297 | 0.444695 | -0.63372 |
| H           | -0.8417  | 0.619727 | -1.38761 | H           | -1.04464 | 0.326181 | -1.46362 |
| O           | 0.652875 | -0.54461 | -0.72045 | O           | 0.459456 | -0.68824 | -0.58527 |
| C           | 1.611229 | -0.70804 | 0.27195  | C           | 1.489996 | -0.60504 | 0.34352  |
| H           | 1.808001 | 0.546996 | 0.634051 | H           | 1.803415 | 0.665166 | 0.238252 |
| C           | 2.844274 | -1.37606 | -0.25594 | C           | 2.618993 | -1.52472 | -0.00766 |
| H           | 3.255454 | -0.81008 | -1.09259 | H           | 2.988646 | -1.31056 | -1.01109 |
| H           | 3.597186 | -1.45525 | 0.528685 | H           | 3.434116 | -1.41183 | 0.707506 |

|                       |          |          |          |                       |          |          |          |
|-----------------------|----------|----------|----------|-----------------------|----------|----------|----------|
| H                     | 2.606109 | -2.38472 | -0.60918 | H                     | 2.278341 | -2.56465 | 0.018201 |
| H                     | 1.191664 | -1.10616 | 1.200641 | H                     | 1.125388 | -0.63215 | 1.373318 |
| O                     | 0.508318 | 1.69828  | -0.4024  | O                     | 0.463221 | 1.538877 | -1.02508 |
| O                     | 1.314652 | 1.669867 | 0.72938  | O                     | 1.400346 | 1.809151 | -0.03366 |
| $E_{0K}=-496.6286764$ |          |          |          | $E_{0K}=-496.6278814$ |          |          |          |

| Structure 5           |          |          |          | Structure 6           |          |          |          |
|-----------------------|----------|----------|----------|-----------------------|----------|----------|----------|
| C                     | -2.74628 | 1.455143 | 1.949877 | C                     | -2.8412  | 1.936288 | -0.35183 |
| H                     | -2.14264 | 1.245597 | 2.834006 | H                     | -3.47705 | 1.081627 | -0.59233 |
| H                     | -3.40842 | 0.607078 | 1.770898 | H                     | -2.33246 | 2.269859 | -1.25846 |
| H                     | -3.35391 | 2.340033 | 2.146484 | H                     | -3.4794  | 2.754643 | -0.01359 |
| C                     | -1.85247 | 1.695062 | 0.753964 | C                     | -1.8538  | 1.579942 | 0.746997 |
| H                     | -2.44373 | 1.893593 | -0.14887 | H                     | -1.15642 | 2.399648 | 0.934755 |
| H                     | -1.17859 | 2.539453 | 0.917655 | H                     | -2.37667 | 1.347658 | 1.674023 |
| O                     | -1.07406 | 0.514124 | 0.554256 | O                     | -1.10528 | 0.393402 | 0.464532 |
| C                     | -0.35782 | 0.507469 | -0.61594 | C                     | -0.35925 | 0.423293 | -0.68833 |
| H                     | -0.98183 | 0.488351 | -1.51355 | H                     | -0.94843 | 0.381039 | -1.60639 |
| O                     | 0.461336 | -0.61525 | -0.63483 | O                     | 0.498742 | -0.67153 | -0.69017 |
| C                     | 1.397186 | -0.63552 | 0.393139 | C                     | 1.402242 | -0.66965 | 0.365557 |
| H                     | 1.669852 | 0.648346 | 0.499691 | H                     | 1.635624 | 0.618143 | 0.48092  |
| C                     | 2.591494 | -1.46372 | 0.030716 | C                     | 2.629301 | -1.46398 | 0.037848 |
| H                     | 3.045619 | -1.09711 | -0.89061 | H                     | 3.100488 | -1.08355 | -0.86916 |
| H                     | 3.329607 | -1.43306 | 0.832522 | H                     | 3.342123 | -1.41477 | 0.861312 |
| H                     | 2.293133 | -2.5054  | -0.12462 | H                     | 2.364138 | -2.51308 | -0.12728 |
| H                     | 0.939978 | -0.81722 | 1.368741 | H                     | 0.921291 | -0.86607 | 1.326673 |
| O                     | 0.456037 | 1.649264 | -0.78432 | O                     | 0.418105 | 1.593944 | -0.82672 |
| O                     | 1.259583 | 1.809508 | 0.339252 | O                     | 1.19393  | 1.770854 | 0.314593 |
| $E_{0K}=-496.6264051$ |          |          |          | $E_{0K}=-496.6252465$ |          |          |          |

**Table S47.** Cartesian coordinates of the transition state 3 (TS3) within chair-ax1-eq2 structures.

| Structure 1 |          |          | Structure 2 |   |          |          |          |
|-------------|----------|----------|-------------|---|----------|----------|----------|
| C           | -3.55333 | -0.40831 | -0.0016     | C | -3.44292 | 0.29397  | 1.63742  |
| H           | -4.21767 | -0.4832  | -0.86425    | H | -3.99599 | 0.90147  | 2.355635 |
| H           | -3.88392 | 0.422431 | 0.62298     | H | -3.49048 | -0.75003 | 1.949287 |
| H           | -3.62759 | -1.33016 | 0.576926    | H | -3.91845 | 0.387392 | 0.660631 |
| C           | -2.13116 | -0.18898 | -0.46471    | C | -2.00622 | 0.758461 | 1.564503 |
| H           | -1.77678 | -1.01688 | -1.08135    | H | -1.93999 | 1.800688 | 1.241688 |
| H           | -2.03282 | 0.740919 | -1.0285     | H | -1.50889 | 0.662478 | 2.537452 |
| O           | -1.31743 | -0.11047 | 0.720857    | O | -1.33486 | -0.07399 | 0.6147   |
| C           | -0.00837 | 0.153969 | 0.533125    | C | -0.01694 | 0.20556  | 0.48155  |
| H           | 0.506008 | 0.16004  | 1.496341    | H | 0.514898 | 0.309769 | 1.438319 |
| O           | 0.560818 | -0.79776 | -0.35247    | O | 0.533843 | -0.80906 | -0.30897 |
| C           | 1.899043 | -0.59598 | -0.64548    | C | 1.874157 | -0.62716 | -0.61473 |

|                       |          |          |          |                       |          |          |          |
|-----------------------|----------|----------|----------|-----------------------|----------|----------|----------|
| H                     | 1.958173 | 0.739491 | -0.60051 | H                     | 1.941172 | 0.71068  | -0.66493 |
| C                     | 2.881836 | -1.06847 | 0.395771 | C                     | 2.857857 | -1.032   | 0.453817 |
| H                     | 2.775901 | -2.14673 | 0.548282 | H                     | 2.747464 | -2.09721 | 0.678197 |
| H                     | 3.900456 | -0.86243 | 0.064503 | H                     | 3.876226 | -0.8538  | 0.10607  |
| H                     | 2.727032 | -0.56746 | 1.352985 | H                     | 2.709017 | -0.46751 | 1.376015 |
| H                     | 2.095345 | -0.91271 | -1.66858 | H                     | 2.065526 | -1.01475 | -1.61364 |
| O                     | 0.144217 | 1.416583 | -0.08729 | O                     | 0.127169 | 1.421257 | -0.23212 |
| O                     | 1.493364 | 1.729557 | -0.07128 | O                     | 1.475582 | 1.741559 | -0.21907 |
| $E_{0K}=-496.6266108$ |          |          |          | $E_{0K}=-496.6241996$ |          |          |          |

| Structure 3           |          |          |          | Structure 4           |          |          |          |
|-----------------------|----------|----------|----------|-----------------------|----------|----------|----------|
| C                     | -3.15011 | -1.43476 | 1.436441 | C                     | -2.25913 | -1.71461 | -1.01701 |
| H                     | -3.4304  | -2.35161 | 1.957683 | H                     | -2.88607 | -1.74333 | -1.9111  |
| H                     | -3.61512 | -1.43672 | 0.450108 | H                     | -2.77493 | -2.2457  | -0.21544 |
| H                     | -3.52927 | -0.58034 | 1.998024 | H                     | -1.31847 | -2.22359 | -1.22816 |
| C                     | -1.64641 | -1.35383 | 1.302503 | C                     | -2.00046 | -0.27754 | -0.61269 |
| H                     | -1.1616  | -1.33621 | 2.286895 | H                     | -1.45937 | 0.267653 | -1.38658 |
| H                     | -1.24963 | -2.19927 | 0.734314 | H                     | -2.93112 | 0.25091  | -0.40461 |
| O                     | -1.34123 | -0.14157 | 0.611631 | O                     | -1.25394 | -0.23819 | 0.62121  |
| C                     | -0.01563 | 0.114538 | 0.516318 | C                     | 0.045741 | 0.100469 | 0.529307 |
| H                     | 0.506266 | 0.119859 | 1.483202 | H                     | 0.51951  | 0.019267 | 1.509637 |
| O                     | 0.586308 | -0.83498 | -0.35428 | O                     | 0.696702 | -0.71752 | -0.43412 |
| C                     | 1.922241 | -0.5942  | -0.62918 | C                     | 2.03316  | -0.42259 | -0.64876 |
| H                     | 1.944368 | 0.742175 | -0.56803 | H                     | 2.024564 | 0.899933 | -0.44987 |
| C                     | 2.910048 | -1.05596 | 0.412608 | C                     | 3.000522 | -0.96763 | 0.370989 |
| H                     | 2.833748 | -2.13947 | 0.54614  | H                     | 2.944613 | -2.0601  | 0.394356 |
| H                     | 3.925341 | -0.8172  | 0.09324  | H                     | 4.018675 | -0.67697 | 0.108923 |
| H                     | 2.734469 | -0.57557 | 1.376859 | H                     | 2.785126 | -0.58939 | 1.371917 |
| H                     | 2.136615 | -0.88709 | -1.65569 | H                     | 2.280248 | -0.60942 | -1.69264 |
| O                     | 0.100652 | 1.369932 | -0.08852 | O                     | 0.161753 | 1.431749 | 0.060898 |
| O                     | 1.441628 | 1.716219 | -0.03786 | O                     | 1.4928   | 1.800183 | 0.166373 |
| $E_{0K}=-496.6241072$ |          |          |          | $E_{0K}=-496.6263942$ |          |          |          |

| Structure 5 |          |          |          | Structure 6 |          |          |          |
|-------------|----------|----------|----------|-------------|----------|----------|----------|
| C           | -2.56126 | 2.101798 | 0.730472 | C           | -0.97765 | -1.45265 | 2.710471 |
| H           | -3.1299  | 2.71403  | 1.434097 | H           | -1.3837  | -2.34715 | 3.186249 |
| H           | -3.24086 | 1.736714 | -0.04071 | H           | -1.16234 | -0.59965 | 3.36646  |
| H           | -1.79761 | 2.719702 | 0.25883  | H           | 0.100552 | -1.59551 | 2.607615 |
| C           | -1.93256 | 0.930499 | 1.461471 | C           | -1.65003 | -1.25166 | 1.362477 |
| H           | -1.2286  | 1.273709 | 2.22753  | H           | -1.39581 | -2.05999 | 0.673297 |
| H           | -2.69396 | 0.319797 | 1.947848 | H           | -2.7327  | -1.21509 | 1.472491 |
| O           | -1.25943 | 0.046337 | 0.556746 | O           | -1.32462 | 0.000211 | 0.750519 |
| C           | 0.073832 | 0.246871 | 0.447278 | C           | -0.00295 | 0.222736 | 0.548641 |

|                       |          |          |          |                       |          |          |          |
|-----------------------|----------|----------|----------|-----------------------|----------|----------|----------|
| H                     | 0.597443 | 0.302996 | 1.412157 | H                     | 0.578481 | 0.370568 | 1.466657 |
| O                     | 0.570572 | -0.78967 | -0.35011 | O                     | 0.551928 | -0.84479 | -0.20874 |
| C                     | 1.926013 | -0.69618 | -0.62644 | C                     | 1.877225 | -0.65354 | -0.56465 |
| H                     | 2.084747 | 0.632455 | -0.65654 | H                     | 1.903228 | 0.681788 | -0.69026 |
| C                     | 2.857978 | -1.18121 | 0.455132 | C                     | 2.89957  | -0.97877 | 0.495114 |
| H                     | 2.671732 | -2.23961 | 0.660648 | H                     | 2.823477 | -2.034   | 0.775872 |
| H                     | 3.892972 | -1.06717 | 0.130251 | H                     | 3.904323 | -0.79445 | 0.112674 |
| H                     | 2.728307 | -0.62115 | 1.382876 | H                     | 2.760097 | -0.37147 | 1.391549 |
| H                     | 2.110914 | -1.08369 | -1.6266  | H                     | 2.051931 | -1.08588 | -1.54843 |
| O                     | 0.315101 | 1.462887 | -0.24416 | O                     | 0.07986  | 1.37754  | -0.23671 |
| O                     | 1.682697 | 1.688233 | -0.20296 | O                     | 1.420652 | 1.723911 | -0.29159 |
| $E_{0K}=-496.6239259$ |          |          |          | $E_{0K}=-496.6217857$ |          |          |          |

| Structure 7           |          |          |          | Structure 8           |          |          |          |
|-----------------------|----------|----------|----------|-----------------------|----------|----------|----------|
| C                     | -2.79716 | 1.279614 | -0.73703 | C                     | -1.58948 | 0.635153 | 3.061176 |
| H                     | -3.46934 | 1.21796  | -1.59595 | H                     | -2.09731 | 1.343125 | 3.719304 |
| H                     | -2.09635 | 2.09933  | -0.89658 | H                     | -0.52574 | 0.654322 | 3.307103 |
| H                     | -3.39104 | 1.492217 | 0.153206 | H                     | -1.97286 | -0.36592 | 3.262305 |
| C                     | -2.05381 | -0.03109 | -0.57185 | C                     | -1.83696 | 1.008558 | 1.610385 |
| H                     | -2.74428 | -0.86236 | -0.42718 | H                     | -2.90138 | 0.988286 | 1.380749 |
| H                     | -1.42438 | -0.25096 | -1.4348  | H                     | -1.46182 | 2.008639 | 1.375597 |
| O                     | -1.24238 | -0.00097 | 0.620252 | O                     | -1.24933 | 0.055671 | 0.716314 |
| C                     | 0.078376 | 0.198963 | 0.449884 | C                     | 0.051219 | 0.298092 | 0.429429 |
| H                     | 0.568206 | 0.270111 | 1.423039 | H                     | 0.656532 | 0.613477 | 1.290305 |
| O                     | 0.63268  | -0.85029 | -0.33238 | O                     | 0.56095  | -0.86529 | -0.15779 |
| C                     | 1.98366  | -0.72628 | -0.60699 | C                     | 1.869398 | -0.75229 | -0.60302 |
| H                     | 2.094757 | 0.601703 | -0.68454 | H                     | 1.906244 | 0.542083 | -0.95101 |
| C                     | 2.923352 | -1.1363  | 0.49872  | C                     | 2.940659 | -0.9091  | 0.446399 |
| H                     | 2.769236 | -2.19036 | 0.748258 | H                     | 2.871061 | -1.89979 | 0.905648 |
| H                     | 3.956716 | -1.00245 | 0.17623  | H                     | 3.925394 | -0.80685 | -0.01142 |
| H                     | 2.768125 | -0.54173 | 1.400743 | H                     | 2.850748 | -0.15689 | 1.232205 |
| H                     | 2.191445 | -1.14396 | -1.59099 | H                     | 1.990702 | -1.35067 | -1.50405 |
| O                     | 0.297464 | 1.392927 | -0.27921 | O                     | 0.116953 | 1.326157 | -0.54492 |
| O                     | 1.657604 | 1.656258 | -0.26211 | O                     | 1.456587 | 1.644192 | -0.70638 |
| $E_{0K}=-496.6264768$ |          |          |          | $E_{0K}=-496.6235595$ |          |          |          |

| Structure 9 |          |          |          |
|-------------|----------|----------|----------|
| C           | -1.13554 | -2.64713 | 0.92506  |
| H           | -1.55902 | -3.40281 | 1.589939 |
| H           | -0.04884 | -2.66811 | 1.030425 |
| H           | -1.38085 | -2.90375 | -0.10624 |
| C           | -1.70262 | -1.28268 | 1.274838 |
| H           | -2.78934 | -1.28239 | 1.205711 |

|   |          |          |          |
|---|----------|----------|----------|
| H | -1.42686 | -0.98642 | 2.293594 |
| O | -1.28777 | -0.26395 | 0.363628 |
| C | 0.030649 | 0.033926 | 0.399109 |
| H | 0.507593 | -0.1711  | 1.367208 |
| O | 0.692889 | -0.67415 | -0.63868 |
| C | 2.034066 | -0.36429 | -0.78603 |
| H | 2.02326  | 0.923845 | -0.42808 |
| C | 2.978628 | -1.03906 | 0.177246 |
| H | 2.915314 | -2.12584 | 0.0631   |
| H | 4.004299 | -0.72926 | -0.02717 |
| H | 2.747764 | -0.78574 | 1.213806 |
| H | 2.30313  | -0.42154 | -1.83944 |
| O | 0.147674 | 1.401716 | 0.107576 |
| O | 1.478907 | 1.742601 | 0.288613 |

$E_{0K}=-496.6222707$

**Table S48.** Cartesian coordinates of the transition state 3 (TS3) within chair-ax1-ax2 structures.

| Structure 1          |          |          |          | Structure 2           |          |          |          |
|----------------------|----------|----------|----------|-----------------------|----------|----------|----------|
| C                    | -3.07663 | 0.038669 | 0.154398 | C                     | -2.37445 | 1.355345 | -1.65464 |
| H                    | -2.92912 | -0.38009 | 1.151539 | H                     | -2.79064 | 0.537132 | -2.24313 |
| H                    | -3.40165 | -0.75863 | -0.51558 | H                     | -1.60806 | 1.853751 | -2.25036 |
| H                    | -3.87462 | 0.780381 | 0.225443 | H                     | -3.16753 | 2.072422 | -1.43628 |
| C                    | -1.81597 | 0.695688 | -0.38461 | C                     | -1.77816 | 0.828602 | -0.36833 |
| H                    | -2.01572 | 1.17202  | -1.34447 | H                     | -1.34304 | 1.637522 | 0.227761 |
| H                    | -1.44099 | 1.46001  | 0.303453 | H                     | -2.53827 | 0.326081 | 0.243438 |
| O                    | -0.78085 | -0.24755 | -0.66194 | O                     | -0.76174 | -0.10727 | -0.71669 |
| C                    | -0.14745 | -0.75304 | 0.447981 | C                     | -0.17058 | -0.70767 | 0.367842 |
| H                    | -0.82307 | -1.22052 | 1.166682 | H                     | -0.89215 | -1.17687 | 1.042046 |
| O                    | 0.559372 | 0.232422 | 1.172981 | O                     | 0.566116 | 0.196622 | 1.164997 |
| C                    | 1.676242 | 0.764525 | 0.532643 | C                     | 1.717988 | 0.713371 | 0.577628 |
| H                    | 2.043075 | -0.262   | -0.22325 | H                     | 2.054776 | -0.28339 | -0.22962 |
| C                    | 1.428002 | 1.900316 | -0.42726 | C                     | 1.53847  | 1.912425 | -0.31881 |
| H                    | 2.379994 | 2.269229 | -0.81205 | H                     | 2.512157 | 2.255922 | -0.67152 |
| H                    | 0.807895 | 1.578558 | -1.26437 | H                     | 0.915527 | 1.668146 | -1.17987 |
| H                    | 0.925931 | 2.723914 | 0.091531 | H                     | 1.069507 | 2.728886 | 0.24066  |
| H                    | 2.456495 | 0.930021 | 1.274494 | H                     | 2.489686 | 0.801092 | 1.341368 |
| O                    | 0.740063 | -1.75628 | 0.072015 | O                     | 0.675852 | -1.72916 | -0.04948 |
| O                    | 1.667613 | -1.24866 | -0.82926 | O                     | 1.64593  | -1.21409 | -0.90069 |
| $E_{0K}=-496.622946$ |          |          |          | $E_{0K}=-496.6254312$ |          |          |          |

| Structure 3 |          |          |          | Structure 4 |          |          |          |
|-------------|----------|----------|----------|-------------|----------|----------|----------|
| C           | -0.53371 | -1.94131 | -2.50826 | C           | -2.28352 | -0.51699 | -2.43723 |
| H           | 0.269691 | -2.523   | -2.0586  | H           | -1.6578  | 0.128288 | -3.05568 |

|                               |          |          |          |                               |          |          |          |
|-------------------------------|----------|----------|----------|-------------------------------|----------|----------|----------|
| H                             | -0.09054 | -1.18522 | -3.15838 | H                             | -3.03053 | 0.099324 | -1.93543 |
| H                             | -1.15467 | -2.60259 | -3.11715 | H                             | -2.79456 | -1.22941 | -3.08695 |
| C                             | -1.39147 | -1.2748  | -1.44831 | C                             | -1.43374 | -1.25321 | -1.42572 |
| H                             | -2.22051 | -0.73251 | -1.90507 | H                             | -2.04904 | -1.89979 | -0.78715 |
| H                             | -1.81062 | -2.01656 | -0.75866 | H                             | -0.67526 | -1.87163 | -1.91209 |
| O                             | -0.66326 | -0.29276 | -0.7032  | O                             | -0.78441 | -0.27334 | -0.61447 |
| C                             | -0.14463 | -0.74237 | 0.485329 | C                             | -0.13384 | -0.7972  | 0.476112 |
| H                             | -0.9014  | -1.17203 | 1.147541 | H                             | -0.80765 | -1.27781 | 1.19113  |
| O                             | 0.456574 | 0.311656 | 1.163113 | O                             | 0.540991 | 0.217967 | 1.145614 |
| C                             | 1.632446 | 0.807852 | 0.603613 | C                             | 1.631533 | 0.764049 | 0.469739 |
| H                             | 2.110175 | -0.28094 | 0.033048 | H                             | 2.015319 | -0.2697  | -0.26165 |
| C                             | 1.484802 | 1.820474 | -0.5019  | C                             | 1.338198 | 1.878762 | -0.49995 |
| H                             | 2.471824 | 2.169901 | -0.80911 | H                             | 2.27346  | 2.251995 | -0.92027 |
| H                             | 0.96461  | 1.394013 | -1.35803 | H                             | 0.684859 | 1.540374 | -1.30233 |
| H                             | 0.909284 | 2.677549 | -0.13842 | H                             | 0.842112 | 2.699691 | 0.027453 |
| H                             | 2.306049 | 1.083559 | 1.414077 | H                             | 2.420629 | 0.961344 | 1.194568 |
| O                             | 0.799336 | -1.78274 | 0.335698 | O                             | 0.788914 | -1.80979 | 0.140059 |
| O                             | 1.833158 | -1.35608 | -0.48935 | O                             | 1.680388 | -1.3155  | -0.80481 |
| E <sub>0K</sub> =-496.6268602 |          |          |          | E <sub>0K</sub> =-496.6288494 |          |          |          |

| Structure 5                   |          |          |          |
|-------------------------------|----------|----------|----------|
| C                             | -2.30028 | -2.18937 | -0.74621 |
| H                             | -3.05794 | -1.62904 | -0.19429 |
| H                             | -1.79292 | -2.87342 | -0.06315 |
| H                             | -2.80397 | -2.79433 | -1.5023  |
| C                             | -1.32233 | -1.24542 | -1.42625 |
| H                             | -0.5099  | -1.79623 | -1.90641 |
| H                             | -1.82986 | -0.64578 | -2.18116 |
| O                             | -0.76063 | -0.27745 | -0.53401 |
| C                             | -0.08267 | -0.79372 | 0.545406 |
| H                             | -0.72804 | -1.26994 | 1.286308 |
| O                             | 0.597907 | 0.23303  | 1.193351 |
| C                             | 1.665189 | 0.787707 | 0.489038 |
| H                             | 2.04432  | -0.24536 | -0.24099 |
| C                             | 1.339831 | 1.894089 | -0.48009 |
| H                             | 2.2626   | 2.277587 | -0.91842 |
| H                             | 0.676187 | 1.544791 | -1.2689  |
| H                             | 0.842957 | 2.710542 | 0.053492 |
| H                             | 2.46822  | 0.998247 | 1.194696 |
| O                             | 0.840931 | -1.79981 | 0.193291 |
| O                             | 1.711092 | -1.30225 | -0.77052 |
| E <sub>0K</sub> =-496.6266106 |          |          |          |

**Table S49.** Cartesian coordinates of the transition state 3 (TS3) within chair-eq1-eq2

structures.

| Structure 1           |          |          |          | Structure 2           |          |          |          |
|-----------------------|----------|----------|----------|-----------------------|----------|----------|----------|
| C                     | -3.46314 | -0.6204  | -0.19588 | C                     | -2.04717 | -2.03735 | -0.20778 |
| H                     | -3.93739 | -1.13108 | -1.03576 | H                     | -2.48782 | -2.54527 | -1.06864 |
| H                     | -3.94754 | 0.346811 | -0.0566  | H                     | -2.72    | -2.15197 | 0.643533 |
| H                     | -3.6119  | -1.21747 | 0.704857 | H                     | -1.09386 | -2.50928 | 0.031205 |
| C                     | -1.98788 | -0.4382  | -0.47066 | C                     | -1.84403 | -0.56904 | -0.52178 |
| H                     | -1.81869 | 0.174041 | -1.35874 | H                     | -2.78636 | -0.08188 | -0.77331 |
| H                     | -1.48167 | -1.39689 | -0.59842 | H                     | -1.14964 | -0.42627 | -1.35038 |
| O                     | -1.43278 | 0.232471 | 0.676355 | O                     | -1.35478 | 0.12256  | 0.646019 |
| C                     | -0.11593 | 0.518136 | 0.623108 | C                     | -0.05568 | 0.475136 | 0.637007 |
| H                     | 0.195583 | 1.013519 | 1.547091 | H                     | 0.220684 | 0.918483 | 1.597577 |
| O                     | 0.637617 | -0.661   | 0.404423 | O                     | 0.758963 | -0.64775 | 0.342081 |
| C                     | 2.002629 | -0.44882 | 0.368435 | C                     | 2.113142 | -0.36924 | 0.329695 |
| H                     | 2.050828 | 0.750274 | -0.20678 | H                     | 2.105668 | 0.868872 | -0.1583  |
| C                     | 2.719135 | -1.51128 | -0.40794 | C                     | 2.880975 | -1.33846 | -0.51655 |
| H                     | 2.325728 | -1.5687  | -1.42362 | H                     | 2.491567 | -1.34349 | -1.53542 |
| H                     | 3.786969 | -1.29527 | -0.44935 | H                     | 3.937033 | -1.06843 | -0.53856 |
| H                     | 2.581326 | -2.48671 | 0.069423 | H                     | 2.791265 | -2.3508  | -0.10964 |
| H                     | 2.414692 | -0.19888 | 1.353439 | H                     | 2.509732 | -0.17245 | 1.332778 |
| O                     | 0.151877 | 1.365619 | -0.47871 | O                     | 0.180842 | 1.411925 | -0.39954 |
| O                     | 1.457353 | 1.813302 | -0.35815 | O                     | 1.463615 | 1.909163 | -0.23667 |
| $E_{0K}=-496.6296726$ |          |          |          | $E_{0K}=-496.6285314$ |          |          |          |

| Structure 3 |          |          |          | Structure 4 |          |          |          |
|-------------|----------|----------|----------|-------------|----------|----------|----------|
| C           | -2.69644 | 0.685469 | -1.37912 | C           | -3.70905 | 0.774247 | 0.88237  |
| H           | -3.18803 | 0.208444 | -2.2301  | H           | -4.41128 | 1.571339 | 1.131908 |
| H           | -2.01003 | 1.446789 | -1.75    | H           | -3.8068  | -0.02396 | 1.61911  |
| H           | -3.4582  | 1.167389 | -0.7644  | H           | -3.9669  | 0.375502 | -0.09922 |
| C           | -1.94944 | -0.35499 | -0.56841 | C           | -2.29685 | 1.3134   | 0.871869 |
| H           | -1.15721 | -0.82884 | -1.14932 | H           | -2.01695 | 1.711021 | 1.855026 |
| H           | -2.62289 | -1.13152 | -0.20489 | H           | -2.1777  | 2.106593 | 0.129435 |
| O           | -1.38511 | 0.240669 | 0.617907 | O           | -1.42611 | 0.226234 | 0.545324 |
| C           | -0.06738 | 0.516019 | 0.589314 | C           | -0.11446 | 0.559936 | 0.54792  |
| H           | 0.228317 | 1.027458 | 1.509514 | H           | 0.208182 | 1.117723 | 1.441163 |
| O           | 0.680982 | -0.67542 | 0.41286  | O           | 0.610461 | -0.62513 | 0.405051 |
| C           | 2.048193 | -0.47819 | 0.400527 | C           | 1.978903 | -0.42095 | 0.375774 |
| H           | 2.122181 | 0.701824 | -0.20452 | H           | 2.048121 | 0.753712 | -0.25127 |
| C           | 2.769928 | -1.56875 | -0.33105 | C           | 2.692104 | -1.52288 | -0.34537 |
| H           | 2.398322 | -1.65032 | -1.35329 | H           | 2.305731 | -1.62161 | -1.36031 |
| H           | 3.840702 | -1.36501 | -0.35493 | H           | 3.762403 | -1.31924 | -0.38518 |
| H           | 2.610828 | -2.52911 | 0.169534 | H           | 2.538334 | -2.47442 | 0.173389 |
| H           | 2.442357 | -0.20639 | 1.387145 | H           | 2.381723 | -0.13126 | 1.353743 |

|                       |          |          |          |                       |          |          |          |
|-----------------------|----------|----------|----------|-----------------------|----------|----------|----------|
| O                     | 0.234594 | 1.334401 | -0.5273  | O                     | 0.163261 | 1.357855 | -0.59071 |
| O                     | 1.543925 | 1.769045 | -0.39671 | O                     | 1.465777 | 1.814692 | -0.46267 |
| $E_{0K}=-496.6286764$ |          |          |          | $E_{0K}=-496.6278814$ |          |          |          |

| Structure 5           |          |          |          | Structure 6           |          |          |          |
|-----------------------|----------|----------|----------|-----------------------|----------|----------|----------|
| C                     | 3.191559 | 0.235383 | 0.645081 | C                     | -2.02018 | 2.128972 | 2.099841 |
| H                     | 4.200756 | 0.49196  | 0.315015 | H                     | -2.83686 | 2.840446 | 2.23475  |
| H                     | 3.264803 | -0.36365 | 1.55376  | H                     | -1.09171 | 2.701019 | 2.051442 |
| H                     | 2.648835 | 1.152309 | 0.873312 | H                     | -1.99035 | 1.471714 | 2.971374 |
| C                     | 2.482608 | -0.55456 | -0.4386  | C                     | -2.2615  | 1.328408 | 0.830949 |
| H                     | 3.032069 | -1.46465 | -0.6818  | H                     | -2.19047 | 1.965464 | -0.05345 |
| H                     | 2.376869 | 0.036812 | -1.35454 | H                     | -3.2474  | 0.866622 | 0.848338 |
| O                     | 1.189966 | -0.99616 | -0.00386 | O                     | -1.36895 | 0.216942 | 0.678789 |
| C                     | 0.158244 | -0.21857 | -0.40378 | C                     | -0.05081 | 0.529544 | 0.660488 |
| H                     | 0.140035 | -0.01048 | -1.48491 | H                     | 0.326313 | 1.004018 | 1.577466 |
| O                     | -1.01418 | -0.85738 | 0.004441 | O                     | 0.638935 | -0.65846 | 0.403793 |
| C                     | -2.1583  | -0.15958 | -0.34002 | C                     | 2.009978 | -0.47962 | 0.364535 |
| H                     | -1.73692 | 1.097266 | -0.21646 | H                     | 2.090991 | 0.735361 | -0.17667 |
| C                     | -3.30704 | -0.49258 | 0.561465 | C                     | 2.688056 | -1.53902 | -0.44848 |
| H                     | -3.04355 | -0.28831 | 1.59972  | H                     | 2.280966 | -1.55689 | -1.45993 |
| H                     | -4.18457 | 0.094629 | 0.289987 | H                     | 3.761196 | -1.35248 | -0.49496 |
| H                     | -3.5586  | -1.55432 | 0.474864 | H                     | 2.525376 | -2.52268 | 0.003234 |
| H                     | -2.35624 | -0.1824  | -1.4184  | H                     | 2.436581 | -0.26934 | 1.352754 |
| O                     | 0.211152 | 1.027742 | 0.275088 | O                     | 0.211007 | 1.405036 | -0.42337 |
| O                     | -0.76018 | 1.842073 | -0.28759 | O                     | 1.526608 | 1.823751 | -0.3     |
| $E_{0K}=-496.6264051$ |          |          |          | $E_{0K}=-496.6252465$ |          |          |          |

| Structure 7 |          |          |          | Structure 8 |          |          |          |
|-------------|----------|----------|----------|-------------|----------|----------|----------|
| C           | -3.36387 | -0.78808 | 1.60036  | C           | -1.48482 | -0.05177 | 3.095944 |
| H           | -3.73895 | -1.3917  | 2.428494 | H           | -1.95391 | -0.69434 | 3.843295 |
| H           | -3.61998 | -1.28231 | 0.662686 | H           | -1.85553 | 0.96565  | 3.234667 |
| H           | -3.85309 | 0.186207 | 1.624971 | H           | -0.40854 | -0.06514 | 3.280606 |
| C           | -1.86463 | -0.62895 | 1.712442 | C           | -1.82819 | -0.56369 | 1.706939 |
| H           | -1.35675 | -1.59649 | 1.679702 | H           | -2.90691 | -0.64264 | 1.581522 |
| H           | -1.58908 | -0.12096 | 2.645256 | H           | -1.3839  | -1.54543 | 1.528049 |
| O           | -1.43306 | 0.164306 | 0.605676 | O           | -1.42629 | 0.327352 | 0.662304 |
| C           | -0.11617 | 0.474236 | 0.634958 | C           | -0.10105 | 0.604843 | 0.607008 |
| H           | 0.211703 | 0.961457 | 1.566026 | H           | 0.28297  | 1.197845 | 1.448646 |
| O           | 0.654537 | -0.69675 | 0.418654 | O           | 0.641623 | -0.59869 | 0.501623 |
| C           | 2.014575 | -0.45296 | 0.377165 | C           | 2.002218 | -0.3825  | 0.379483 |
| H           | 2.030272 | 0.751541 | -0.18902 | H           | 2.009498 | 0.750068 | -0.32493 |
| C           | 2.748789 | -1.4909  | -0.41544 | C           | 2.69285  | -1.51681 | -0.31378 |
| H           | 2.342796 | -1.55053 | -1.42577 | H           | 2.247802 | -1.68602 | -1.29485 |



|                       |          |          |          |                       |          |          |          |
|-----------------------|----------|----------|----------|-----------------------|----------|----------|----------|
| H                     | 3.810419 | -1.24822 | -0.46765 | H                     | 3.7544   | -1.29874 | -0.43307 |
| H                     | 2.640692 | -2.47326 | 0.055454 | H                     | 2.591991 | -2.43656 | 0.271392 |
| H                     | 2.430486 | -0.19986 | 1.360071 | H                     | 2.458763 | -0.02334 | 1.30993  |
| O                     | 0.113115 | 1.326455 | -0.45105 | O                     | 0.093002 | 1.314974 | -0.58419 |
| O                     | 1.408391 | 1.803944 | -0.32465 | O                     | 1.396082 | 1.786474 | -0.56369 |
| $E_{0K}=-496.6266108$ |          |          |          | $E_{0K}=-496.6241996$ |          |          |          |

| Structure 9           |          |          |          |
|-----------------------|----------|----------|----------|
| C                     | -1.56115 | -1.96895 | 1.867543 |
| H                     | -2.16831 | -2.38811 | 2.672613 |
| H                     | -0.51746 | -1.97315 | 2.187385 |
| H                     | -1.64923 | -2.60776 | 0.987865 |
| C                     | -2.04005 | -0.56468 | 1.545295 |
| H                     | -1.9192  | 0.104384 | 2.405163 |
| H                     | -3.09225 | -0.56694 | 1.264727 |
| O                     | -1.37271 | 0.000742 | 0.41605  |
| C                     | -0.06524 | 0.288925 | 0.603224 |
| H                     | 0.203845 | 0.511294 | 1.646977 |
| O                     | 0.72655  | -0.78261 | 0.120495 |
| C                     | 2.085689 | -0.55036 | 0.212752 |
| H                     | 2.126651 | 0.759141 | -0.01453 |
| C                     | 2.86287  | -1.35426 | -0.78471 |
| H                     | 2.508877 | -1.14505 | -1.79468 |
| H                     | 3.925071 | -1.1173  | -0.71901 |
| H                     | 2.733516 | -2.42402 | -0.59162 |
| H                     | 2.450113 | -0.56812 | 1.247604 |
| O                     | 0.221816 | 1.404879 | -0.19938 |
| O                     | 1.509391 | 1.814024 | 0.110601 |
| $E_{0K}=-496.6246415$ |          |          |          |

**Table S50.** Cartesian coordinates of the transition state 3 (TS3) within boat-eq1 structures.

| Structure 1 |          |          | Structure 2 |          |          |
|-------------|----------|----------|-------------|----------|----------|
| C           | -3.34301 | -0.33988 | C           | -3.04654 | -1.54567 |
| H           | -3.00047 | -0.06978 | H           | -3.61053 | -0.68231 |
| H           | -3.78283 | 0.543831 | H           | -2.50002 | -1.97292 |
| H           | -4.11786 | -1.10202 | H           | -3.74699 | -2.29237 |
| C           | -2.20967 | -0.87123 | C           | -2.0869  | -1.13371 |
| H           | -2.57272 | -1.14154 | H           | -1.50171 | -1.98599 |
| H           | -1.74488 | -1.75887 | H           | -2.62336 | -0.6981  |
| O           | -1.20903 | 0.124575 | O           | -1.20465 | -0.15363 |
| C           | -0.28308 | 0.224261 | C           | -0.29744 | 0.326029 |
| H           | -0.71173 | 0.173532 | H           | -0.74754 | 0.599859 |
| O           | 0.672631 | -0.82311 | O           | 0.707662 | -0.62513 |

|                      |          |          |          |                       |          |          |          |
|----------------------|----------|----------|----------|-----------------------|----------|----------|----------|
| C                    | 1.873213 | -0.49375 | 0.343012 | C                     | 1.913814 | -0.44582 | 0.26887  |
| H                    | 2.123012 | 0.630669 | -0.28327 | H                     | 2.082942 | 0.837621 | 0.059145 |
| C                    | 2.911907 | -1.54612 | 0.1121   | C                     | 2.993734 | -1.29313 | -0.32733 |
| H                    | 3.02712  | -1.73911 | -0.95529 | H                     | 3.075857 | -1.10614 | -1.39883 |
| H                    | 3.869458 | -1.23002 | 0.526231 | H                     | 3.950042 | -1.07879 | 0.150024 |
| H                    | 2.615703 | -2.48106 | 0.598069 | H                     | 2.764158 | -2.35353 | -0.18273 |
| H                    | 1.754577 | -0.11948 | 1.365654 | H                     | 1.81809  | -0.44693 | 1.360097 |
| O                    | 0.327272 | 1.465164 | -0.0731  | O                     | 0.256867 | 1.440094 | 0.573511 |
| O                    | 1.477177 | 1.550302 | -0.83862 | O                     | 1.373875 | 1.851553 | -0.13266 |
| $E_{0K}=-496.621214$ |          |          |          | $E_{0K}=-496.6232201$ |          |          |          |

| Structure 3           |          |          |          | Structure 4           |          |          |          |
|-----------------------|----------|----------|----------|-----------------------|----------|----------|----------|
| C                     | -1.87811 | -2.12477 | -0.5996  | C                     | -1.75809 | 2.059973 | 2.389066 |
| H                     | -1.40093 | -2.78879 | 0.122755 | H                     | -0.93317 | 2.714069 | 2.108117 |
| H                     | -1.18067 | -1.96038 | -1.42263 | H                     | -1.49579 | 1.546553 | 3.315265 |
| H                     | -2.76981 | -2.61677 | -0.99392 | H                     | -2.64763 | 2.667948 | 2.569355 |
| C                     | -2.26958 | -0.81795 | 0.06794  | C                     | -2.04581 | 1.044275 | 1.298225 |
| H                     | -2.72017 | -0.12575 | -0.65298 | H                     | -2.89155 | 0.412052 | 1.570454 |
| H                     | -2.99069 | -0.9881  | 0.866399 | H                     | -2.28305 | 1.539233 | 0.349504 |
| O                     | -1.17052 | -0.17128 | 0.70975  | O                     | -0.95279 | 0.141535 | 1.098552 |
| C                     | -0.23145 | 0.345309 | -0.13409 | C                     | -0.06346 | 0.505818 | 0.131572 |
| H                     | -0.64369 | 0.643872 | -1.10453 | H                     | -0.54708 | 0.833203 | -0.7964  |
| O                     | 0.804453 | -0.57673 | -0.43005 | O                     | 0.744624 | -0.59431 | -0.18589 |
| C                     | 1.970555 | -0.41246 | 0.296943 | C                     | 2.057852 | -0.52891 | 0.248492 |
| H                     | 2.139961 | 0.876934 | 0.139954 | H                     | 2.35263  | 0.702635 | -0.08872 |
| C                     | 3.088603 | -1.23218 | -0.26708 | C                     | 2.906469 | -1.55461 | -0.43466 |
| H                     | 3.228859 | -1.00729 | -1.32521 | H                     | 2.831724 | -1.45099 | -1.51791 |
| H                     | 4.015122 | -1.02862 | 0.270014 | H                     | 3.948105 | -1.44544 | -0.13243 |
| H                     | 2.859565 | -2.29824 | -0.17196 | H                     | 2.569357 | -2.56006 | -0.16428 |
| H                     | 1.814446 | -0.45387 | 1.380387 | H                     | 2.148851 | -0.44751 | 1.336765 |
| O                     | 0.281514 | 1.449266 | 0.568442 | O                     | 0.725364 | 1.562098 | 0.651954 |
| O                     | 1.431624 | 1.890421 | -0.06293 | O                     | 1.768219 | 1.803636 | -0.22878 |
| $E_{0K}=-496.6217755$ |          |          |          | $E_{0K}=-496.6226629$ |          |          |          |

| Structure 5 |          |          |          | Structure 6 |          |          |          |
|-------------|----------|----------|----------|-------------|----------|----------|----------|
| C           | -3.31748 | 0.560485 | 1.820139 | C           | -2.7096  | 1.954667 | 0.020107 |
| H           | -2.93769 | 0.282981 | 2.804089 | H           | -3.14315 | 1.177592 | -0.61237 |
| H           | -3.69973 | -0.33527 | 1.329224 | H           | -2.05414 | 2.581634 | -0.58672 |
| H           | -4.13795 | 1.268232 | 1.949803 | H           | -3.51774 | 2.588749 | 0.389563 |
| C           | -2.21774 | 1.187158 | 0.993011 | C           | -1.98128 | 1.334934 | 1.202142 |
| H           | -2.58109 | 1.462808 | -0.00475 | H           | -1.45482 | 2.095162 | 1.784257 |
| H           | -1.81854 | 2.083571 | 1.47462  | H           | -2.68518 | 0.825686 | 1.858895 |
| O           | -1.17595 | 0.217003 | 0.855553 | O           | -1.05958 | 0.304525 | 0.824012 |

|                       |          |          |          |                       |          |          |          |
|-----------------------|----------|----------|----------|-----------------------|----------|----------|----------|
| C                     | -0.17586 | 0.597699 | 0.00837  | C                     | -0.02518 | 0.70439  | 0.025499 |
| H                     | -0.54642 | 0.962873 | -0.95719 | H                     | -0.34164 | 1.165582 | -0.91486 |
| O                     | 0.651925 | -0.50189 | -0.25104 | O                     | 0.741038 | -0.41903 | -0.31355 |
| C                     | 1.901231 | -0.47302 | 0.346272 | C                     | 1.960359 | -0.5292  | 0.332059 |
| H                     | 2.248272 | 0.767767 | 0.095381 | H                     | 2.401501 | 0.699076 | 0.195292 |
| C                     | 2.817803 | -1.48535 | -0.26504 | C                     | 2.830505 | -1.55504 | -0.32316 |
| H                     | 2.880467 | -1.33999 | -1.34426 | H                     | 2.949367 | -1.33212 | -1.38426 |
| H                     | 3.814476 | -1.40343 | 0.168766 | H                     | 3.810901 | -1.57884 | 0.152754 |
| H                     | 2.439139 | -2.49507 | -0.07849 | H                     | 2.375213 | -2.54602 | -0.23185 |
| H                     | 1.855939 | -0.43259 | 1.439652 | H                     | 1.86973  | -0.57052 | 1.422692 |
| O                     | 0.551408 | 1.623361 | 0.659018 | O                     | 0.74645  | 1.625648 | 0.774838 |
| O                     | 1.698119 | 1.880091 | -0.07418 | O                     | 1.931864 | 1.859418 | 0.098153 |
| $E_{0K}=-496.6239521$ |          |          |          | $E_{0K}=-496.6209523$ |          |          |          |

| Structure 7           |          |          |          | Structure 8           |          |          |          |
|-----------------------|----------|----------|----------|-----------------------|----------|----------|----------|
| C                     | -0.97791 | -2.17936 | 1.983876 | C                     | -1.94857 | -0.53488 | 3.07094  |
| H                     | -0.21529 | -2.60963 | 1.334178 | H                     | -2.56013 | -1.3215  | 2.627231 |
| H                     | -1.95724 | -2.51896 | 1.643354 | H                     | -2.54493 | 0.375998 | 3.133664 |
| H                     | -0.82202 | -2.53856 | 3.003685 | H                     | -1.66567 | -0.83832 | 4.080359 |
| C                     | -0.91112 | -0.66515 | 1.949529 | C                     | -0.71104 | -0.29685 | 2.234986 |
| H                     | -1.66646 | -0.22076 | 2.598223 | H                     | -0.09543 | 0.502101 | 2.656038 |
| H                     | 0.06407  | -0.29531 | 2.273008 | H                     | -0.10996 | -1.20706 | 2.152842 |
| O                     | -1.20398 | -0.1823  | 0.627511 | O                     | -1.15546 | 0.083742 | 0.925509 |
| C                     | -0.14941 | 0.243838 | -0.10577 | C                     | -0.18088 | 0.357953 | 0.021002 |
| H                     | -0.48348 | 0.448658 | -1.12274 | H                     | -0.64288 | 0.534438 | -0.95003 |
| O                     | 0.883452 | -0.74161 | -0.17954 | O                     | 0.733123 | -0.72242 | -0.13969 |
| C                     | 2.157715 | -0.37893 | 0.224566 | C                     | 2.052655 | -0.49468 | 0.210769 |
| H                     | 2.185573 | 0.888353 | -0.1113  | H                     | 2.212946 | 0.731712 | -0.22194 |
| C                     | 3.21032  | -1.18509 | -0.47229 | C                     | 2.973167 | -1.4743  | -0.44865 |
| H                     | 3.108732 | -1.08882 | -1.55408 | H                     | 2.843434 | -1.4473  | -1.53132 |
| H                     | 4.204201 | -0.85264 | -0.17142 | H                     | 4.010155 | -1.24415 | -0.20312 |
| H                     | 3.106185 | -2.24383 | -0.21455 | H                     | 2.751981 | -2.48979 | -0.10533 |
| H                     | 2.256504 | -0.28128 | 1.312259 | H                     | 2.195259 | -0.32814 | 1.285333 |
| O                     | 0.36709  | 1.415454 | 0.483987 | O                     | 0.515309 | 1.504878 | 0.457797 |
| O                     | 1.429316 | 1.850167 | -0.29179 | O                     | 1.544166 | 1.757833 | -0.43341 |
| $E_{0K}=-496.6234072$ |          |          |          | $E_{0K}=-496.6250541$ |          |          |          |

**Table S51.** Cartesian coordinates of the transition state 3 (TS3) within boat-ax1 structures.

| Structure 1 |          |          |          | Structure 2 |          |          |          |
|-------------|----------|----------|----------|-------------|----------|----------|----------|
| C           | 3.305126 | 0.220239 | 0.096054 | C           | 2.877772 | -1.85547 | -0.85221 |
| H           | 3.030966 | 1.066919 | 0.728298 | H           | 3.274774 | -1.24502 | -1.66406 |
| H           | 3.558678 | 0.598303 | -0.89502 | H           | 2.246208 | -2.63471 | -1.28048 |
| H           | 4.191286 | -0.24802 | 0.529515 | H           | 3.710165 | -2.32852 | -0.32854 |

|                       |          |          |          |                       |          |          |          |
|-----------------------|----------|----------|----------|-----------------------|----------|----------|----------|
| C                     | 2.1807   | -0.79562 | -0.00456 | C                     | 2.079131 | -1.00155 | 0.106567 |
| H                     | 2.475196 | -1.63465 | -0.63411 | H                     | 1.660874 | -1.60156 | 0.920368 |
| H                     | 1.901519 | -1.194   | 0.975713 | H                     | 2.701159 | -0.21038 | 0.5426   |
| O                     | 1.023826 | -0.24454 | -0.64101 | O                     | 1.013902 | -0.4039  | -0.63215 |
| C                     | 0.200503 | 0.444406 | 0.204367 | C                     | 0.213544 | 0.405356 | 0.123214 |
| H                     | 0.734925 | 1.085892 | 0.912482 | H                     | 0.779188 | 1.102254 | 0.752133 |
| O                     | -0.5892  | -0.41634 | 1.011015 | O                     | -0.60802 | -0.32612 | 1.020241 |
| C                     | -1.90214 | -0.60357 | 0.606764 | C                     | -1.93353 | -0.49045 | 0.647265 |
| H                     | -2.21906 | 0.653279 | 0.356144 | H                     | -2.19094 | 0.743362 | 0.252574 |
| C                     | -2.11586 | -1.38412 | -0.66183 | C                     | -2.19887 | -1.40084 | -0.52102 |
| H                     | -1.68908 | -2.38629 | -0.54933 | H                     | -1.82054 | -2.40343 | -0.29509 |
| H                     | -3.18299 | -1.47757 | -0.86705 | H                     | -3.27135 | -1.46464 | -0.70896 |
| H                     | -1.62548 | -0.901   | -1.50809 | H                     | -1.69478 | -1.04331 | -1.42005 |
| H                     | -2.48812 | -0.90631 | 1.472921 | H                     | -2.52472 | -0.66057 | 1.545484 |
| O                     | -0.60367 | 1.19968  | -0.66294 | O                     | -0.56099 | 1.085197 | -0.82874 |
| O                     | -1.66972 | 1.720016 | 0.04885  | O                     | -1.59559 | 1.736971 | -0.18178 |
| $E_{0K}=-496.6204918$ |          |          |          | $E_{0K}=-496.6225597$ |          |          |          |

| Structure 3           |          |          |          | Structure 4           |          |          |          |
|-----------------------|----------|----------|----------|-----------------------|----------|----------|----------|
| C                     | 2.06279  | -1.53383 | 1.361058 | C                     | 1.172034 | 1.208235 | -2.96419 |
| H                     | 1.541694 | -2.45588 | 1.098408 | H                     | 0.55662  | 2.031235 | -2.59877 |
| H                     | 1.491005 | -1.03157 | 2.142927 | H                     | 0.564003 | 0.602122 | -3.63731 |
| H                     | 3.047522 | -1.78792 | 1.759128 | H                     | 2.010996 | 1.624241 | -3.52634 |
| C                     | 2.219871 | -0.65325 | 0.13369  | C                     | 1.697759 | 0.355785 | -1.82296 |
| H                     | 2.709488 | 0.294366 | 0.387019 | H                     | 2.345033 | -0.43714 | -2.19576 |
| H                     | 2.820653 | -1.14877 | -0.62797 | H                     | 2.27513  | 0.958482 | -1.112   |
| O                     | 0.977104 | -0.37788 | -0.51257 | O                     | 0.664933 | -0.3329  | -1.11345 |
| C                     | 0.142108 | 0.459298 | 0.170184 | C                     | -0.11682 | 0.447328 | -0.31438 |
| H                     | 0.678964 | 1.179689 | 0.797706 | H                     | 0.415587 | 1.319411 | 0.08469  |
| O                     | -0.73275 | -0.22708 | 1.050103 | O                     | -0.56466 | -0.30443 | 0.785889 |
| C                     | -2.02656 | -0.4356  | 0.59724  | C                     | -1.91411 | -0.6215  | 0.835821 |
| H                     | -2.27735 | 0.774827 | 0.135556 | H                     | -2.4311  | 0.519209 | 0.419532 |
| C                     | -2.19403 | -1.40253 | -0.54342 | C                     | -2.38088 | -1.6945  | -0.10891 |
| H                     | -1.81155 | -2.38491 | -0.24701 | H                     | -1.83358 | -2.62042 | 0.095295 |
| H                     | -3.2497  | -1.49869 | -0.80004 | H                     | -3.44756 | -1.87733 | 0.027094 |
| H                     | -1.63644 | -1.07438 | -1.42187 | H                     | -2.19105 | -1.4106  | -1.14508 |
| H                     | -2.67284 | -0.58009 | 1.461318 | H                     | -2.2018  | -0.72955 | 1.880289 |
| O                     | -0.58322 | 1.105269 | -0.84752 | O                     | -1.21492 | 0.87555  | -1.09923 |
| O                     | -1.66585 | 1.762894 | -0.2916  | O                     | -2.13436 | 1.499699 | -0.27167 |
| $E_{0K}=-496.6211073$ |          |          |          | $E_{0K}=-496.6219042$ |          |          |          |

| Structure 5 |          |          | Structure 6 |   |          |         |          |
|-------------|----------|----------|-------------|---|----------|---------|----------|
| C           | 2.848393 | -0.09853 | -2.27775    | C | 2.628454 | 1.84081 | -0.67575 |

|                       |          |          |          |                       |          |          |          |
|-----------------------|----------|----------|----------|-----------------------|----------|----------|----------|
| H                     | 2.344151 | -0.77486 | -2.96894 | H                     | 3.299183 | 1.017578 | -0.42668 |
| H                     | 3.412771 | -0.6932  | -1.5585  | H                     | 2.058871 | 2.10607  | 0.21723  |
| H                     | 3.544205 | 0.523237 | -2.84353 | H                     | 3.228816 | 2.70793  | -0.95843 |
| C                     | 1.837333 | 0.770809 | -1.56485 | C                     | 1.718783 | 1.445559 | -1.82539 |
| H                     | 2.328976 | 1.451482 | -0.85901 | H                     | 1.030448 | 2.250406 | -2.09786 |
| H                     | 1.256243 | 1.368061 | -2.27265 | H                     | 2.300342 | 1.188521 | -2.70961 |
| O                     | 0.959873 | -0.09482 | -0.83938 | O                     | 0.971523 | 0.261476 | -1.52016 |
| C                     | 0.067561 | 0.56467  | -0.04431 | C                     | -0.17921 | 0.493672 | -0.84666 |
| H                     | 0.532997 | 1.353299 | 0.559553 | H                     | -0.10004 | 1.235964 | -0.03818 |
| O                     | -0.52497 | -0.34637 | 0.841079 | O                     | -0.62239 | -0.73587 | -0.35433 |
| C                     | -1.86703 | -0.63957 | 0.644953 | C                     | -1.81898 | -0.64458 | 0.33506  |
| H                     | -2.32217 | 0.566973 | 0.350069 | H                     | -2.43195 | 0.326375 | -0.34328 |
| C                     | -2.19065 | -1.5338  | -0.51999 | C                     | -2.56842 | -1.94124 | 0.325853 |
| H                     | -1.67331 | -2.49072 | -0.39648 | H                     | -1.9854  | -2.71755 | 0.831469 |
| H                     | -3.26499 | -1.71645 | -0.56607 | H                     | -3.52175 | -1.83184 | 0.843364 |
| H                     | -1.85827 | -1.08791 | -1.45848 | H                     | -2.74973 | -2.26472 | -0.69963 |
| H                     | -2.30117 | -0.91079 | 1.605737 | H                     | -1.70739 | -0.14779 | 1.306357 |
| O                     | -0.90345 | 1.136089 | -0.90156 | O                     | -1.15947 | 0.953086 | -1.76375 |
| O                     | -1.9352  | 1.638238 | -0.12659 | O                     | -2.26495 | 1.336977 | -1.02033 |
| $E_{0K}=-496.6233116$ |          |          |          | $E_{0K}=-496.6259924$ |          |          |          |

**Table S52** . Cartesian coordinates of the transition state 4 (TS4) within chair-eq1 structures.

| Structure 1           |          |          |          | Structure 2           |          |          |          |
|-----------------------|----------|----------|----------|-----------------------|----------|----------|----------|
| C                     | 2.836701 | -0.24147 | -0.93947 | C                     | -3.29778 | -1.33816 | -0.72014 |
| H                     | 2.34895  | -1.21621 | -0.94516 | H                     | -3.84622 | -0.97518 | 0.150337 |
| H                     | 3.655877 | -0.26217 | -0.21878 | H                     | -3.19014 | -2.42029 | -0.63677 |
| H                     | 3.252098 | -0.04493 | -1.93064 | H                     | -3.87711 | -1.11137 | -1.61697 |
| C                     | 1.842132 | 0.840677 | -0.56878 | C                     | -1.94055 | -0.67637 | -0.79963 |
| H                     | 2.310657 | 1.825555 | -0.57005 | H                     | -1.36718 | -1.04652 | -1.65306 |
| H                     | 0.997506 | 0.861442 | -1.25906 | H                     | -2.02779 | 0.409158 | -0.87648 |
| O                     | 1.367562 | 0.641972 | 0.776107 | O                     | -1.24709 | -1.00399 | 0.41544  |
| C                     | 0.109472 | 0.157104 | 0.902859 | C                     | 0.045906 | -0.59924 | 0.490187 |
| H                     | -0.10978 | -0.02564 | 1.95916  | H                     | 0.450019 | -0.84891 | 1.476125 |
| O                     | -0.02626 | -1.00643 | 0.143791 | O                     | 0.127007 | 0.768644 | 0.237983 |
| C                     | -1.20771 | -1.76907 | 0.354209 | C                     | 1.371094 | 1.392441 | 0.526295 |
| H                     | -0.99392 | -2.75939 | -0.05789 | H                     | 1.156687 | 2.46372  | 0.576968 |
| C                     | -2.40646 | -1.1552  | -0.31444 | C                     | 2.408127 | 1.100451 | -0.52288 |
| H                     | -2.26679 | -0.87807 | -1.35765 | H                     | 2.087725 | 1.260378 | -1.55063 |
| H                     | -3.36509 | -1.61421 | -0.08283 | H                     | 3.418378 | 1.434154 | -0.29625 |
| H                     | -2.45872 | 0.056609 | 0.290656 | H                     | 2.479035 | -0.25164 | -0.4632  |
| H                     | -1.38776 | -1.88619 | 1.430352 | H                     | 1.726532 | 1.075094 | 1.514934 |
| O                     | -0.79198 | 1.16925  | 0.438883 | O                     | 0.789671 | -1.33942 | -0.48415 |
| O                     | -2.05221 | 0.917673 | 0.955011 | O                     | 2.129904 | -1.31099 | -0.1371  |
| $E_{0K}=-496.6187812$ |          |          |          | $E_{0K}=-496.6200937$ |          |          |          |

| Structure 3           |          |          |          | Structure 4           |          |          |          |
|-----------------------|----------|----------|----------|-----------------------|----------|----------|----------|
| C                     | -1.60076 | -0.4806  | -1.97477 | C                     | -1.9799  | -0.56601 | 2.781955 |
| H                     | -1.52065 | -1.55629 | -2.13774 | H                     | -0.99423 | -0.1999  | 3.078171 |
| H                     | -0.63323 | -0.02678 | -2.18983 | H                     | -1.99567 | -1.65386 | 2.873577 |
| H                     | -2.33923 | -0.07228 | -2.66879 | H                     | -2.70917 | -0.15042 | 3.479892 |
| C                     | -2.0403  | -0.18749 | -0.55173 | C                     | -2.33394 | -0.14011 | 1.366568 |
| H                     | -2.05315 | 0.886297 | -0.35648 | H                     | -3.35417 | -0.43227 | 1.12118  |
| H                     | -3.03674 | -0.5867  | -0.36537 | H                     | -2.24215 | 0.941467 | 1.249408 |
| O                     | -1.23581 | -0.83427 | 0.446074 | O                     | -1.54192 | -0.79118 | 0.372091 |
| C                     | 0.07675  | -0.49426 | 0.530614 | C                     | -0.19465 | -0.60499 | 0.47197  |
| H                     | 0.469718 | -0.79209 | 1.508149 | H                     | 0.273708 | -1.12626 | 1.31972  |
| O                     | 0.234546 | 0.870879 | 0.313738 | O                     | 0.077302 | 0.761646 | 0.546933 |
| C                     | 1.508121 | 1.417641 | 0.632343 | C                     | 1.425559 | 1.107007 | 0.834087 |
| H                     | 1.352913 | 2.498044 | 0.70105  | H                     | 1.403061 | 2.156839 | 1.139841 |
| C                     | 2.542477 | 1.086666 | -0.4075  | C                     | 2.321123 | 0.913462 | -0.359   |
| H                     | 2.245492 | 1.279856 | -1.43674 | H                     | 1.961166 | 1.359667 | -1.2841  |
| H                     | 3.56533  | 1.363948 | -0.16241 | H                     | 3.387148 | 1.026615 | -0.17436 |
| H                     | 2.540873 | -0.27122 | -0.37156 | H                     | 2.162766 | -0.40625 | -0.62035 |
| H                     | 1.828634 | 1.061247 | 1.61934  | H                     | 1.789369 | 0.516969 | 1.685771 |
| O                     | 0.791979 | -1.25255 | -0.45592 | O                     | 0.310898 | -1.18021 | -0.71813 |
| O                     | 2.124548 | -1.3133  | -0.08034 | O                     | 1.656531 | -1.45093 | -0.52959 |
| $E_{0K}=-496.6182268$ |          |          |          | $E_{0K}=-496.6162763$ |          |          |          |

| Structure 5 |          |          |          | Structure 6 |          |          |          |
|-------------|----------|----------|----------|-------------|----------|----------|----------|
| C           | -3.61764 | 0.156008 | 1.288824 | C           | -1.82962 | 1.255291 | 2.389489 |
| H           | -3.82767 | -0.91172 | 1.360485 | H           | -2.14255 | 2.009131 | 1.666066 |
| H           | -3.96317 | 0.512916 | 0.317904 | H           | -0.7889  | 1.450496 | 2.652969 |
| H           | -4.17205 | 0.677789 | 2.070833 | H           | -2.43731 | 1.353707 | 3.291722 |
| C           | -2.13556 | 0.41622  | 1.440571 | C           | -2.00946 | -0.13631 | 1.807001 |
| H           | -1.90696 | 1.482079 | 1.369057 | H           | -1.63844 | -0.90397 | 2.496948 |
| H           | -1.76672 | 0.047127 | 2.406715 | H           | -3.06202 | -0.33945 | 1.613517 |
| O           | -1.46914 | -0.28157 | 0.390464 | O           | -1.37784 | -0.30421 | 0.53998  |
| C           | -0.11094 | -0.26183 | 0.485504 | C           | -0.01819 | -0.27015 | 0.560824 |
| H           | 0.273937 | -0.71063 | 1.415258 | H           | 0.420403 | -0.6346  | 1.503202 |
| O           | 0.334076 | 1.056285 | 0.37521  | O           | 0.398761 | 1.036273 | 0.305852 |
| C           | 1.716159 | 1.270089 | 0.627553 | C           | 1.789328 | 1.293093 | 0.448529 |
| H           | 1.823755 | 2.34664  | 0.78738  | H           | 1.880749 | 2.380633 | 0.521021 |
| C           | 2.573765 | 0.808413 | -0.51881 | C           | 2.581217 | 0.762864 | -0.71478 |
| H           | 2.263707 | 1.162125 | -1.50024 | H           | 2.19603  | 1.030676 | -1.69675 |
| H           | 3.646999 | 0.81568  | -0.34135 | H           | 3.663421 | 0.80568  | -0.61303 |
| H           | 2.254137 | -0.50402 | -0.59325 | H           | 2.289867 | -0.55658 | -0.65693 |
| H           | 2.011219 | 0.761991 | 1.554949 | H           | 2.157363 | 0.862261 | 1.389411 |

|                               |          |          |          |                               |          |          |          |
|-------------------------------|----------|----------|----------|-------------------------------|----------|----------|----------|
| O                             | 0.320742 | -1.05849 | -0.60034 | O                             | 0.377285 | -1.15942 | -0.47229 |
| O                             | 1.624938 | -1.45572 | -0.35387 | O                             | 1.708179 | -1.49114 | -0.27639 |
| <hr/>                         |          |          |          | <hr/>                         |          |          |          |
| E <sub>0K</sub> =-496.6181978 |          |          |          | E <sub>0K</sub> =-496.6151296 |          |          |          |
| <hr/>                         |          |          |          | <hr/>                         |          |          |          |

| Structure 7                   |          |          |          | Structure 8                   |          |          |          |
|-------------------------------|----------|----------|----------|-------------------------------|----------|----------|----------|
| C                             | -2.21096 | -2.75154 | -0.39177 | C                             | -3.03421 | -2.14718 | 1.628767 |
| H                             | -1.36529 | -2.86161 | -1.07018 | H                             | -3.61094 | -1.84735 | 0.753117 |
| H                             | -3.00203 | -2.20075 | -0.9027  | H                             | -3.27569 | -1.47274 | 2.451182 |
| H                             | -2.58993 | -3.74211 | -0.12988 | H                             | -3.3243  | -3.16143 | 1.908307 |
| C                             | -1.79173 | -2.00934 | 0.862706 | C                             | -1.55464 | -2.09687 | 1.3202   |
| H                             | -2.62892 | -1.90992 | 1.555649 | H                             | -0.95874 | -2.38664 | 2.194923 |
| H                             | -0.98121 | -2.53597 | 1.376923 | H                             | -1.29737 | -2.76134 | 0.491782 |
| O                             | -1.38021 | -0.67235 | 0.556461 | O                             | -1.23782 | -0.75006 | 0.966877 |
| C                             | -0.03591 | -0.46934 | 0.563349 | C                             | 0.083998 | -0.53666 | 0.726562 |
| H                             | 0.461406 | -0.78691 | 1.493741 | H                             | 0.750336 | -0.94969 | 1.501156 |
| O                             | 0.150658 | 0.874454 | 0.325392 | O                             | 0.237612 | 0.827263 | 0.601579 |
| C                             | 1.478448 | 1.350501 | 0.498582 | C                             | 1.57953  | 1.291443 | 0.544826 |
| H                             | 1.390792 | 2.439386 | 0.545073 | H                             | 1.519912 | 2.368589 | 0.723168 |
| C                             | 2.386934 | 0.936649 | -0.62711 | C                             | 2.231218 | 1.006434 | -0.78103 |
| H                             | 1.99732  | 1.120692 | -1.62666 | H                             | 1.646292 | 1.289667 | -1.65416 |
| H                             | 3.4405   | 1.17162  | -0.49164 | H                             | 3.292954 | 1.235695 | -0.84183 |
| H                             | 2.329918 | -0.40903 | -0.56721 | H                             | 2.1699   | -0.34001 | -0.85134 |
| H                             | 1.877872 | 1.005313 | 1.460898 | H                             | 2.163661 | 0.84873  | 1.361989 |
| O                             | 0.523465 | -1.27898 | -0.48309 | O                             | 0.405513 | -1.22106 | -0.49151 |
| O                             | 1.879618 | -1.43898 | -0.24387 | O                             | 1.778558 | -1.39958 | -0.55262 |
| <hr/>                         |          |          |          | <hr/>                         |          |          |          |
| E <sub>0K</sub> =-496.6178425 |          |          |          | E <sub>0K</sub> =-496.6193951 |          |          |          |
| <hr/>                         |          |          |          | <hr/>                         |          |          |          |

| Structure 9 |          |          |          |
|-------------|----------|----------|----------|
| C           | -0.83782 | -2.96438 | 1.807377 |
| H           | -0.89203 | -2.47676 | 2.783173 |
| H           | 0.210289 | -3.10888 | 1.537593 |
| H           | -1.29481 | -3.95202 | 1.892305 |
| C           | -1.58521 | -2.15682 | 0.75876  |
| H           | -1.44805 | -2.59016 | -0.23415 |
| H           | -2.6509  | -2.13049 | 0.982287 |
| O           | -1.21096 | -0.77568 | 0.725811 |
| C           | 0.115856 | -0.52621 | 0.547315 |
| H           | 0.767663 | -0.93195 | 1.334576 |
| O           | 0.233606 | 0.845434 | 0.467766 |
| C           | 1.563405 | 1.343412 | 0.511836 |
| H           | 1.465075 | 2.415091 | 0.705356 |
| C           | 2.309659 | 1.101973 | -0.77265 |
| H           | 1.780385 | 1.398376 | -1.67648 |

|   |          |          |          |
|---|----------|----------|----------|
| H | 3.368454 | 1.351502 | -0.7552  |
| H | 2.280188 | -0.24165 | -0.88704 |
| H | 2.102626 | 0.898864 | 1.358331 |
| O | 0.513296 | -1.16494 | -0.67332 |
| O | 1.889891 | -1.32182 | -0.6617  |

$E_{0K}=-496.616992$

**Table S53.** Cartesian coordinates of the transition state 4 (TS4) within twist-chair structures.

| Structure 1           |          |          |          | Structure 2           |          |          |          |
|-----------------------|----------|----------|----------|-----------------------|----------|----------|----------|
| C                     | 2.766505 | 0.958433 | -0.08679 | C                     | 3.469987 | -1.09757 | -0.59081 |
| H                     | 2.065939 | 1.614496 | 0.429986 | H                     | 3.393914 | -0.48381 | -1.4893  |
| H                     | 2.756833 | 1.196317 | -1.15205 | H                     | 3.40671  | -2.14674 | -0.88164 |
| H                     | 3.770919 | 1.146803 | 0.299165 | H                     | 4.44167  | -0.91908 | -0.12709 |
| C                     | 2.397176 | -0.50037 | 0.120804 | C                     | 2.360123 | -0.7516  | 0.376742 |
| H                     | 3.132227 | -1.15379 | -0.35065 | H                     | 2.424882 | -1.36423 | 1.284523 |
| H                     | 2.358012 | -0.74744 | 1.187567 | H                     | 2.401184 | 0.301776 | 0.670394 |
| O                     | 1.150094 | -0.82725 | -0.4935  | O                     | 1.119979 | -1.01331 | -0.27558 |
| C                     | 0.061116 | -0.74125 | 0.340663 | C                     | 0.023733 | -0.7445  | 0.509811 |
| H                     | 0.173696 | -1.33281 | 1.25492  | H                     | 0.08802  | -1.19681 | 1.505    |
| O                     | -0.22277 | 0.553584 | 0.760091 | O                     | -0.18039 | 0.61457  | 0.718718 |
| C                     | -0.82054 | 1.374589 | -0.24751 | C                     | -0.73431 | 1.302725 | -0.40612 |
| H                     | -0.47186 | 2.394738 | -0.06074 | H                     | -0.33073 | 2.318686 | -0.37399 |
| C                     | -2.3206  | 1.287461 | -0.13288 | C                     | -2.23675 | 1.317137 | -0.29107 |
| H                     | -2.89461 | 1.565259 | -1.01383 | H                     | -2.79447 | 1.499577 | -1.20679 |
| H                     | -2.4803  | -0.04568 | 0.010286 | H                     | -2.47226 | 0.030468 | 0.038655 |
| H                     | -2.73112 | 1.645406 | 0.809355 | H                     | -2.62525 | 1.828327 | 0.587729 |
| H                     | -0.47124 | 1.070598 | -1.23719 | H                     | -0.40442 | 0.833274 | -1.33576 |
| O                     | -0.97026 | -1.265   | -0.47951 | O                     | -1.02579 | -1.32568 | -0.24447 |
| O                     | -2.17088 | -1.16472 | 0.1951   | O                     | -2.22586 | -1.06534 | 0.387922 |
| $E_{0K}=-496.6187711$ |          |          |          | $E_{0K}=-496.6207275$ |          |          |          |

| Structure 3 |          |          |          | Structure 4 |          |          |          |
|-------------|----------|----------|----------|-------------|----------|----------|----------|
| C           | 2.820888 | -1.30013 | 1.505654 | C           | 0.526109 | -0.59586 | -2.93397 |
| H           | 2.955588 | -2.25591 | 0.997797 | H           | -0.54628 | -0.44522 | -2.80715 |
| H           | 2.130733 | -1.44651 | 2.338687 | H           | 0.69659  | -1.65958 | -3.10591 |
| H           | 3.781311 | -0.98463 | 1.918714 | H           | 0.857868 | -0.04265 | -3.81588 |
| C           | 2.310045 | -0.25601 | 0.5272   | C           | 1.314693 | -0.13555 | -1.71846 |
| H           | 2.155805 | 0.713113 | 1.011796 | H           | 2.382227 | -0.27233 | -1.89155 |
| H           | 3.020152 | -0.11447 | -0.28735 | H           | 1.153105 | 0.922939 | -1.49688 |
| O           | 1.097141 | -0.66941 | -0.10439 | O           | 1.048772 | -0.91471 | -0.5509  |
| C           | -0.03263 | -0.40327 | 0.634249 | C           | -0.05602 | -0.62342 | 0.202171 |
| H           | 0.054955 | -0.68235 | 1.688269 | H           | 0.040173 | -1.15453 | 1.148269 |
| O           | -0.38189 | 0.942225 | 0.626155 | O           | -0.20306 | 0.737295 | 0.488693 |



|                       |          |          |          |                       |          |          |          |
|-----------------------|----------|----------|----------|-----------------------|----------|----------|----------|
| C                     | -0.97059 | 1.384835 | -0.59987 | C                     | -1.14786 | 1.485334 | -0.27622 |
| H                     | -0.67335 | 2.429829 | -0.72453 | H                     | -0.80465 | 2.523335 | -0.22306 |
| C                     | -2.46952 | 1.2594   | -0.50519 | C                     | -2.5276  | 1.347029 | 0.304689 |
| H                     | -3.01708 | 1.231353 | -1.44449 | H                     | -3.35153 | 1.682861 | -0.32098 |
| H                     | -2.58225 | 0.026449 | 0.028414 | H                     | -2.63205 | 0.000967 | 0.361405 |
| H                     | -2.93293 | 1.862741 | 0.273154 | H                     | -2.612   | 1.613806 | 1.356226 |
| H                     | -0.56829 | 0.812941 | -1.4391  | H                     | -1.13865 | 1.183354 | -1.32644 |
| O                     | -1.00223 | -1.20425 | -0.01946 | O                     | -1.19766 | -1.1186  | -0.49712 |
| O                     | -2.23653 | -0.9684  | 0.553889 | O                     | -2.27619 | -1.11292 | 0.371438 |
| $E_{0K}=-496.6188506$ |          |          |          | $E_{0K}=-496.6163149$ |          |          |          |

| Structure 5           |          |          |          | Structure 6          |          |          |          |
|-----------------------|----------|----------|----------|----------------------|----------|----------|----------|
| C                     | 2.691678 | -0.2193  | -2.37493 | C                    | 2.743913 | -2.56979 | -0.59747 |
| H                     | 3.488156 | -0.23903 | -1.62995 | H                    | 3.221015 | -2.37553 | 0.363898 |
| H                     | 2.949245 | 0.510066 | -3.14491 | H                    | 3.08874  | -1.82298 | -1.31382 |
| H                     | 2.621754 | -1.20554 | -2.83501 | H                    | 3.049689 | -3.55665 | -0.94915 |
| C                     | 1.376958 | 0.15066  | -1.72425 | C                    | 1.23873  | -2.50895 | -0.46195 |
| H                     | 1.439479 | 1.135642 | -1.25109 | H                    | 0.744235 | -2.69637 | -1.41842 |
| H                     | 0.565628 | 0.156197 | -2.45913 | H                    | 0.878568 | -3.25001 | 0.262709 |
| O                     | 1.11253  | -0.83391 | -0.72333 | O                    | 0.899037 | -1.20196 | 0.003998 |
| C                     | -0.05564 | -0.70987 | -0.02365 | C                    | -0.42242 | -1.04946 | 0.346675 |
| H                     | -0.04474 | -1.44647 | 0.77845  | H                    | -0.78423 | -1.83428 | 1.019827 |
| O                     | -0.23478 | 0.550336 | 0.557858 | O                    | -0.6171  | 0.157916 | 0.972089 |
| C                     | -1.08516 | 1.481938 | -0.11005 | C                    | -0.70035 | 1.281894 | 0.091248 |
| H                     | -0.74639 | 2.469446 | 0.218421 | H                    | -0.29426 | 2.131404 | 0.646789 |
| C                     | -2.52135 | 1.253133 | 0.271593 | C                    | -2.14242 | 1.519476 | -0.2771  |
| H                     | -3.26989 | 1.747462 | -0.34361 | H                    | -2.32544 | 2.119943 | -1.16541 |
| H                     | -2.63334 | -0.0653  | 0.001619 | H                    | -2.53847 | 0.268179 | -0.5854  |
| H                     | -2.72155 | 1.272081 | 1.340995 | H                    | -2.79888 | 1.740115 | 0.562643 |
| H                     | -0.96132 | 1.429362 | -1.19412 | H                    | -0.07599 | 1.121491 | -0.78967 |
| O                     | -1.1153  | -1.00509 | -0.92966 | O                    | -1.13603 | -1.12007 | -0.89427 |
| O                     | -2.28356 | -1.16291 | -0.20521 | O                    | -2.48088 | -0.90724 | -0.65917 |
| $E_{0K}=-496.6184807$ |          |          |          | $E_{0K}=-496.621793$ |          |          |          |

| Structure 7 |          |          |          |
|-------------|----------|----------|----------|
| C           | 0.418116 | -3.07326 | -1.79089 |
| H           | 0.535734 | -2.59881 | -2.76651 |
| H           | -0.63851 | -3.07228 | -1.52431 |
| H           | 0.765215 | -4.10645 | -1.86499 |
| C           | 1.233407 | -2.3276  | -0.75078 |
| H           | 1.110319 | -2.77817 | 0.24007  |
| H           | 2.295057 | -2.34701 | -1.00277 |
| O           | 0.872274 | -0.94369 | -0.69297 |

|   |          |          |          |
|---|----------|----------|----------|
| C | 0.057393 | -0.59109 | 0.35424  |
| H | 0.432778 | -0.9292  | 1.325716 |
| O | -0.07783 | 0.773817 | 0.412859 |
| C | -1.01238 | 1.323128 | -0.5202  |
| H | -0.63683 | 2.318045 | -0.77371 |
| C | -2.36996 | 1.409677 | 0.12894  |
| H | -3.22378 | 1.501501 | -0.5387  |
| H | -2.46615 | 0.188845 | 0.689953 |
| H | -2.41498 | 2.043817 | 1.012499 |
| H | -1.03426 | 0.724616 | -1.43285 |
| O | -1.19853 | -1.23253 | 0.085913 |
| O | -2.10976 | -0.87307 | 1.061885 |

$E_{0K}=-$   
496.6204349

**Table S54.** Cartesian coordinates of the transition state 4 (TS4) within chair-ax structures.

| Structure 1           |          |          |          | Structure 2           |          |          |          |
|-----------------------|----------|----------|----------|-----------------------|----------|----------|----------|
| C                     | -3.16186 | -0.45295 | -0.70314 | C                     | -2.10595 | 1.662539 | -0.68069 |
| H                     | -2.81575 | -0.6156  | -1.72486 | H                     | -1.3836  | 2.389392 | -0.31236 |
| H                     | -3.38008 | -1.42134 | -0.25113 | H                     | -1.87071 | 1.438823 | -1.72226 |
| H                     | -4.08133 | 0.133947 | -0.7379  | H                     | -3.10474 | 2.103477 | -0.63592 |
| C                     | -2.10669 | 0.28121  | 0.09399  | C                     | -2.08521 | 0.386019 | 0.141403 |
| H                     | -1.87688 | 1.254125 | -0.34737 | H                     | -2.24046 | 0.601943 | 1.204932 |
| H                     | -2.43334 | 0.44101  | 1.129344 | H                     | -2.87775 | -0.2896  | -0.18351 |
| O                     | -0.92908 | -0.52391 | 0.093943 | O                     | -0.87587 | -0.35961 | -0.01659 |
| C                     | 0.046946 | -0.10489 | 0.964724 | C                     | 0.096327 | -0.11305 | 0.920279 |
| H                     | -0.2797  | -0.10455 | 2.009991 | H                     | -0.27399 | -0.17766 | 1.948576 |
| O                     | 1.130381 | -0.94895 | 0.886772 | O                     | 1.103522 | -1.04288 | 0.804333 |
| C                     | 1.713766 | -1.14966 | -0.4029  | C                     | 1.735357 | -1.17902 | -0.4708  |
| H                     | 2.339738 | -2.03882 | -0.2917  | H                     | 2.236647 | -2.14965 | -0.43475 |
| C                     | 2.537699 | 0.035409 | -0.82453 | C                     | 2.723252 | -0.07016 | -0.705   |
| H                     | 3.260035 | 0.384212 | -0.08841 | H                     | 3.43421  | 0.096636 | 0.102304 |
| H                     | 2.901749 | 0.01517  | -1.84958 | H                     | 3.14459  | -0.01443 | -1.70647 |
| H                     | 1.637377 | 1.019684 | -0.8177  | H                     | 1.936767 | 1.004956 | -0.6244  |
| H                     | 0.932154 | -1.36746 | -1.13419 | H                     | 0.9801   | -1.20935 | -1.25946 |
| O                     | 0.396637 | 1.267045 | 0.765744 | O                     | 0.577976 | 1.23275  | 0.869728 |
| O                     | 0.604168 | 1.536429 | -0.57963 | O                     | 0.931245 | 1.586813 | -0.42509 |
| $E_{0K}=-496.6218015$ |          |          |          | $E_{0K}=-496.6191118$ |          |          |          |

| Structure 3 |          |          |          | Structure 4 |          |          |          |
|-------------|----------|----------|----------|-------------|----------|----------|----------|
| C           | -2.6755  | 0.505763 | 1.524466 | C           | -2.50158 | -2.22209 | -0.74701 |
| H           | -2.85372 | -0.44881 | 2.024232 | H           | -3.29962 | -1.48242 | -0.67614 |
| H           | -2.04989 | 1.132376 | 2.162931 | H           | -2.1049  | -2.20532 | -1.76312 |

|                       |          |          |          |                       |          |          |          |
|-----------------------|----------|----------|----------|-----------------------|----------|----------|----------|
| H                     | -3.634   | 1.013627 | 1.402423 | H                     | -2.91884 | -3.21133 | -0.55106 |
| C                     | -2.0441  | 0.28894  | 0.159061 | C                     | -1.40558 | -1.91074 | 0.248021 |
| H                     | -2.73044 | -0.24123 | -0.50066 | H                     | -1.79215 | -1.9151  | 1.275284 |
| H                     | -1.78017 | 1.241023 | -0.30761 | H                     | -0.59652 | -2.64664 | 0.191639 |
| O                     | -0.88675 | -0.54888 | 0.199551 | O                     | -0.90073 | -0.61515 | -0.05913 |
| C                     | 0.132391 | -0.13432 | 1.024165 | C                     | 0.025786 | -0.1562  | 0.849961 |
| H                     | -0.12384 | -0.15328 | 2.08679  | H                     | -0.34953 | -0.16519 | 1.878106 |
| O                     | 1.211748 | -0.97534 | 0.873588 | O                     | 1.185847 | -0.92832 | 0.881454 |
| C                     | 1.725327 | -1.15709 | -0.44783 | C                     | 1.885235 | -1.10681 | -0.3509  |
| H                     | 2.348477 | -2.05303 | -0.38603 | H                     | 2.545718 | -1.9617  | -0.18185 |
| C                     | 2.536411 | 0.0308   | -0.88638 | C                     | 2.671352 | 0.120616 | -0.71968 |
| H                     | 3.299343 | 0.357925 | -0.18193 | H                     | 3.294598 | 0.529516 | 0.073423 |
| H                     | 2.845768 | 0.031993 | -1.92947 | H                     | 3.128417 | 0.111339 | -1.70674 |
| H                     | 1.644305 | 1.017177 | -0.81196 | H                     | 1.692031 | 1.034769 | -0.82442 |
| H                     | 0.905454 | -1.35377 | -1.14203 | H                     | 1.181419 | -1.365   | -1.14855 |
| O                     | 0.464948 | 1.241433 | 0.826087 | O                     | 0.273816 | 1.205649 | 0.602997 |
| O                     | 0.618915 | 1.528305 | -0.52342 | O                     | 0.592955 | 1.424878 | -0.72995 |
| $E_{0K}=-496.6196443$ |          |          |          | $E_{0K}=-496.6183148$ |          |          |          |

| Structure 5           |          |          |          | Structure 6           |          |          |          |
|-----------------------|----------|----------|----------|-----------------------|----------|----------|----------|
| C                     | -2.1333  | -1.91118 | 1.675617 | C                     | -0.62202 | -3.0985  | 0.004212 |
| H                     | -1.3839  | -1.88701 | 2.468893 | H                     | -0.49286 | -3.08836 | -1.07986 |
| H                     | -2.8627  | -1.11798 | 1.850939 | H                     | 0.358105 | -3.13671 | 0.480627 |
| H                     | -2.64719 | -2.87222 | 1.738148 | H                     | -1.17243 | -4.00299 | 0.272918 |
| C                     | -1.50658 | -1.76174 | 0.298429 | C                     | -1.40443 | -1.87357 | 0.448563 |
| H                     | -0.7059  | -2.49614 | 0.16175  | H                     | -2.40196 | -1.88066 | 0.007853 |
| H                     | -2.25215 | -1.91879 | -0.4805  | H                     | -1.51768 | -1.85938 | 1.539126 |
| O                     | -1.00721 | -0.45082 | 0.04217  | O                     | -0.81457 | -0.64929 | 0.014688 |
| C                     | -0.01542 | -0.02397 | 0.898112 | C                     | 0.084952 | -0.09612 | 0.896824 |
| H                     | -0.34003 | 0.050201 | 1.938754 | H                     | -0.29365 | -0.0709  | 1.923074 |
| O                     | 1.087047 | -0.87659 | 0.922006 | O                     | 1.288182 | -0.79637 | 0.973886 |
| C                     | 1.739011 | -1.14093 | -0.32152 | C                     | 2.023241 | -0.97477 | -0.23797 |
| H                     | 2.342306 | -2.03502 | -0.14123 | H                     | 2.728512 | -1.78378 | -0.02667 |
| C                     | 2.597428 | 0.01639  | -0.75006 | C                     | 2.743528 | 0.282752 | -0.63719 |
| H                     | 3.261582 | 0.412955 | 0.01556  | H                     | 3.313469 | 0.766529 | 0.153817 |
| H                     | 3.033027 | -0.06108 | -1.74381 | H                     | 3.231412 | 0.258819 | -1.60915 |
| H                     | 1.675695 | 0.987214 | -0.87513 | H                     | 1.709162 | 1.122809 | -0.81313 |
| H                     | 0.999105 | -1.37182 | -1.09445 | H                     | 1.352682 | -1.3028  | -1.03779 |
| O                     | 0.312648 | 1.305507 | 0.576922 | O                     | 0.260593 | 1.264338 | 0.582516 |
| O                     | 0.604618 | 1.444884 | -0.77264 | O                     | 0.582281 | 1.432163 | -0.75696 |
| $E_{0K}=-496.6158752$ |          |          |          | $E_{0K}=-496.6158873$ |          |          |          |

---

Structure 7

---

|                    |          |          |          |
|--------------------|----------|----------|----------|
| C                  | -2.31855 | -0.79613 | -2.00603 |
| H                  | -2.92364 | -1.49803 | -1.43063 |
| H                  | -2.78508 | 0.188247 | -1.95452 |
| H                  | -2.29819 | -1.12127 | -3.0479  |
| C                  | -0.91172 | -0.73771 | -1.45061 |
| H                  | -0.44213 | -1.72573 | -1.48787 |
| H                  | -0.30294 | -0.02295 | -2.01088 |
| O                  | -1.02368 | -0.32263 | -0.09115 |
| C                  | 0.09637  | -0.19563 | 0.697361 |
| H                  | -0.22107 | -0.35019 | 1.728617 |
| O                  | 1.096646 | -1.13744 | 0.465294 |
| C                  | 2.096259 | -1.00477 | -0.54656 |
| H                  | 2.70715  | -1.90383 | -0.42226 |
| C                  | 2.949425 | 0.224647 | -0.42085 |
| H                  | 3.305347 | 0.457335 | 0.581199 |
| H                  | 3.682178 | 0.35284  | -1.2145  |
| H                  | 2.042122 | 1.19263  | -0.60469 |
| H                  | 1.652757 | -1.0452  | -1.54518 |
| O                  | 0.573486 | 1.139442 | 0.735941 |
| O                  | 0.933469 | 1.566499 | -0.53452 |
| <hr/>              |          |          |          |
| E <sub>0K</sub> =- |          |          |          |
| 496.6096632        |          |          |          |
| <hr/>              |          |          |          |

**(10) T1 diagnostic values for reactants, products and transition states**

**Table S55.** T1 diagnostic values for the lowest energy structures of reactants, products and transition states.

| Species | Reactant 1 | Product 1  | Product 2  | Transition state 1 | Transition state 2 |
|---------|------------|------------|------------|--------------------|--------------------|
| T1      | 0.01490897 | 0.01122069 | 0.01066586 | 0.0171889          | 0.01572767         |
| Species | Reactant 2 | Product 3  | Product 4  | Transition state 3 | Transition state 4 |
| T1      | 0.01447493 | 0.01073409 | 0.00837410 | 0.01806940         | 0.01557074         |
